# Supplementary material for: Electrochemical oxidative cross-coupling of tetrahydroquinolines and azoles
Source: Royal Society of Chemistry journal article supplement (doi:10.1039/d3gc04453j), 2024-01-01

## Supporting Information

### Electrochemical oxidative cross-coupling of tetrahydroquinolines and azoles

Dan Yang<sup>a‡</sup>, Yu-Fang Tan<sup>a‡</sup>, Ya-Nan Zhao<sup>b</sup>, Jin-Feng Lv<sup>a</sup>, Zhi Guan<sup>a\*</sup> and Yan-Hong He<sup>a\*</sup>

<sup>a</sup> Key Laboratory of Applied Chemistry of Chongqing Municipality, School of Chemistry and Chemical Engineering, Southwest University, Chongqing 400715, China

<sup>b</sup> Analytical and Testing Center, Southwest University, Chongqing, 400715, China

<sup>‡</sup> These authors contributed equally to this work

### Contents

|                                                                                                               |     |
|---------------------------------------------------------------------------------------------------------------|-----|
| 1. General methods .....                                                                                      | S1  |
| 2. Experimental procedures.....                                                                               | S1  |
| 2.1. General procedure for the preparation of tetrahydroquinolines <b>1</b> .....                             | S1  |
| 2.2. General procedure for the preparation of benzotriazoles <b>2</b> .....                                   | S2  |
| 2.3. General procedure for the electrochemical synthesis of dihydroquinoline-azole derivatives <b>3</b> ..... | S3  |
| 2.4. By-products .....                                                                                        | S4  |
| 3. Optimization of reaction conditions .....                                                                  | S7  |
| 3.1. Reaction condition optimization for synthesizing dihydroquinoline-azole derivatives.....                 | S7  |
| 3.2. Reaction condition optimization for synthesizing of quinoline-azole derivatives.....                     | S12 |
| 4. Mechanistic investigation.....                                                                             | S13 |
| 4.1. Cyclic voltammetry experiments.....                                                                      | S13 |
| 4.2. Radical trapping experiments .....                                                                       | S14 |
| 5. Characterization data of the products.....                                                                 | S15 |
| 6. References.....                                                                                            | S27 |
| 7. NMR Spectra of Products .....                                                                              | S28 |

## 1. General methods

Unless otherwise noted, all reagents were purchased from commercial suppliers and used without further purification. Reactions were monitored by thin-layer chromatography (TLC) with Haiyang GF 254 silica gel plates (Qingdao Haiyang chemical industry Co Ltd, Qingdao, China) using UV light and vanillic aldehyde or phosphomolybdic acid as visualizing agents. Flash column chromatography was performed using 200-300 mesh silica gel at increased pressure.  $^1\text{H}$  NMR spectra,  $^{19}\text{F}$  NMR spectra and  $^{13}\text{C}$  NMR spectra were respectively recorded on 600 MHz, 565 MHz, 400 MHz, 151 MHz and 101 MHz NMR spectrometers. Chemical shifts ( $\delta$ ) were expressed in ppm with TMS as the internal standard, and coupling constants (J) were reported in Hz. High-resolution mass spectra were obtained by using ESI ionization sources (quadrupole time-of-flight mass spectrometer, Bruker Impact II, Bremen, Germany). Cyclic voltammograms were obtained on a CHI 700E potentiostat (CH Instruments, Inc.).

**Abbreviations:** THF = tetrahydrofuran, HFIP = 1,1,1,3,3,3-hexafluoropropan-2-ol, MeOH = methanol, DMA = *N,N*-dimethylaniline, DMF = *N,N*-dimethylformamide, CYH = cyclohexane, DMSO = dimethyl sulfoxide, EA = ethyl acetate, DCE = dichloroethane, DCM = dichloromethane, MeCN = acetonitrile, TEMPO = 2,2,6,6-tetramethylpiperidinoxy, ACT = 4-ACETAMIDO-TEMPO, FC = ferrocene, TAPA = triphenylamine, ABN = 9-azabicyclo[3.3.1]nonane N-oxy, DABCO = triethylenediamine

## 2. Experimental procedures

### 2.1. General procedure for the preparation of tetrahydroquinolines 1<sup>1</sup>

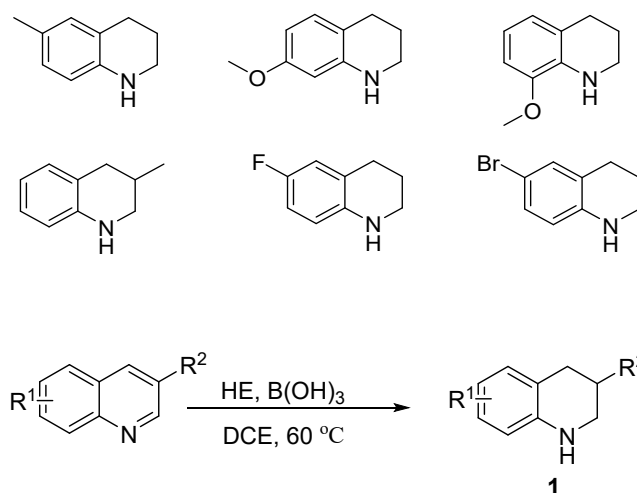

In a 50 mL round-bottomed flask, quinoline (5 mmol), Hantzsch ester (2.5 equiv),  $B(OH)_3$  (15 mol%) and dichloroethane (20 mL) were charged. The reaction mixture was stirred at 60 °C (in a preheated oil bath). After completion of the reaction (detected by TLC), the reaction mixture was cooled to RT, extracted with EtOAc and washed with  $H_2O$ . The combined organic layers were dried over anhydrous  $Na_2SO_4$  and evaporated in vacuo. The residue was purified by flash chromatography on silica gel using petroleum ether/ethyl acetate as the eluent to give desired product **1**.

## 2.2. General procedure for the preparation of benzotriazoles **2**<sup>2</sup>

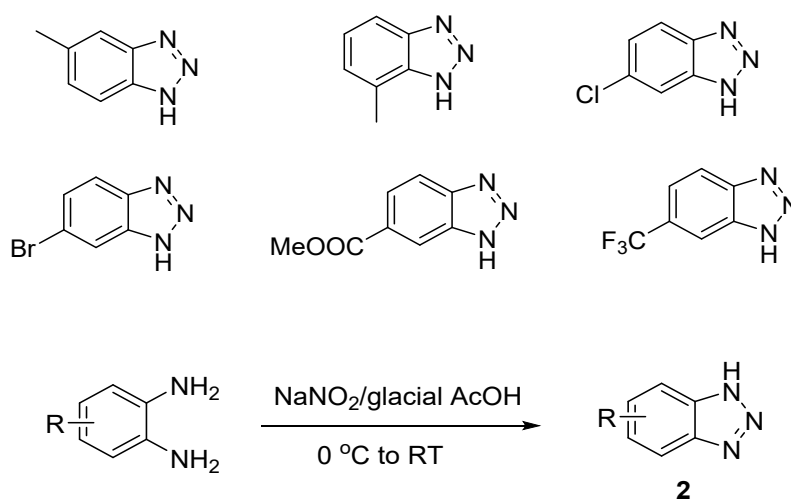

1,2-Phenylenediamine derivative (3.26 mmol) was dissolved in a mixture of 0.45 mL of glacial acetic acid and 1.2 mL of water and cooled to 4 °C. A solution of sodium nitrite (0.26 g, 3.76 mmol) in 1 mL of water was added. The reaction temperature rose to 50 °C for 30 min, and

then was allowed to reach RT. and stirred at this temperature for 12 h. The mixture was cooled to 0 °C for 1 h. Produced precipitate was collected by suction filtration, and washed with water, and dried to provide substituted benzotriazoles **2**.

### 2.3. General procedure for the electrochemical synthesis of dihydroquinoline-azole derivatives **3**

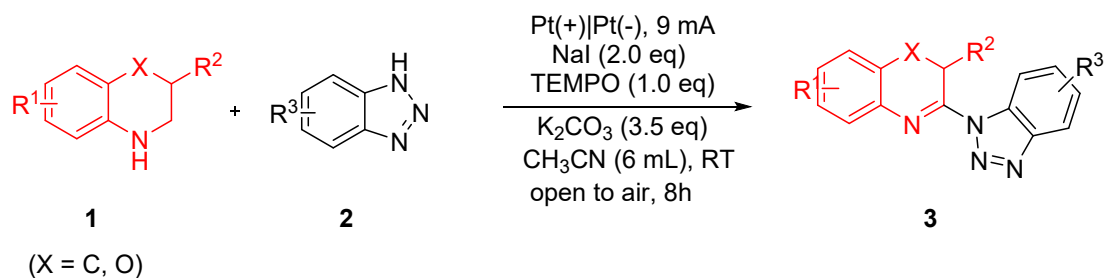

Substrate **1** (0.3 mmol, 1 equiv.), substrate **2** (0.6 mmol, 2 equiv.), NaI (0.6 mmol, 2 equiv.), TEMPO (0.3 mmol, 1 equiv.), K<sub>2</sub>CO<sub>3</sub> (1.05 mmol, 3.5 equiv.) and CH<sub>3</sub>CN (6 mL) were added to a three-necked flask (10 mL) equipped with a magnetic stirring bar. Two platinum plates (1 cm x 1 cm x 0.2 mm each) were used as anode and cathode respectively (the electrodes were immersed 1 cm in the reaction solution). The reaction mixture was stirred and electrolyzed at a constant current of 9 mA at RT. After reaction completion (monitored by TLC), solvent (CH<sub>3</sub>CN) was removed, the crude reaction mixture was purified by flash column chromatography on silica gel with petroleum ether/ethyl acetate as the eluent to obtain the target product **3**. (**Note:** Some products **3** may undergo decomposition in deuterated chloroform).

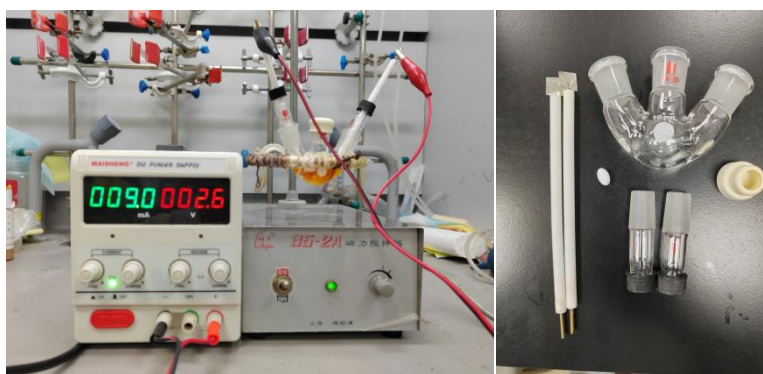

**Figure S1** Electrochemical setup used.

The experimental setup consisted of two platinum sheet electrodes (1 cm x 1 cm x 0.2 mm each), a three-necked flask (10 mL), an adjustable DC regulated power supply (MS-150V 100 mA), a magnetic stirrer, The reaction system is not sealed.

## 2.4. By-products

In some cases (but not all) depicted in Figure 1, both products **3** and **4** were obtained, with **3** being the major product and **4** the minor product. Taking the model reaction as an example: under the standard conditions depicted in Scheme 1, the reaction was conducted for 8 h, and after silica gel column chromatography separation, dihydroquinazoline-imidazole derivative **3a** (90% yield) and further oxidized product quinazoline-imidazole derivative **4a** (4% yield) were obtained.

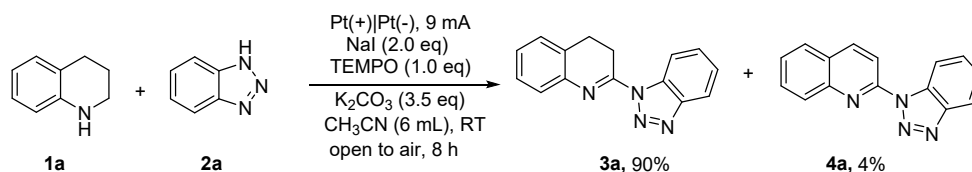

Under the standard reaction conditions depicted in Scheme 2, after 32 h of reaction, no dihydroquinazoline-imidazole derivative **3a** was observed, and the reaction generated quinazoline derivative **4a** (60% yield), with the main by-products being quinazoline **7** (5% yield) and dihydroquinazolin-4-one **8** (21% yield).

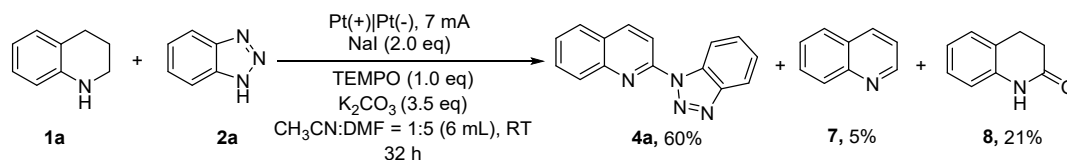

Some products **3** may undergo decomposition in deuterated chloroform. Taking product **3a** as an example, possible path way is shown as following:

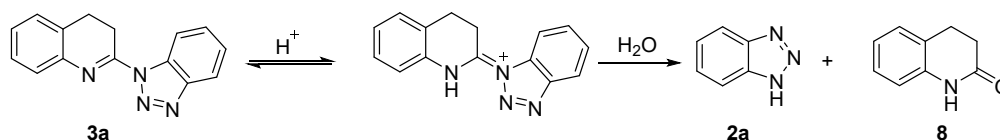

We conducted <sup>1</sup>H-NMR analysis of product **3a** at different time intervals in deuterated chloroform and observed that the extent of decomposition increased with prolonged exposure.

# <sup>1</sup>H-NMR Spectrum (600 MHz, CDCl<sub>3</sub>) of 3a:

YD-1H\_93\_F1d  
YD-2024-39-1

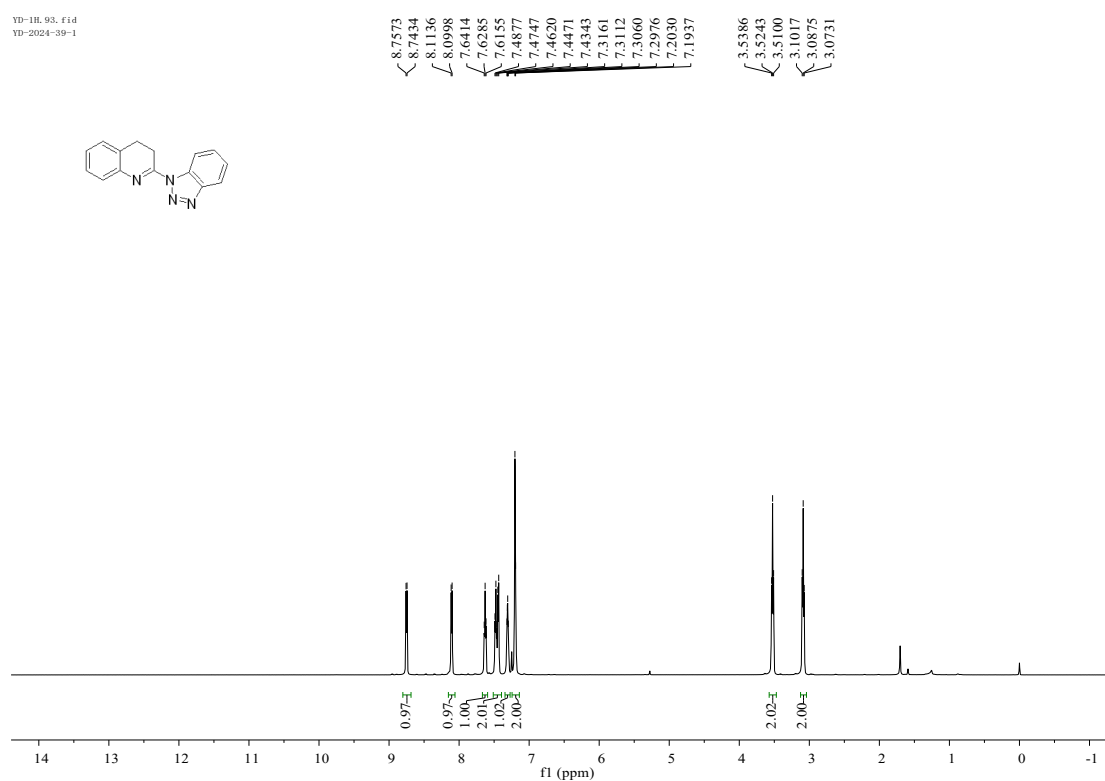

After one day:

# <sup>1</sup>H-NMR Spectrum (600 MHz, CDCl<sub>3</sub>) of 3a:

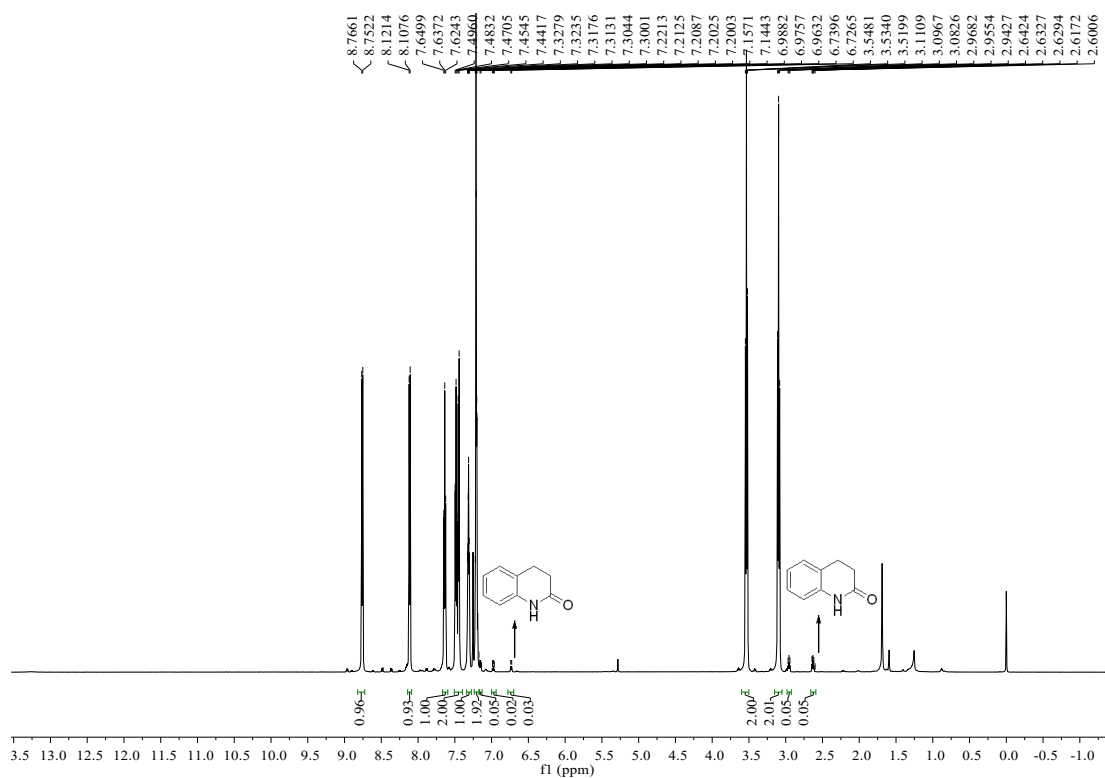

After five days:

**<sup>1</sup>H-NMR Spectrum (600 MHz, CDCl<sub>3</sub>) of 3a**

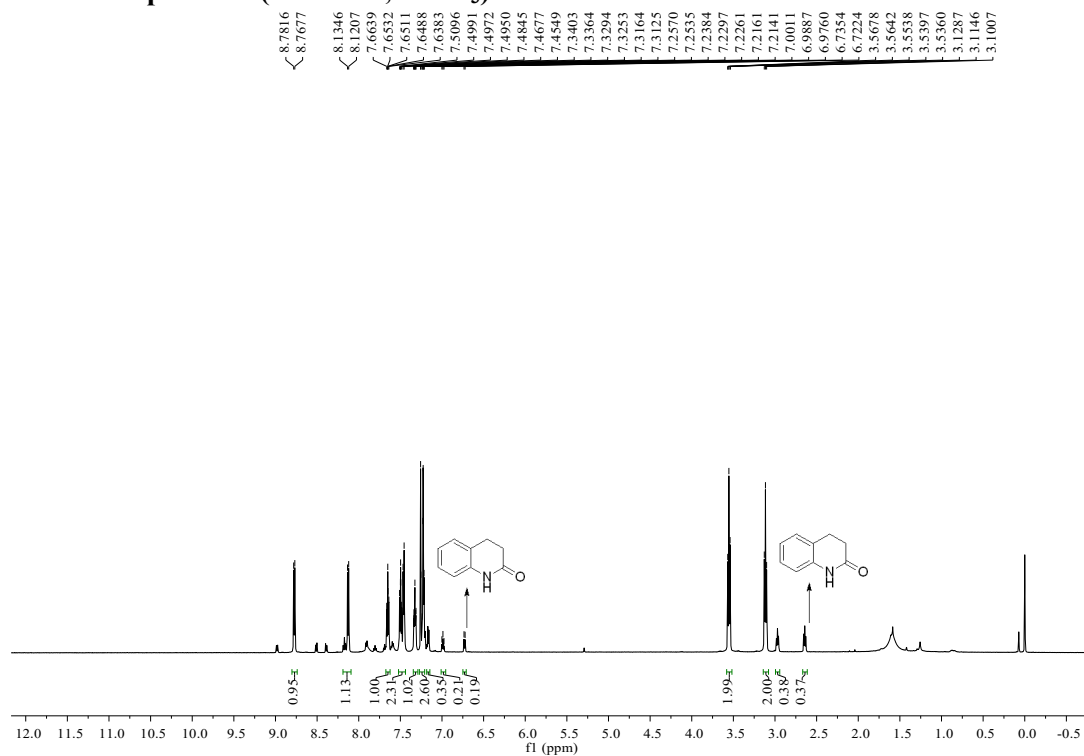

**<sup>13</sup>C-NMR Spectrum (151 MHz, CDCl<sub>3</sub>) of 3a**

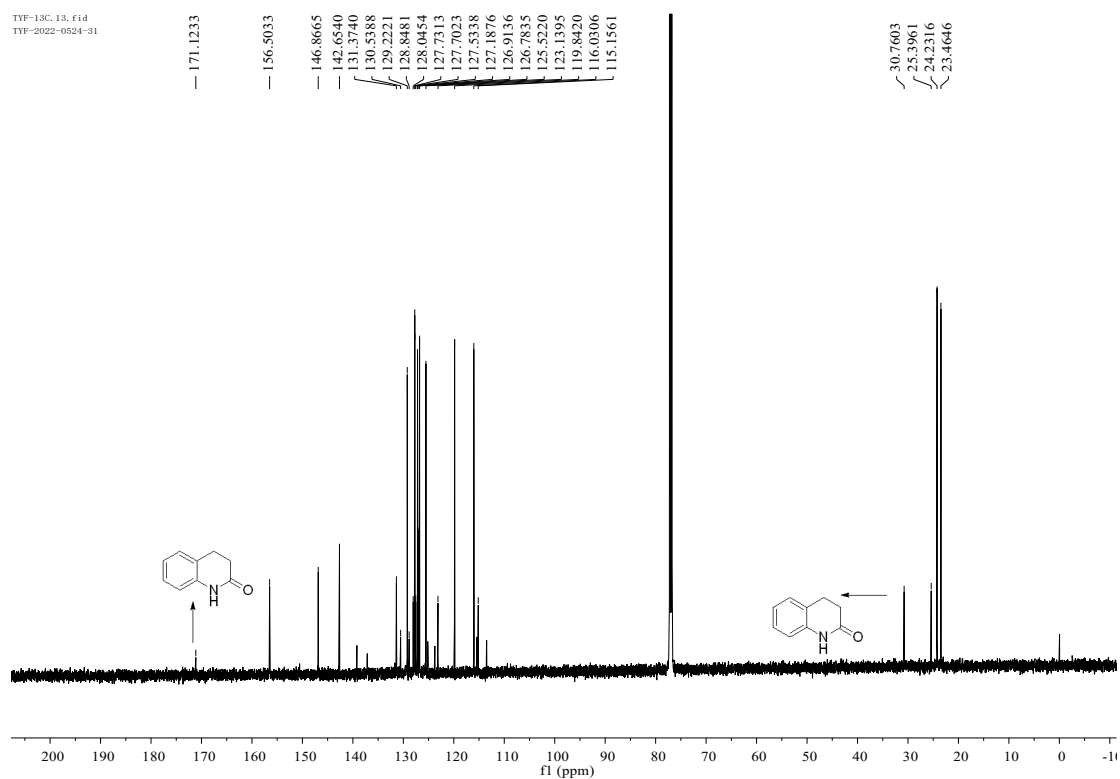

**quinoline (8)<sup>3</sup>**:  $R_f = 0.25$  (Petroleum ether/EtOAc, 5:1). Colorless liquid. <sup>1</sup>H NMR (600 MHz,

Chloroform-d)  $\delta$  8.88 (dd,  $J = 4.3, 1.7$  Hz, 1H), 8.13 – 8.09 (m, 1H), 8.05 (dd,  $J = 8.3, 1.8$  Hz, 1H), 7.73 (dd,  $J = 8.2, 1.5$  Hz, 1H), 7.65 – 7.67 (m, 1H), 7.46 – 7.49 (m, 1H), 7.30 (dd,  $J = 8.3, 4.2$  Hz, 1H).  $^{13}\text{C}$  NMR (151 MHz, Chloroform-d)  $\delta$  150.3, 148.2, 135.9, 129.4, 129.3, 128.2, 127.7, 126.4, 121.0.

**3,4-dihydroquinolin-2(1H)-one (9)**<sup>3</sup> :  $R_f = 0.25$  (Petroleum ether/EtOAc, 5:1). White solid.  $^1\text{H}$  NMR (600 MHz, Chloroform-d)  $\delta$  9.60 (s, 1H), 7.19 – 7.11 (m, 2H), 7.01 – 6.95 (m, 1H), 6.87 (d,  $J = 7.8$  Hz, 1H), 2.96 (t,  $J = 7.6$  Hz, 2H), 2.64 (dd,  $J = 8.6, 6.7$  Hz, 2H).  $^{13}\text{C}$  NMR (151 MHz, Chloroform-d)  $\delta$  137.4, 127.8, 127.5, 123.6, 123.0, 115.7, 30.7, 25.3.

### 3. Optimization of reaction conditions

#### 3.1. Reaction condition optimization for synthesizing dihydroquinoline-azole derivatives

**Table S1.** Solvent screening<sup>a</sup>

| Entry     | Solvent                 | <b>3a</b> Yield (%) <sup>b</sup> | <b>4a</b> Yield (%) <sup>b</sup> |
|-----------|-------------------------|----------------------------------|----------------------------------|
| 1         | THF                     | N.D.                             | Trace                            |
| 2         | Acetone                 | N.D.                             | N.D.                             |
| 3         | MeOH                    | N.D.                             | Trace                            |
| 4         | DMSO                    | N.D.                             | 26                               |
| 5         | DMA                     | Trace                            | 17                               |
| 6         | EA                      | N.D.                             | 13                               |
| 7         | DCE                     | N.D.                             | N.D.                             |
| 8         | CYH                     | N.D.                             | N.D.                             |
| 9         | DMF                     | 18                               | 25                               |
| <b>10</b> | <b>CH<sub>3</sub>CN</b> | <b>60</b>                        | <b>Trace</b>                     |

<sup>a</sup> Reaction conditions: A mixture of **1a** (0.3 mmol, 1 equiv), **2a** (0.6 mmol, 2.0 equiv), NaI (0.6 mmol, 2.0 equiv), TEMPO (0.3 mmol, 1.0 equiv) and  $\text{K}_2\text{CO}_3$  (0.6 mmol, 2.0 equiv) in a solvent (6 mL) under a constant current of 9 mA (Pt anode: 1 cm x 1 cm x 0.2 mm; Pt cathode: 1 cm x 1 cm x 0.2 mm) in an undivided cell at RT for 8 h. <sup>b</sup> Isolated yield.

**Table S2.** Screening of mixed solvents<sup>a</sup>



| Entry    | Solvent                       | Yield (%) <sup>b</sup> |
|----------|-------------------------------|------------------------|
| <b>1</b> | <b>CH<sub>3</sub>CN</b>       | <b>60</b>              |
| 2        | CH <sub>3</sub> CN:DMF = 5:1  | 7                      |
| 3        | CH <sub>3</sub> CN:DMF = 1:1  | 36                     |
| 4        | CH <sub>3</sub> CN:DMF = 1:5  | 14                     |
| 5        | CH <sub>3</sub> CN:HFIP = 5:1 | N.D.                   |
| 6        | CH <sub>3</sub> CN:HFIP = 2:1 | N.D.                   |
| 7        | CH <sub>3</sub> CN:HFIP = 1:1 | N.D.                   |
| 8        | CH <sub>3</sub> CN:HFIP = 1:5 | N.D.                   |

<sup>a</sup> Reaction conditions: A mixture of **1a** (0.3 mmol, 1 equiv), **2a** (0.6 mmol, 2.0 equiv), NaI (0.6 mmol, 2.0 equiv), TEMPO (0.3 mmol, 1.0 equiv) and K<sub>2</sub>CO<sub>3</sub> (0.6 mmol, 2.0 equiv) in a solvent (6 mL) under a constant current of 9 mA (Pt anode: 1 cm x 1 cm x 0.2 mm; Pt cathode: 1 cm x 1 cm x 0.2 mm) in an undivided cell at RT for 8 h. <sup>b</sup> Isolated yield.

**Table S3.** Electrolyte screening

| Entry    | Electrolyte                                                   | Yield (%) <sup>b</sup> |
|----------|---------------------------------------------------------------|------------------------|
| 1        | --                                                            | Overload               |
| <b>2</b> | <b>NaI</b>                                                    | <b>60</b>              |
| 3        | KI                                                            | 7                      |
| 4        | NH <sub>4</sub> I                                             | Trace                  |
| 5        | <sup>n</sup> Bu <sub>4</sub> NI                               | 9                      |
| 6        | <sup>n</sup> Bu <sub>4</sub> NBr                              | 17                     |
| 7        | <sup>n</sup> Bu <sub>4</sub> NOAc                             | 10                     |
| 8        | <sup>n</sup> Bu <sub>4</sub> NPF <sub>6</sub>                 | Trace                  |
| 9        | <sup>n</sup> Bu <sub>4</sub> NClO <sub>4</sub>                | 9                      |
| 10       | <sup>n</sup> Bu <sub>4</sub> NBF <sub>4</sub>                 | Trace                  |
| 11       | NaBF <sub>4</sub>                                             | Trace                  |
| 12       | <sup>n</sup> Bu <sub>4</sub> NCF <sub>3</sub> SO <sub>3</sub> | Trace                  |
| 13       | LiClO <sub>4</sub>                                            | 12                     |
| 14       | LiOAc                                                         | N.D.                   |

<sup>a</sup> Reaction conditions: A mixture of **1a** (0.3 mmol, 1 equiv), **2a** (0.6 mmol, 2.0 equiv), electrolyte (0.6 mmol, 2.0 equiv), TEMPO (0.3 mmol, 1.0 equiv) and K<sub>2</sub>CO<sub>3</sub> (0.6 mmol, 2.0 equiv) in CH<sub>3</sub>CN (6 mL) under a constant current of 9 mA (Pt anode: 1 cm x 1 cm x 0.2 mm; Pt cathode: 1 cm x 1 cm x 0.2 mm) in an undivided cell at RT for 8 h. <sup>b</sup> Isolated yield.

**Table S4.** Mediator screening <sup>a</sup>

| Entry | Mediator                         | Yield (%) <sup>b</sup> |
|-------|----------------------------------|------------------------|
| 1     | --                               | Trace                  |
| 2     | <b>TEMPO</b>                     | <b>60</b>              |
| 3     | ACT                              | 27                     |
| 4     | FC                               | 8                      |
| 5     | TAPA                             | 15                     |
| 6     | NaBr                             | Trace                  |
| 7     | <sup>n</sup> Bu <sub>4</sub> NBr | 26                     |
| 8     | ABN                              | 15                     |
| 9     | DABCO                            | Trace                  |

<sup>a</sup> Reaction conditions: A mixture of **1a** (0.3 mmol, 1 equiv), **2a** (0.6 mmol, 2.0 equiv), NaI (0.6 mmol, 2.0 equiv), mediator (0.3 mmol, 1.0 equiv) and K<sub>2</sub>CO<sub>3</sub> (0.6 mmol, 2.0 equiv) in CH<sub>3</sub>CN (6 mL) under a constant current of 9 mA (Pt anode: 1 cm x 1 cm x 0.2 mm; Pt cathode: 1 cm x 1 cm x 0.2 mm) in an undivided cell at RT for 8 h. <sup>b</sup> Isolated yield.

**Table S5.** Additive screening <sup>a</sup>

| Entry | Additive                           | Yield (%) <sup>b</sup> |
|-------|------------------------------------|------------------------|
| 1     | --                                 | 23                     |
| 2     | <b>K<sub>2</sub>CO<sub>3</sub></b> | <b>60</b>              |
| 3     | Na <sub>2</sub> CO <sub>3</sub>    | 9                      |
| 4     | Cs <sub>2</sub> CO <sub>3</sub>    | 22                     |
| 5     | KHCO <sub>3</sub>                  | 17                     |
| 6     | K <sub>3</sub> PO <sub>4</sub>     | 8                      |
| 7     | KOH                                | 44                     |
| 8     | NaOH                               | 26                     |
| 9     | <sup>t</sup> BuOK                  | 24                     |
| 10    | KF                                 | 40                     |
| 11    | CsF                                | 47                     |
| 12    | DBU                                | 19                     |
| 13    | DABCO                              | Trace                  |
| 14    | 2,6-Dimethylpyridine               | 10                     |

<sup>a</sup> Reaction conditions: A mixture of **1a** (0.3 mmol, 1 equiv), **2a** (0.6 mmol, 2.0 equiv), NaI (0.6 mmol, 2.0 equiv), TEMPO (0.3 mmol, 1.0 equiv) and additive (0.6 mmol, 2.0 equiv) in CH<sub>3</sub>CN (6 mL) under a constant current of 9 mA (Pt anode: 1 cm x 1 cm x 0.2 mm; Pt cathode: 1 cm x 1 cm x 0.2 mm) in an undivided cell at RT for 8 h. <sup>b</sup> Isolated yield.

**Table S6.** Screening of the amount of NaI<sup>a</sup>

| Entry    | Amount of NaI (equiv) | Yield (%) <sup>b</sup> |
|----------|-----------------------|------------------------|
| 1        | 1.0                   | 22                     |
| 2        | 1.5                   | 24                     |
| <b>3</b> | <b>2.0</b>            | <b>60</b>              |
| 4        | 2.5                   | 55                     |

<sup>a</sup> Reaction conditions: A mixture of **1a** (0.3 mmol, 1 equiv), **2a** (0.6 mmol, 2.0 equiv), NaI (x mmol), TEMPO (0.3 mmol, 1.0 equiv) and K<sub>2</sub>CO<sub>3</sub> (0.6 mmol, 2.0 equiv) in CH<sub>3</sub>CN (6 mL) under a constant current of 9 mA (Pt anode: 1 cm x 1 cm x 0.2 mm; Pt cathode: 1 cm x 1 cm x 0.2 mm) in an undivided cell at RT for 8 h. <sup>b</sup> Isolated yield.

**Table S7.** Screening of the amount of K<sub>2</sub>CO<sub>3</sub><sup>a</sup>

| Entry    | Amount of K <sub>2</sub> CO <sub>3</sub> (equiv) | Yield (%) <sup>b</sup> |
|----------|--------------------------------------------------|------------------------|
| 1        | 0                                                | 23                     |
| 2        | 1                                                | 25                     |
| 3        | 2                                                | 60                     |
| 4        | 3                                                | 63                     |
| <b>5</b> | <b>3.5</b>                                       | <b>90</b>              |
| 6        | 4.0                                              | 75                     |

<sup>a</sup> Reaction conditions: A mixture of **1a** (0.3 mmol, 1 equiv), **2a** (0.6 mmol, 2.0 equiv), NaI (0.6 mmol, 2.0 equiv), TEMPO (0.3 mmol, 1.0 equiv) and K<sub>2</sub>CO<sub>3</sub> (x mmol) in CH<sub>3</sub>CN (6 mL) under a constant current of 9 mA (Pt anode: 1 cm x 1 cm x 0.2 mm; Pt cathode: 1 cm x 1 cm x 0.2 mm) in an undivided cell at RT for 8 h. <sup>b</sup> Isolated yield.

**Table S8.** Screening of the amount of TEMPO<sup>a</sup>

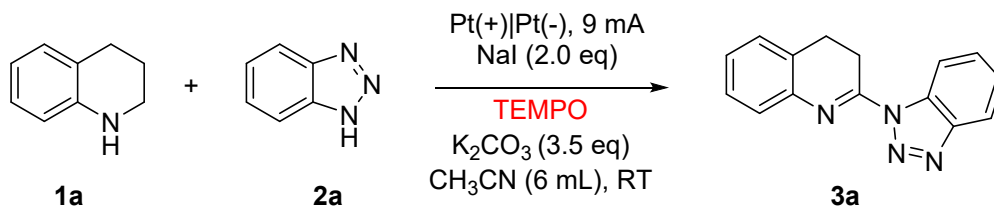

| Entry    | Amount of TEMPO ( <i>equiv</i> ) | Yield (%) <sup>b</sup> |
|----------|----------------------------------|------------------------|
| 1        | 0                                | Trace                  |
| 2        | 0.25                             | 28                     |
| 3        | 0.5                              | 65                     |
| 4        | 0.75                             | 71                     |
| <b>5</b> | <b>1.0</b>                       | <b>90</b>              |
| 6        | 1.5                              | 78                     |

<sup>a</sup> Reaction conditions: A mixture of **1a** (0.3 mmol, 1 *equiv*), **2a** (0.6 mmol, 2.0 *equiv*), NaI (0.6 mmol, 2.0 *equiv*), TEMPO (x mmol) and K<sub>2</sub>CO<sub>3</sub> (1.05 mmol, 3.5 *equiv*) in CH<sub>3</sub>CN (6 mL) under a constant current of 9 mA (Pt anode: 1 cm x 1 cm x 0.2 mm; Pt cathode: 1 cm x 1 cm x 0.2 mm) in an undivided cell at RT for 8 h. <sup>b</sup> Isolated yield.

**Table S9.** Current screening<sup>a</sup>

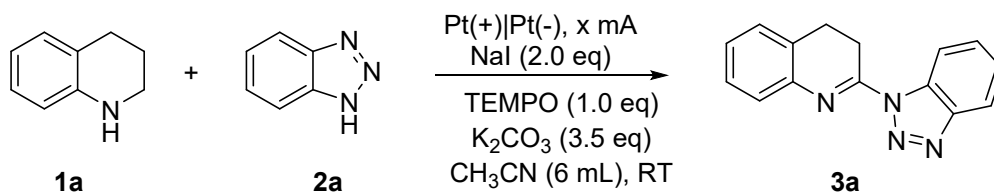

| Entry    | Current (mA) | Time (h) | Yield (%) <sup>b</sup> |
|----------|--------------|----------|------------------------|
| 1        | 3            | 13       | 29                     |
| 2        | 6            | 9.5      | 57                     |
| <b>3</b> | <b>9</b>     | <b>8</b> | <b>90</b>              |
| 4        | 12           | 6        | 85                     |
| 5        | 14           | 5.5      | 85                     |

<sup>a</sup> Reaction conditions: A mixture of **1a** (0.3 mmol, 1 *equiv*), **2a** (0.6 mmol, 2.0 *equiv*), NaI (0.6 mmol, 2.0 *equiv*), TEMPO (0.3 mmol, 1.0 *equiv*) and K<sub>2</sub>CO<sub>3</sub> (1.05 mmol, 3.5 *equiv*) in CH<sub>3</sub>CN (6 mL) under a constant current (Pt anode: 1 cm x 1 cm x 0.2 mm; Pt cathode: 1 cm x 1 cm x 0.2 mm) in an undivided cell at RT. <sup>b</sup> Isolated yield.

**Table S10.** Electrode material screening<sup>a</sup>

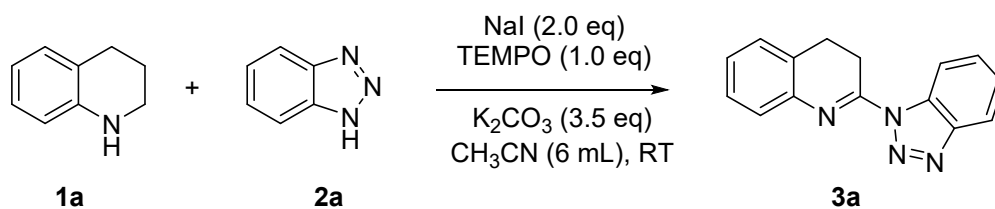

| Entry | Electrode material | Yield (%) <sup>b</sup> |
|-------|--------------------|------------------------|
| 1     | C(+)    Pt(-)      | 70                     |

|   |                |                            |
|---|----------------|----------------------------|
| 2 | C(+)    C(-)   | Carbon electrode corrosion |
| 3 | Pt(+)    Pt(-) | 90                         |
| 4 | Pt(+)    C(-)  | Carbon electrode corrosion |

<sup>a</sup> Reaction conditions: A mixture of **1a** (0.3 mmol, 1 equiv), **2a** (0.6 mmol, 2.0 equiv), NaI (0.6 mmol, 2.0 equiv), TEMPO (0.3 mmol, 1.0 equiv) and K<sub>2</sub>CO<sub>3</sub> (1.05 mmol, 3.5 equiv) in CH<sub>3</sub>CN (6 mL) under a constant current of 9 mA (x anode, x cathode) in an undivided cell at RT for 8 h. <sup>b</sup> Isolated yield.

### 3.2. Reaction condition optimization for synthesizing of quinoline-azole derivatives

**Table S11.** Solvent screening <sup>a</sup>

| Entry    | Solvent                           | Yield (%) <sup>b</sup> |
|----------|-----------------------------------|------------------------|
| 1        | DMF                               | 28                     |
| 2        | CH <sub>3</sub> CN                | 51                     |
| 3        | CH <sub>3</sub> CN:DMF = 5:1      | Trace                  |
| 4        | CH <sub>3</sub> CN:DMF = 1:1      | 42                     |
| <b>5</b> | <b>CH<sub>3</sub>CN:DMF = 1:5</b> | <b>60</b>              |
| 6        | CH <sub>3</sub> CN:DMF = 1:2      | 55                     |

<sup>a</sup> Reaction conditions: A mixture of **1a** (0.3 mmol, 1 equiv), **2a** (0.6 mmol, 2 equiv), NaI (0.6 mmol, 2 equiv), TEMPO (0.3 mmol, 1 equiv) and K<sub>2</sub>CO<sub>3</sub> (1.05 mmol, 3.5 equiv) in solvent (6 mL) under a constant current of 7 mA (Pt anode: 1 cm x 1 cm x 0.2 mm; Pt cathode: 1 cm x 1 cm x 0.2 mm) in an undivided cell at RT for 32 h. <sup>b</sup> Isolated yield.

**Table S12.** Current screening <sup>a</sup>

| Entry    | Current (mA) | Time (h)  | Yield (%) <sup>b</sup> |
|----------|--------------|-----------|------------------------|
| <b>1</b> | <b>7</b>     | <b>32</b> | <b>60</b>              |
| 2        | 9            | 28        | 53                     |
| 3        | 11           | 22        | 48                     |
| 4        | 13           | 18        | 45                     |

<sup>a</sup> Reaction conditions: A mixture of **1a** (0.3 mmol, 1 equiv), **2a** (0.6 mmol, 2 equiv), NaI (0.6 mmol, 2 equiv), TEMPO (0.3 mmol, 1 equiv) and K<sub>2</sub>CO<sub>3</sub> (1.05 mmol, 3.5 equiv) in CH<sub>3</sub>CN:DMF = 1:5 (6 mL) under a constant current of x mA (Pt anode: 1 cm x 1 cm x 0.2 mm; Pt cathode: 1 cm x 1 cm x 0.2 mm) in an undivided cell at RT. <sup>b</sup> Isolated yield.

## 4. Mechanistic investigation

### 4.1. Cyclic voltammetry experiments

The electrochemical measurement was performed by a computer-controlled electrochemical analyzer. Cyclic voltammetry performed in a three-electrode cell was carried out in a three-electrode battery (volume 15 mL; CH<sub>3</sub>CN as solvent, <sup>n</sup>Bu<sub>4</sub>NClO<sub>4</sub> 0.05 M as supporting electrolyte, 2 mM concentration of test compound), and glassy carbon (diameter 3 mm) as working electrode, platinum wire as auxiliary electrode, Ag/AgCl (3 M KCl) as reference electrode. The scanning speed was 100 mV·s<sup>-1</sup>. For tetrahydroquinoline (**1a**), benzotriazole (**2a**), NaI, and TEMPO, the oxidation potential range studied was 0.0 V to +3.0 V, relative to Ag/AgCl (3 M KCl). The oxidation potential of 1,2,3,4-tetrahydroquinoline (**1a**), 1*H*-benzo[*d*][1,2,3] triazole (**2a**), NaI and TEMPO was determined as: 1,2,3,4-tetrahydroquinoline (**1a**) (E<sub>ox</sub> = + 0.58 V vs. Ag/AgCl in CH<sub>3</sub>CN); NaI (E<sub>ox</sub> = + 0.23 V vs Ag/AgCl in CH<sub>3</sub>CN); TEMPO (E<sub>ox</sub> = + 0.53 V vs Ag/AgCl in CH<sub>3</sub>CN). Benzotriazole (**2a**) had no oxidation potential peak in the tested range.

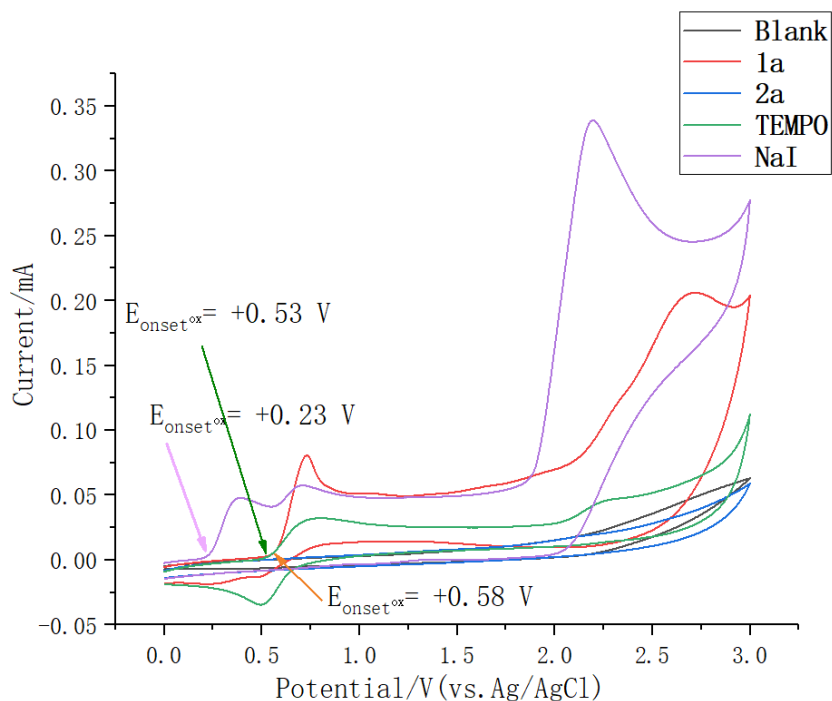

**Figure S2.** Cyclic voltammetry of NaI, TEMPO, **1a** and **2a** in CH<sub>3</sub>CN and blank.

## 4.2. Radical trapping experiments

Under standard conditions, BHT (4.0 equiv to **1a**) was added to the model reaction system at the beginning of the reaction. After 4 h, a small amount of reaction mixture was taken out for high-resolution mass spectrometry (HRMS) measurement. From TLC, only trace amount of product **3a** was observed.

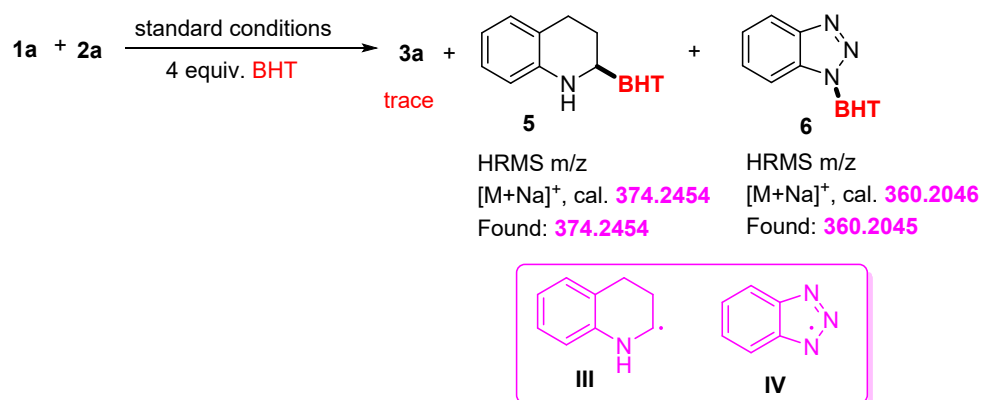

**Scheme S1.** Radical trapping experiments.

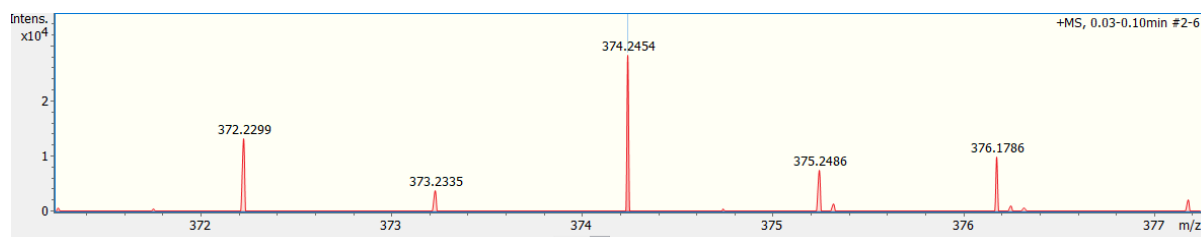

**Figure S3.** Mass spectrometry (HRMS) data of the radical trapping experiments (with BHT).

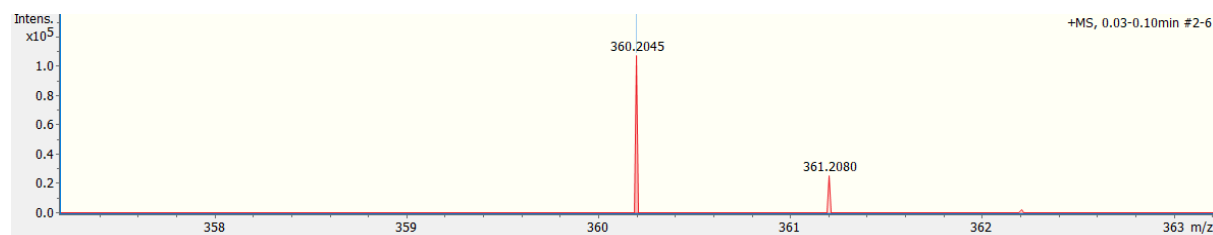

**Figure S4.** Mass spectrometry (HRMS) data of the radical trapping experiments (with BHT).

## 5. Characterization data of the products

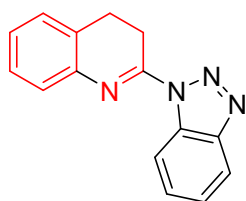

**2-(1*H*-benzo[*d*][1,2,3]triazol-1-yl)-3,4-dihydroquinoline (3a):**  $R_f = 0.25$  (Petroleum ether/EtOAc, 5:1). 63.9 mg, 90% yield. White solid.  $^1\text{H}$  NMR (600 MHz, Chloroform-*d*)  $\delta$  8.73 (d,  $J = 8.3$  Hz, 1H), 8.09 (d,  $J = 8.3$  Hz, 1H), 7.61 (t,  $J = 7.7$  Hz, 1H), 7.46 (t,  $J = 7.6$  Hz, 1H), 7.42 (d,  $J = 7.7$  Hz, 1H), 7.29 (dt,  $J = 8.0, 4.3$  Hz, 1H), 7.18 (d,  $J = 4.6$  Hz, 2H), 3.50 (t,  $J = 8.5$  Hz, 2H), 3.07 (t,  $J = 8.5$  Hz, 2H).  $^{13}\text{C}$  NMR (151 MHz, Chloroform-*d*)  $\delta$  156.4, 146.8, 142.6, 131.3, 129.2, 127.7, 127.2, 127.1, 126.9, 126.7, 125.5, 119.8, 116.0, 24.1, 23.4. HRMS (ESI):  $m/z$ : calcd for  $\text{C}_{15}\text{H}_{12}\text{N}_4\text{Na}$  ( $\text{M}+\text{Na}$ ) $^+$  271.0954; found 271.0956

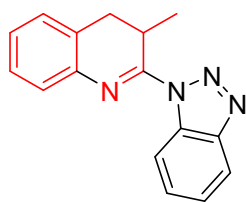



**2-(1*H*-benzo[*d*][1,2,3]triazol-1-yl)-3-methyl-3,4-dihydroquinoline (3b):**  $R_f = 0.25$  (Petroleum ether/EtOAc, 5:1). 24.1 mg, 32% yield. White solid.  $^1\text{H}$  NMR (400 MHz, Chloroform-*d*)  $\delta$  8.78 (d,  $J = 8.3$  Hz, 1H), 8.13 (d,  $J = 8.2$  Hz, 1H), 7.65 (t,  $J = 7.6$  Hz, 1H), 7.48 (dd,  $J = 17.0, 7.7$  Hz, 2H), 7.37 – 7.29 (m, 1H), 7.22 (d,  $J = 11.4$  Hz, 2H), 4.21 (p,  $J = 7.0$  Hz, 1H), 3.37 (dd,  $J = 16.1, 7.0$  Hz, 1H), 2.82 (d,  $J = 16.2$  Hz, 1H), 1.27 (d,  $J = 7.2$  Hz, 3H).  $^{13}\text{C}$  NMR (101 MHz, Chloroform-*d*)  $\delta$  160.5, 146.8, 141.8, 131.5, 129.3, 128.7, 127.7, 127.4, 126.5, 125.6, 125.5, 119.9, 116.2, 32.0, 28.3, 16.3. HRMS (ESI):  $m/z$ : calcd for  $\text{C}_{16}\text{H}_{14}\text{N}_4\text{Na}$  ( $\text{M}+\text{Na}$ ) $^+$  285.1111; found 285.1111

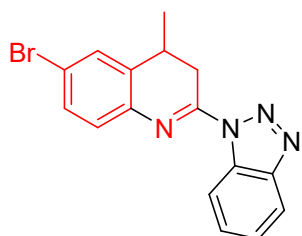

**2-(1*H*-benzo[*d*][1,2,3]triazol-1-yl)-6-bromo-4-methyl-3,4-dihydroquinoline (3c):**  $R_f = 0.25$  (Petroleum ether/EtOAc, 5:1). 67.0 mg, 70% yield. White solid.  $^1\text{H}$  NMR (600 MHz, Chloroform-*d*)  $\delta$  8.72 (d,  $J = 8.3$  Hz, 1H), 8.12 (d,  $J = 8.3$  Hz, 1H), 7.65 (t,  $J = 7.7$  Hz, 1H), 7.50 (t,  $J = 7.7$  Hz, 1H), 7.46 – 7.39 (m, 2H), 7.33 (d,  $J = 8.2$  Hz, 1H), 3.53 (dd,  $J = 17.2, 7.1$  Hz, 1H), 3.39 (dd,  $J = 17.2, 7.7$  Hz, 1H), 3.24 (q,  $J = 7.2$  Hz, 1H), 1.37 (d,  $J = 7.0$  Hz, 3H).  $^{13}\text{C}$  NMR (151 MHz, Chloroform-*d*)  $\delta$  156.2, 146.9, 141.0, 134.4, 131.2, 130.7, 129.3, 129.2, 128.4, 125.7, 120.6, 119.9, 115.9, 30.7, 29.4, 19.8. HRMS (ESI):  $m/z$ : calcd for  $\text{C}_{16}\text{H}_{13}\text{BrN}_4\text{Na}$  ( $\text{M}+\text{Na}$ ) $^+$  363.0216; found 363.0216

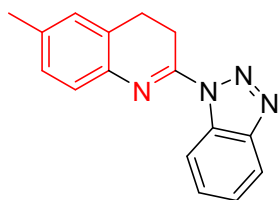

**2-(1*H*-benzo[*d*][1,2,3]triazol-1-yl)-6-methyl-3,4-dihydroquinoline (3d):**  $R_f = 0.25$  (Petroleum ether/EtOAc, 5:1). 66.0 mg, 89% yield. White solid.  $^1\text{H}$  NMR (400 MHz, Chloroform-*d*)  $\delta$  8.76 (d,  $J = 8.3$  Hz, 1H), 8.11 (d,  $J = 8.3$  Hz, 1H), 7.63 (dd,  $J = 8.3, 7.0, 1.1$  Hz, 1H), 7.48 (dd,  $J = 8.2, 7.0, 1.1$  Hz, 1H), 7.34 (d,  $J = 7.9$  Hz, 1H), 7.12 (dd,  $J = 7.9, 2.0$  Hz,

1H), 7.03 (d,  $J = 2.0$  Hz, 1H), 3.52 (t,  $J = 8.5$  Hz, 2H), 3.06 (t,  $J = 8.5$  Hz, 2H), 2.37 (s, 3H).  $^{13}\text{C}$  NMR (151 MHz, Chloroform- $d$ )  $\delta$  155.7, 146.8, 140.2, 137.1, 131.4, 129.1, 128.4, 128.2, 126.7, 126.6, 125.4, 119.7, 116.0, 24.2, 23.5, 21.2. HRMS (ESI):  $m/z$ : calcd for  $\text{C}_{16}\text{H}_{14}\text{N}_4\text{Na}$  ( $\text{M}+\text{Na}$ ) $^+$  285.1111; found 285.1111

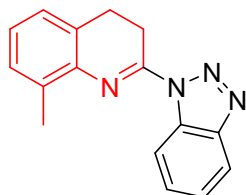

**2-(1H-benzo[ $d$ ][1,2,3]triazol-1-yl)-8-methyl-3,4-dihydroquinoline (3e):**  $R_f = 0.25$  (Petroleum ether/EtOAc, 5:1). 70.0 mg, 93% yield. White solid.  $^1\text{H}$  NMR (600 MHz, Chloroform- $d$ )  $\delta$  8.70 (d,  $J = 8.3$  Hz, 1H), 8.11 (d,  $J = 8.3$  Hz, 1H), 7.64 (t,  $J = 7.6$  Hz, 1H), 7.47 (t,  $J = 7.6$  Hz, 1H), 7.17 (d,  $J = 7.4$  Hz, 1H), 7.09 (t,  $J = 7.4$  Hz, 1H), 7.04 (d,  $J = 7.2$  Hz, 1H), 3.49 (t,  $J = 8.4$  Hz, 2H), 3.05 (t,  $J = 8.4$  Hz, 2H), 2.56 (s, 3H).  $^{13}\text{C}$  NMR (151 MHz, Chloroform- $d$ )  $\delta$  155.2, 146.8, 140.9, 134.7, 131.2, 129.3, 126.8, 126.7, 125.9, 125.5, 125.3, 119.9, 115.7, 24.6, 23.2, 18.3. HRMS (ESI):  $m/z$ : calcd for  $\text{C}_{16}\text{H}_{14}\text{N}_4\text{Na}$  ( $\text{M}+\text{Na}$ ) $^+$  285.1111; found 285.1110

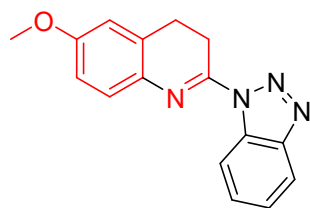

**2-(1H-benzo[ $d$ ][1,2,3]triazol-1-yl)-6-methoxy-3,4-dihydroquinoline (3f):**  $R_f = 0.25$  (Petroleum ether/EtOAc, 5:1). 44.8 mg, 56% yield. White solid.  $^1\text{H}$  NMR (600 MHz, Chloroform- $d$ )  $\delta$  8.79 – 8.69 (m, 1H), 8.16 – 8.05 (m, 1H), 7.62 (dd,  $J = 8.2, 7.0, 1.1$  Hz, 1H), 7.47 (dd,  $J = 8.2, 7.0, 1.1$  Hz, 1H), 7.38 (d,  $J = 8.5$  Hz, 1H), 6.84 (dd,  $J = 8.5, 2.8$  Hz, 1H), 6.80 – 6.72 (m, 1H), 3.84 (s, 3H), 3.51 (t,  $J = 8.6$  Hz, 2H), 3.08 (t,  $J = 8.4$  Hz, 2H).  $^{13}\text{C}$  NMR (151 MHz, Chloroform- $d$ )  $\delta$  158.6, 154.4, 146.7, 136.1, 131.2, 129.0, 128.3, 127.8, 125.4, 119.7, 115.9, 113.5, 112.3, 55.5, 24.7, 23.2. HRMS (ESI):  $m/z$ : calcd for  $\text{C}_{16}\text{H}_{14}\text{N}_4\text{ONa}$  ( $\text{M}+\text{Na}$ ) $^+$  301.1060; found 301.1059

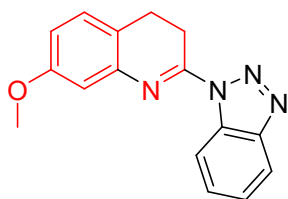

**2-(1H-benzo[d][1,2,3]triazol-1-yl)-7-methoxy-3,4-dihydroquinoline (3g):**  $R_f = 0.25$  (Petroleum ether/EtOAc, 5:1). 73.6 mg, 92% yield. White solid.  $^1\text{H}$  NMR (600 MHz, Chloroform-*d*)  $\delta$  8.76 (d,  $J = 8.3$  Hz, 1H), 8.12 (d,  $J = 8.3$  Hz, 1H), 7.69 – 7.63 (m, 1H), 7.54 – 7.44 (m, 1H), 7.12 (d,  $J = 8.2$  Hz, 1H), 7.03 (d,  $J = 2.7$  Hz, 1H), 6.78 (dd,  $J = 8.1, 2.6$  Hz, 1H), 3.87 (s, 3H), 3.53 (t,  $J = 8.4$  Hz, 2H), 3.04 (t,  $J = 8.5$  Hz, 2H).  $^{13}\text{C}$  NMR (151 MHz, Chloroform-*d*)  $\delta$  159.3, 157.0, 146.8, 143.5, 131.3, 129.2, 128.1, 125.5, 119.8, 118.9, 116.0, 113.0, 112.0, 55.5, 23.8, 23.4. HRMS (ESI):  $m/z$ : calcd for  $\text{C}_{16}\text{H}_{14}\text{N}_4\text{ONa}$  ( $\text{M}+\text{Na}$ ) $^+$  301.1060; found 301.1059

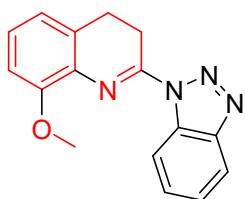

**2-(1H-benzo[d][1,2,3]triazol-1-yl)-8-methoxy-3,4-dihydroquinoline (3h):**  $R_f = 0.25$  (Petroleum ether/EtOAc, 5:1). 73.6 mg, 92% yield. White solid.  $^1\text{H}$  NMR (600 MHz, DMSO-*d*<sub>6</sub>)  $\delta$  8.93 – 8.86 (m, 1H), 8.42 – 8.34 (m, 1H), 7.92 (dd,  $J = 8.3, 7.0, 1.1$  Hz, 1H), 7.75 (dd,  $J = 8.2, 7.0, 1.1$  Hz, 1H), 7.57 – 7.52 (m, 1H), 7.05 (d,  $J = 7.3$  Hz, 2H), 3.96 (s, 3H), 3.62 (t,  $J = 8.5$  Hz, 2H), 3.24 (t,  $J = 8.5$  Hz, 2H).  $^{13}\text{C}$  NMR (151 MHz, DMSO-*d*<sub>6</sub>)  $\delta$  158.7, 155.2, 146.5, 136.0, 131.1, 129.9, 129.2, 128.0, 126.2, 120.0, 116.1, 113.9, 112.8, 55.8, 24.2, 23.2. HRMS (ESI):  $m/z$ : calcd for  $\text{C}_{16}\text{H}_{14}\text{N}_4\text{ONa}$  ( $\text{M}+\text{Na}$ ) $^+$  301.1060; found 301.1059

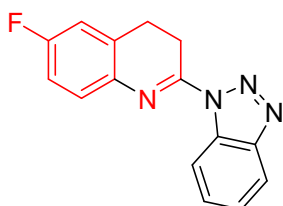

**2-(1*H*-benzo[*d*][1,2,3]triazol-1-yl)-6-fluoro-3,4-dihydroquinoline (3i):**  $R_f = 0.25$  (Petroleum ether/EtOAc, 5:1). 68.0 mg, 92% yield. White solid.  $^1\text{H}$  NMR (600 MHz, Chloroform-*d*)  $\delta$  8.72 (dd,  $J = 8.3, 1.2$  Hz, 1H), 8.12 (dd,  $J = 8.4, 1.2$  Hz, 1H), 7.64 (dd,  $J = 8.3, 7.0, 1.1$  Hz, 1H), 7.49 (dd,  $J = 8.3, 7.0, 1.2$  Hz, 1H), 7.41 (dd,  $J = 8.6, 5.4$  Hz, 1H), 7.00 (dt,  $J = 8.8, 4.4$  Hz, 1H), 6.94 (dd,  $J = 8.6, 2.8$  Hz, 1H), 3.53 (t,  $J = 8.5$  Hz, 2H), 3.09 (t,  $J = 8.5$  Hz, 2H).  $^{13}\text{C}$  NMR (151 MHz, Chloroform-*d*)  $\delta$  161.4 (d,  $J = 247.2$  Hz), 155.8, 146.8, 138.8, 131.2, 129.2, 128.1 (d,  $J = 8.6$  Hz), 125.59, 119.9, 115.8, 114.7 (d,  $J = 23.1$  Hz), 114.3, 114.2 (d,  $J = 22.2$  Hz), 24.4, 22.9.  $^{19}\text{F}$  NMR (565 MHz, Chloroform-*d*)  $\delta$  -114.85. HRMS (ESI):  $m/z$ : calcd for  $\text{C}_{15}\text{H}_{11}\text{FN}_4\text{Na}$  ( $\text{M}+\text{Na}$ ) $^+$  289.0860; found 289.0859

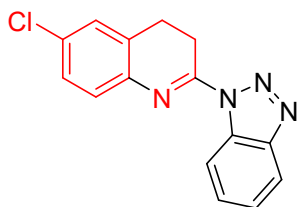

**2-(1*H*-benzo[*d*][1,2,3]triazol-1-yl)-6-chloro-3,4-dihydroquinoline (3j):**  $R_f = 0.25$  (Petroleum ether/EtOAc, 5:1). 76.0 mg, 94% yield. White solid.  $^1\text{H}$  NMR (600 MHz, Chloroform-*d*)  $\delta$  8.69 (d,  $J = 8.3$  Hz, 1H), 8.10 (d,  $J = 8.3$  Hz, 1H), 7.62 (t,  $J = 7.7$  Hz, 1H), 7.48 (t,  $J = 7.7$  Hz, 1H), 7.35 (d,  $J = 8.3$  Hz, 1H), 7.29 – 7.23 (m, 1H), 7.18 (s, 1H), 3.55 – 3.46 (m, 2H), 3.06 (t,  $J = 8.5$  Hz, 2H).  $^{13}\text{C}$  NMR (151 MHz, Chloroform-*d*)  $\delta$  156.6, 146.8, 141.1, 132.2, 131.2, 129.3, 128.5, 127.8, 127.7, 125.6, 119.9, 115.9, 24.1, 23.0. HRMS (ESI):  $m/z$ : calcd for  $\text{C}_{15}\text{H}_{11}\text{ClN}_4\text{Na}$  ( $\text{M}+\text{Na}$ ) $^+$  305.0564; found 305.0563

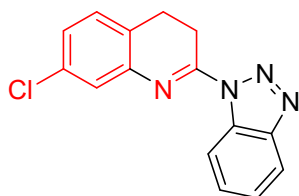

**2-(1*H*-benzo[*d*][1,2,3]triazol-1-yl)-7-chloro-3,4-dihydroquinoline (3k):**  $R_f = 0.25$  (Petroleum ether/EtOAc, 5:1). 62.3 mg, 77% yield. White solid.  $^1\text{H}$  NMR (400 MHz, Chloroform-*d*)  $\delta$  8.73 (d,  $J = 8.3$  Hz, 1H), 8.13 (d,  $J = 8.3$  Hz, 1H), 7.66 (t,  $J = 7.7$  Hz, 1H), 7.59 – 7.43 (m, 2H), 7.21 – 7.14 (m, 2H), 3.56 (t,  $J = 8.4$  Hz, 2H), 3.08 (t,  $J = 8.4$  Hz, 2H).  $^{13}\text{C}$

NMR (151 MHz, Chloroform-*d*)  $\delta$  157.5, 146.8, 143.8, 133.0, 131.2, 129.5, 128.6, 126.9, 126.6, 125.7, 125.2, 119.9, 115.9, 23.6, 23.3. HRMS (ESI): *m/z*: calcd for C<sub>15</sub>H<sub>11</sub>ClN<sub>4</sub>Na (M+Na)<sup>+</sup> 305.0564; found 305.0564

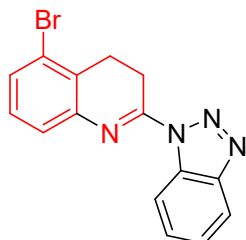

**2-(1*H*-benzo[*d*][1,2,3]triazol-1-yl)-5-bromo-3,4-dihydroquinoline (3l):**  $R_f = 0.25$  (Petroleum ether/EtOAc, 5:1). 50.0 mg, 54% yield. White solid. <sup>1</sup>H NMR (600 MHz, Chloroform-*d*)  $\delta$  8.72 (d, *J* = 8.3 Hz, 0.80H), 8.13 (d, *J* = 8.3 Hz, 0.80H), 7.65 (t, *J* = 7.7 Hz, H), 7.50 (t, *J* = 7.6 Hz, 1H), 7.45 (d, *J* = 8.0 Hz, 1H), 7.41 (d, *J* = 7.7 Hz, 1H), 7.19 (t, *J* = 7.9 Hz, 1H), 3.57 (t, *J* = 8.6 Hz, 2H), 3.19 (t, *J* = 8.6 Hz, 2H). <sup>13</sup>C NMR (151 MHz, Chloroform-*d*)  $\delta$  156.9, 146.8, 144.0, 131.2, 131.0, 129.4, 128.5, 126.9, 126.1, 125.7, 123.7, 119.9, 115.9, 24.2, 23.2. HRMS (ESI): *m/z*: calcd for C<sub>15</sub>H<sub>11</sub>BrN<sub>4</sub>Na (M+Na)<sup>+</sup> 349.0059; found 349.0055

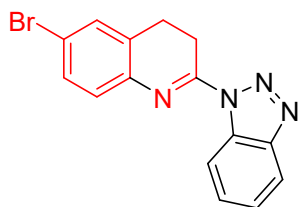

**2-(1*H*-benzo[*d*][1,2,3]triazol-1-yl)-6-bromo-3,4-dihydroquinoline (3m):**  $R_f = 0.25$  (Petroleum ether/EtOAc, 5:1). 87.1 mg, 91% yield. White solid. <sup>1</sup>H NMR (600 MHz, Chloroform-*d*)  $\delta$  8.68 (d, *J* = 8.3 Hz, 1H), 8.10 (d, *J* = 8.3 Hz, 1H), 7.63 (q, *J* = 8.5, 7.7 Hz, 1H), 7.47 (t, *J* = 7.7 Hz, 1H), 7.41 (dd, *J* = 8.3, 2.3 Hz, 1H), 7.33 (d, *J* = 2.5 Hz, 1H), 7.28 (d, *J* = 8.2 Hz, 1H), 3.50 (t, *J* = 8.5 Hz, 2H), 3.06 (t, *J* = 8.5 Hz, 2H). <sup>13</sup>C NMR (151 MHz, Chloroform-*d*)  $\delta$  156.6, 146.8, 141.6, 131.2, 130.7, 130.6, 129.3, 128.9, 128.1, 125.6, 120.2, 119.9, 115.9, 23.9, 23.0. HRMS (ESI): *m/z*: calcd for C<sub>15</sub>H<sub>11</sub>BrN<sub>4</sub>Na (M+Na)<sup>+</sup> 349.0059; found 349.0053

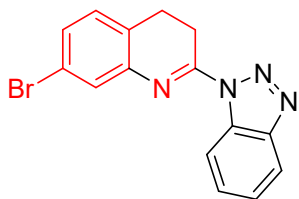

**2-(1H-benzo[d][1,2,3]triazol-1-yl)-7-bromo-3,4-dihydroquinoline (3n):**  $R_f = 0.25$  (Petroleum ether/EtOAc, 5:1). 80.0 mg, 86% yield. White solid.  $^1\text{H}$  NMR (600 MHz, Chloroform- $d$ )  $\delta$  8.66 (d,  $J = 8.3$  Hz, 1H), 8.08 (d,  $J = 8.5$  Hz, 1H), 7.62 (t,  $J = 7.6$  Hz, 1H), 7.57 (d,  $J = 2.2$  Hz, 1H), 7.47 (t,  $J = 7.7$  Hz, 1H), 7.29 (dd,  $J = 8.0, 2.1$  Hz, 1H), 7.05 (d,  $J = 7.9$  Hz, 1H), 3.50 (t,  $J = 8.5$  Hz, 2H), 3.01 (t,  $J = 8.5$  Hz, 2H).  $^{13}\text{C}$  NMR (151 MHz, Chloroform- $d$ )  $\delta$  157.4, 146.8, 143.9, 131.1, 129.7, 129.5, 129.4, 128.9, 125.7, 125.7, 120.6, 119.9, 115.9, 23.6, 23.2. HRMS (ESI):  $m/z$ : calcd for  $\text{C}_{15}\text{H}_{11}\text{BrN}_4\text{Na}$  ( $\text{M}+\text{Na}$ ) $^+$  349.0059; found 349.0046

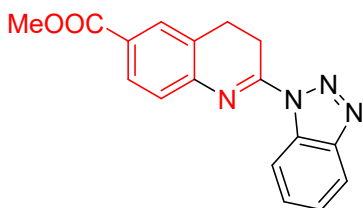

**Methyl-2-(1H-benzo[d][1,2,3]triazol-1-yl)-3,4-dihydroquinoline-6-carboxylate (3o):**  $R_f = 0.25$  (Petroleum ether/EtOAc, 5:1). 40.0 mg, 46% yield. White solid.  $^1\text{H}$  NMR (600 MHz, Chloroform- $d$ )  $\delta$  8.75 (d,  $J = 8.3$  Hz, 1H), 8.13 (d,  $J = 8.3$  Hz, 1H), 8.00 (dd,  $J = 8.1, 1.9$  Hz, 1H), 7.92 (d,  $J = 2.1$  Hz, 1H), 7.71 – 7.64 (m, 1H), 7.53 – 7.46 (m, 2H), 3.94 (s, 3H), 3.59 (t,  $J = 8.4$  Hz, 2H), 3.15 (t,  $J = 8.5$  Hz, 2H).  $^{13}\text{C}$  NMR (151 MHz, DMSO- $d_6$ )  $\delta$  166.7, 166.3, 159.7, 146.7, 146.6, 131.1, 130.4, 129.2, 128.3, 128.1, 126.8, 126.5, 120.2, 116.3, 52.5, 23.4, 23.2. HRMS (ESI):  $m/z$ : calcd for  $\text{C}_{17}\text{H}_{14}\text{N}_4\text{O}_2\text{Na}$  ( $\text{M}+\text{Na}$ ) $^+$  329.1009; found 329.1008

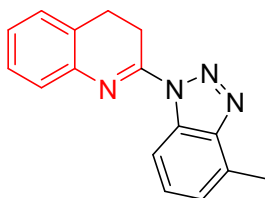

**2-(4-methyl-1H-benzo[d][1,2,3]triazol-1-yl)-3,4-dihydroquinoline (3p):**  $R_f = 0.25$  (Petroleum ether/EtOAc, 5:1). 60.0 mg, 85% yield. White solid.  $^1\text{H}$  NMR (600 MHz, Chloroform- $d$ )  $\delta$  8.55 (d,  $J = 8.3$  Hz, 1H), 7.51 (t,  $J = 7.7$  Hz, 1H), 7.44 (d,  $J = 7.7$  Hz, 1H),

7.30 (td,  $J = 7.7, 7.1, 2.4$  Hz, 1H), 7.26 – 7.22 (m, 1H), 7.22 – 7.15 (m, 2H), 3.52 (t,  $J = 8.4$  Hz, 2H), 3.08 (t,  $J = 8.5$  Hz, 2H), 2.84 (s, 3H).  $^{13}\text{C}$  NMR (151 MHz, Chloroform- $d$ )  $\delta$  156.5, 146.6, 142.7, 131.2, 130.7, 129.2, 127.7, 127.6, 127.0, 126.9, 126.7, 125.6, 113.2, 24.2, 23.4, 16.6. HRMS (ESI):  $m/z$ : calcd for  $\text{C}_{16}\text{H}_{14}\text{N}_4\text{Na}$  ( $\text{M}+\text{Na}$ ) $^+$  285.1111; found 285.1110

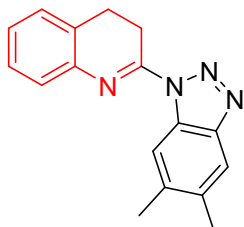

**2-(5,6-dimethyl-1H-benzo[d][1,2,3]triazol-1-yl)-3,4-dihydroquinoline (3q):**  $R_f = 0.25$  (Petroleum ether/EtOAc, 5:1). 60.0 mg, 75% yield. White solid.  $^1\text{H}$  NMR (600 MHz, Chloroform- $d$ )  $\delta$  8.48 (s, 1H), 7.83 (s, 1H), 7.46 (d,  $J = 7.7$  Hz, 1H), 7.34 – 7.27 (m, 1H), 7.23 – 7.16 (m, 2H), 3.50 (t,  $J = 8.4$  Hz, 2H), 3.07 (t,  $J = 8.5$  Hz, 2H), 2.49 (s, 3H), 2.43 (s, 3H).  $^{13}\text{C}$  NMR (151 MHz, DMSO- $d_6$ )  $\delta$  157.3, 145.7, 142.7, 140.2, 135.8, 130.0, 128.2, 127.9, 127.7, 127.4, 126.8, 119.1, 115.5, 23.7, 23.3, 21.1, 20.3. HRMS (ESI):  $m/z$ : calcd for  $\text{C}_{17}\text{H}_{16}\text{N}_4\text{Na}$  ( $\text{M}+\text{Na}$ ) $^+$  299.1267; found 299.1269

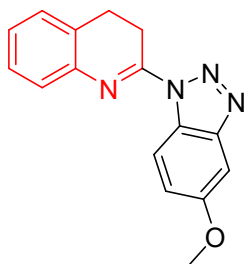

**2-(5-methoxy-1H-benzo[d][1,2,3]triazol-1-yl)-3,4-dihydroquinoline (3r):**  $R_f = 0.25$  (Petroleum ether/EtOAc, 5:1). 35.0 mg, 44% yield. White solid.  $^1\text{H}$  NMR (600 MHz, Chloroform- $d$ )  $\delta$  8.20 (d,  $J = 2.4$  Hz, 1H), 7.96 (d,  $J = 9.0$  Hz, 1H), 7.42 (d,  $J = 7.7$  Hz, 1H), 7.32 (dd,  $J = 7.2, 2.1$  Hz, 1H), 7.25 – 7.19 (m, 2H), 7.11 (dd,  $J = 9.0, 2.4, 0.9$  Hz, 1H), 3.98 (d,  $J = 0.9$  Hz, 3H), 3.56 – 3.50 (m, 2H), 3.10 (t,  $J = 8.4$  Hz, 2H).  $^{13}\text{C}$  NMR (151 MHz, Chloroform- $d$ )  $\delta$  161.2, 156.8, 142.6, 142.0, 132.7, 127.7, 127.6, 127.1, 126.9, 126.6, 120.4, 117.2, 96.8, 55.8, 24.2, 23.4. HRMS (ESI):  $m/z$ : calcd for  $\text{C}_{16}\text{H}_{14}\text{N}_4\text{ONa}$  ( $\text{M}+\text{Na}$ ) $^+$  3301.1060; found 301.1060

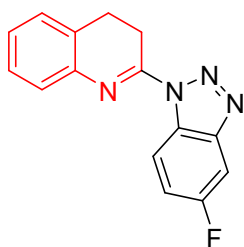

**2-(5-fluoro-1H-benzo[d][1,2,3]triazol-1-yl)-3,4-dihydroquinoline (3s):**  $R_f = 0.25$  (Petroleum ether/EtOAc, 5:1). 39.0 mg, 53% yield. White solid.  $^1\text{H NMR}$  (600 MHz, Chloroform-*d*)  $\delta$  8.45 (dd,  $J = 8.6, 2.4$  Hz, 1H), 8.07 (dd,  $J = 9.0, 4.7$  Hz, 1H), 7.45 (d,  $J = 7.7$  Hz, 1H), 7.33 (td,  $J = 8.0, 6.6, 3.6$  Hz, 1H), 7.28 – 7.25 (m, 1H), 7.24 – 7.20 (m, 2H), 3.52 (t,  $J = 8.5$  Hz, 2H), 3.11 (t,  $J = 8.5$  Hz, 2H).  $^{13}\text{C NMR}$  (151 MHz, Chloroform-*d*)  $\delta$  163.2 (d,  $J = 249.3$  Hz), 156.3, 143.5, 139.4, 142.3, 127.8, 127.7, 127.3, 126.8 (d,  $J = 2.3$  Hz), 121.2, 121.1, 115.2 (d,  $J = 26.8$  Hz), 102.2 (d,  $J = 29.3$  Hz), 24.1, 23.3.  $^{19}\text{F NMR}$  (565 MHz, Chloroform-*d*)  $\delta$  -109.49. HRMS (ESI):  $m/z$ : calcd for  $\text{C}_{15}\text{H}_{11}\text{FN}_4\text{Na}$  ( $\text{M}+\text{Na}$ ) $^+$  289.0860; found 289.0859

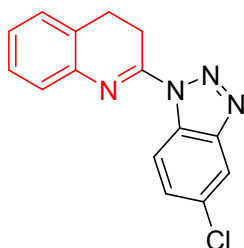

**2-(5-chloro-1H-benzo[d][1,2,3]triazol-1-yl)-3,4-dihydroquinoline (3t):**  $R_f = 0.25$  (Petroleum ether/EtOAc, 5:1). 38.3 mg, 47% yield. White solid.  $^1\text{H NMR}$  (400 MHz, Chloroform-*d*)  $\delta$  8.80 (s, 1H), 8.04 (d,  $J = 9.1$  Hz, 1H), 7.48 (t,  $J = 7.3$  Hz, 2H), 7.37 – 7.30 (m, 1H), 7.23 (d,  $J = 4.3$  Hz, 2H), 3.53 (t,  $J = 8.5$  Hz, 2H), 3.12 (t,  $J = 8.5$  Hz, 2H).  $^{13}\text{C NMR}$  (151 MHz, Chloroform-*d*)  $\delta$  156.2, 145.3, 142.3, 135.6, 131.8, 127.8, 127.7, 127.4, 126.9, 126.8, 126.6, 120.6, 115.9, 24.1, 23.3. HRMS (ESI):  $m/z$ : calcd for  $\text{C}_{15}\text{H}_{11}\text{ClN}_4\text{Na}$  ( $\text{M}+\text{Na}$ ) $^+$  305.0564; found 305.0566

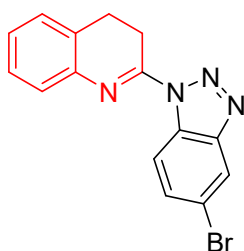

**2-(5-bromo-1H-benzo[d][1,2,3]triazol-1-yl)-3,4-dihydroquinoline (3u):**  $R_f = 0.25$



(Petroleum ether/EtOAc, 5:1). 32.0 mg, 35% yield. White solid.  $^1\text{H}$  NMR (400 MHz, Chloroform-*d*)  $\delta$  8.96 (d,  $J = 1.8$  Hz, 1H), 7.97 (d,  $J = 8.7$  Hz, 1H), 7.60 (dd,  $J = 8.8, 1.9$  Hz, 1H), 7.48 (d,  $J = 7.7$  Hz, 1H), 7.33 (dd,  $J = 8.0, 4.3$  Hz, 1H), 7.23 (d,  $J = 4.5$  Hz, 2H), 3.52 (t,  $J = 8.5$  Hz, 2H), 3.11 (t,  $J = 8.5$  Hz, 2H).  $^{13}\text{C}$  NMR (101 MHz, Chloroform-*d*)  $\delta$  156.1, 145.6, 142.3, 132.1, 129.2, 127.8, 127.7, 127.4, 126.9, 126.8, 123.7, 120.8, 118.9, 24.1, 23.3. HRMS (ESI):  $m/z$ : calcd for  $\text{C}_{15}\text{H}_{11}\text{BrN}_4\text{Na}$  ( $\text{M}+\text{Na}$ ) $^+$  349.0059; found 349.0057

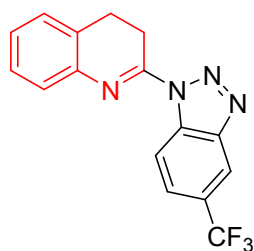

**2-(1*H*-benzo[*d*][1,2,3]triazol-1-yl)-5-(trifluoromethyl)-3,4-dihydroquinoline (3v):**  $R_f = 0.25$  (Petroleum ether/EtOAc, 5:1). 28.4 mg, 30% yield. White solid.  $^1\text{H}$  NMR (600 MHz, Chloroform-*d*)  $\delta$  9.12 (s, 1H), 8.25 (d,  $J = 8.6$  Hz, 1H), 7.74 (dd,  $J = 8.7, 1.7$  Hz, 1H), 7.49 (d,  $J = 7.7$  Hz, 1H), 7.38 – 7.32 (m, 1H), 7.26 – 7.24 (m, 2H), 3.56 (t,  $J = 8.5$  Hz, 2H), 3.14 (t,  $J = 8.5$  Hz, 2H).  $^{13}\text{C}$  NMR (151 MHz, Chloroform-*d*)  $\delta$  156.1, 147.9, 142.1, 131.2 (q,  $J = 32.5$  Hz), 130.7, 127.9, 127.8, 127.7, 127.0, 126.8, 123.9 (q,  $J = 271.8$  Hz), 122.4 (q,  $J = 3.6$  Hz), 120.7, 114.3 (q,  $J = 4.7$  Hz), 24.1, 23.4.  $^{19}\text{F}$  NMR (565 MHz, Chloroform-*d*)  $\delta$  -61.62. HRMS (ESI):  $m/z$ : calcd for  $\text{C}_{16}\text{H}_{11}\text{F}_3\text{N}_4\text{Na}$  ( $\text{M}+\text{Na}$ ) $^+$  339.0828; found 339.0831

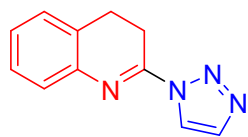

**2-(1*H*-1,2,3-triazol-1-yl)-3,4-dihydroquinoline (3w):**  $R_f = 0.25$  (Petroleum ether/EtOAc, 5:1). 19.1 mg, 32% yield. White solid.  $^1\text{H}$  NMR (600 MHz, Chloroform-*d*)  $\delta$  8.62 (d,  $J = 1.2$  Hz, 1H), 7.82 (d,  $J = 1.3$  Hz, 1H), 7.35 (d,  $J = 7.7$  Hz, 1H), 7.30 (dd,  $J = 7.8, 6.1, 2.8$  Hz, 1H), 7.24 – 7.20 (m, 2H), 3.41 (t,  $J = 8.5$  Hz, 2H), 3.06 (t,  $J = 8.5$  Hz, 2H).  $^{13}\text{C}$  NMR (151 MHz, Chloroform-*d*)  $\delta$  154.2, 141.9, 139.7, 137.1, 134.2, 127.8, 126.9, 120.7, 112.8, 24.0, 22.8. HRMS (ESI):  $m/z$ : calcd for  $\text{C}_{11}\text{H}_{10}\text{N}_4\text{Na}$  ( $\text{M}+\text{Na}$ ) $^+$  221.0798; found 221.0797

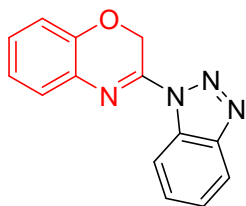

**3-(1*H*-benzo[*d*][1,2,3]triazol-1-yl)-2*H*-benzo[*b*][1,4]oxazine (3x):**  $R_f = 0.25$  (Petroleum ether/EtOAc, 5:1). 60.0 mg, 83% yield. White solid.  $^1\text{H}$  NMR (600 MHz, Chloroform-*d*)  $\delta$  8.65 (d,  $J = 8.3$  Hz, 1H), 8.14 (d,  $J = 8.3$  Hz, 1H), 7.68 (t,  $J = 7.7$  Hz, 1H), 7.52 (t,  $J = 7.7$  Hz, 1H), 7.43 (dd,  $J = 7.8, 1.6$  Hz, 1H), 7.19 (td,  $J = 7.7, 1.6$  Hz, 1H), 7.06 (td,  $J = 7.6, 1.4$  Hz, 1H), 6.99 (dd,  $J = 8.0, 1.5$  Hz, 1H), 5.58 (s, 2H).  $^{13}\text{C}$  NMR (151 MHz, Chloroform-*d*)  $\delta$  149.1, 146.4, 146.0, 131.5, 130.9, 129.7, 128.8, 127.3, 126.0, 122.7, 120.1, 116.0, 115.3, 61.1. HRMS (ESI):  $m/z$ : calcd for  $\text{C}_{14}\text{H}_{10}\text{N}_4\text{ONa}$  ( $\text{M}+\text{Na}$ ) $^+$  273.0747; found 273.0747

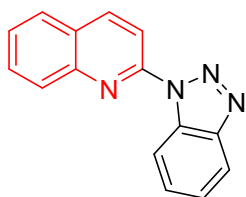

**2-(1*H*-benzo[*d*][1,2,3]triazol-1-yl)quinoline (4a)<sup>4</sup>:**  $R_f = 0.25$  (Petroleum ether/EtOAc, 5:1). 42.6 mg, 60% yield. White solid.  $^1\text{H}$  NMR (600 MHz, Chloroform-*d*)  $\delta$  8.97 (d,  $J = 8.3$  Hz, 1H), 8.50 (d,  $J = 8.8$  Hz, 1H), 8.38 (d,  $J = 8.8$  Hz, 1H), 8.18 – 8.14 (m, 2H), 7.90 (d,  $J = 8.1$  Hz, 1H), 7.80 (m,  $J = 8.4, 6.8, 1.5$  Hz, 1H), 7.69 (t,  $J = 7.7$  Hz, 1H), 7.59 (t,  $J = 7.5$  Hz, 1H), 7.51 (t,  $J = 7.6$  Hz, 1H).  $^{13}\text{C}$  NMR (151 MHz, Chloroform-*d*)  $\delta$  150.4, 146.9, 146.5, 139.1, 131.6, 130.5, 128.9, 128.8, 127.7, 127.0, 126.6, 125.1, 119.8, 115.4, 113.4.

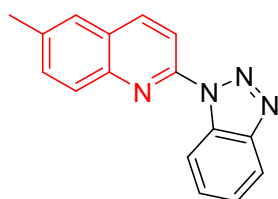

**2-(1*H*-benzo[*d*][1,2,3]triazol-1-yl)-6-methylquinoline (4b)<sup>4</sup>:**  $R_f = 0.25$  (Petroleum ether/EtOAc, 5:1). 36.0 mg, 49% yield. White solid.  $^1\text{H}$  NMR (600 MHz, Chloroform-*d*)  $\delta$  8.96 (d,  $J = 8.3$  Hz, 1H), 8.45 (dd,  $J = 8.7, 2.3$  Hz, 1H), 8.29 (d,  $J = 8.7$  Hz, 1H), 8.16 (d,  $J = 8.3$  Hz,

1H), 8.06 (d,  $J = 8.4$  Hz, 1H), 7.67 (d,  $J = 8.0$  Hz, 2H), 7.63 (d,  $J = 8.7$  Hz, 1H), 7.50 (t,  $J = 7.6$  Hz, 1H), 2.58 (s, 3H).  $^{13}\text{C}$  NMR (151 MHz, Chloroform- $d$ )  $\delta$  149.9, 146.9, 145.0, 138.5, 136.7, 132.7, 131.6, 128.9, 128.5, 127.1, 126.7, 125.1, 119.8, 115.4, 113.4, 21.6.

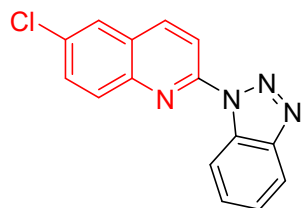

**2-(1H-benzo[ $d$ ][1,2,3]triazol-1-yl)-6-chloroquinoline (4c)<sup>4</sup>:**  $R_f = 0.25$  (Petroleum ether/EtOAc, 5:1). 42.0 mg, 52% yield. White solid.  $^1\text{H}$  NMR (600 MHz, Chloroform- $d$ )  $\delta$  8.89 (d,  $J = 8.3$  Hz, 1H), 8.50 (d,  $J = 8.9$  Hz, 1H), 8.26 (d,  $J = 8.9$  Hz, 1H), 8.15 (d,  $J = 8.3$  Hz, 1H), 8.07 (d,  $J = 8.9$  Hz, 1H), 7.85 (d,  $J = 2.3$  Hz, 1H), 7.71 (dd,  $J = 8.9, 2.3$  Hz, 1H), 7.69 – 7.63 (m, 1H), 7.53 – 7.45 (m, 1H).  $^{13}\text{C}$  NMR (151 MHz, Chloroform- $d$ )  $\delta$  150.6, 146.9, 144.9, 138.2, 132.3, 131.5, 131.4, 130.3, 129.1, 127.6, 126.5, 125.3, 119.9, 115.3, 114.3.

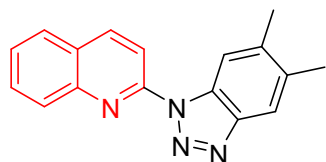

**2-(5,6-dimethyl-1H-benzo[ $d$ ][1,2,3]triazol-1-yl)quinoline (4d)<sup>5</sup>:**  $R_f = 0.25$  (Petroleum ether/EtOAc, 5:1). 32.9 mg, 40% yield. White solid.  $^1\text{H}$  NMR (600 MHz, Chloroform- $d$ )  $\delta$  8.71 (s, 1H), 8.48 (d,  $J = 8.9$  Hz, 1H), 8.37 (d,  $J = 8.9$  Hz, 1H), 8.20 (d,  $J = 8.4$  Hz, 1H), 7.90 (d,  $J = 7.3$  Hz, 2H), 7.80 (dd,  $J = 8.3, 6.8, 1.5$  Hz, 1H), 7.59 (t,  $J = 7.6$  Hz, 1H), 2.55 (s, 3H), 2.47 (s, 3H).  $^{13}\text{C}$  NMR (151 MHz, Chloroform- $d$ )  $\delta$  150.1, 146.6, 143.0, 141.7, 139.4, 139.10, 130.6, 130.4, 128.8, 127.8, 127.0, 126.5, 119.0, 114.8, 113.6, 21.1, 20.5.

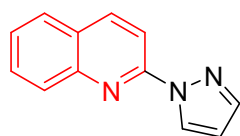

**(1H-pyrazol-1-yl)quinoline (4e)<sup>5</sup>:**  $R_f = 0.25$  (Petroleum ether/EtOAc, 5:1). 40.0 mg, 67% yield. White solid.  $^1\text{H}$  NMR (600 MHz, Chloroform- $d$ )  $\delta$  8.39 (s, 0.34H), 8.78 (d,  $J = 2.6$  Hz,

1H), 8.20 (q,  $J = 8.8$  Hz, 2H), 7.99 (d,  $J = 8.4$  Hz, 1H), 7.77 (d,  $J = 7.8$  Hz, 2H), 7.68 (t,  $J = 7.6$  Hz, 1H), 7.46 (t,  $J = 7.5$  Hz, 1H), 6.50 (t,  $J = 2.2$  Hz, 1H).  $^{13}\text{C}$  NMR (151 MHz, Chloroform- $d$ )  $\delta$  150.2, 146.6, 142.3, 139.0, 130.3, 128.5, 127.7, 127.4, 127.0, 125.9, 112.3, 108.2.

## 6. References

1. Bhattacharyya, D.; Nandi, S.; Adhikari, P.; Sarmah, B. K.; Konwar, M.; Das, A. *Org. Biomol. Chem.*, **2020**, *18*, 1214–1220.
2. Damschroder, R. and Peterson, W. *Organic Syntheses.*, **1940**, 16-16.
3. Yu, K.; Miao, B.; Wang, W.; Zakarian, A. *Org. Lett.*, **2019**, *21* (6), 1930-1934.
4. Sun, K.; Wang, X.; Liu, L.; Sun, J.; Liu, X.; Li, Z.; Zhang, Z.; Zhang, G. *ACS Catal.*, **2015**, *5* (12), 7194-7198.
5. Xie, L. Y.; Qu, J.; Peng, S.; Liu, K. J.; Wang, Z.; Ding, M. H.; Wang, Y.; Cao, Z.; He, W. M. *Green Chem.*, **2018**, *20* (3), 760-764.

## 7. NMR Spectra of Products

### <sup>1</sup>H-NMR Spectrum (600 MHz, CDCl<sub>3</sub>) of 3a

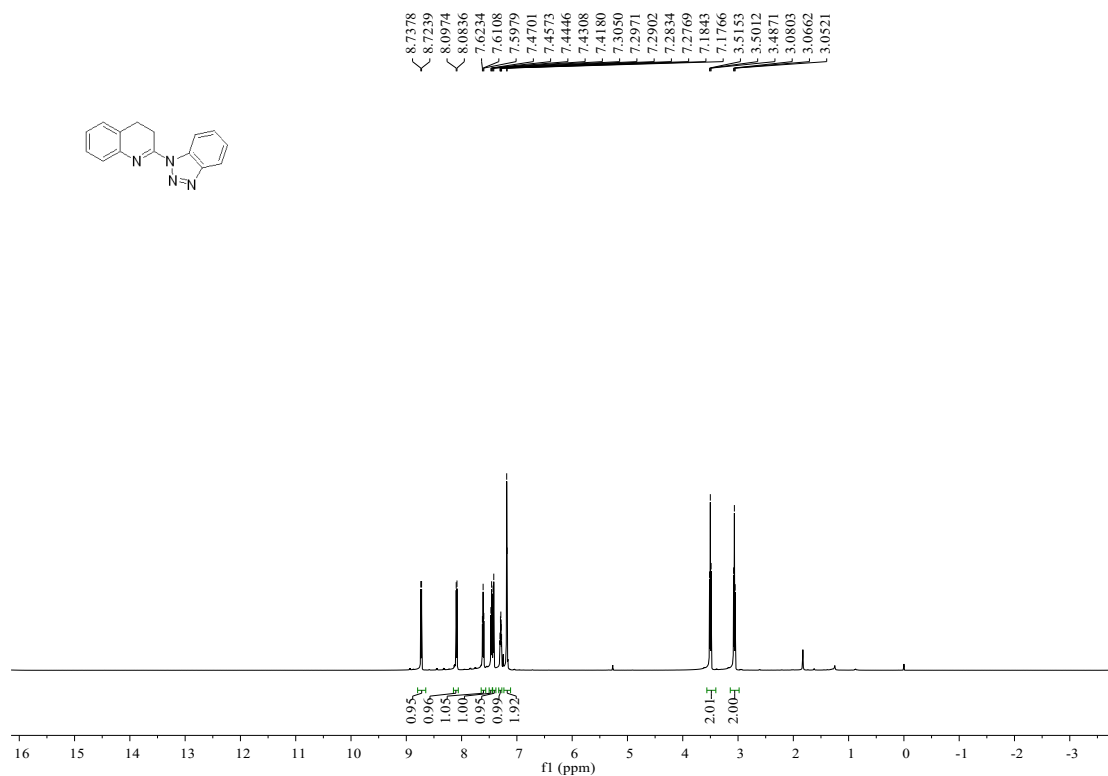

### <sup>13</sup>C-NMR Spectrum (151 MHz, CDCl<sub>3</sub>) of 3a

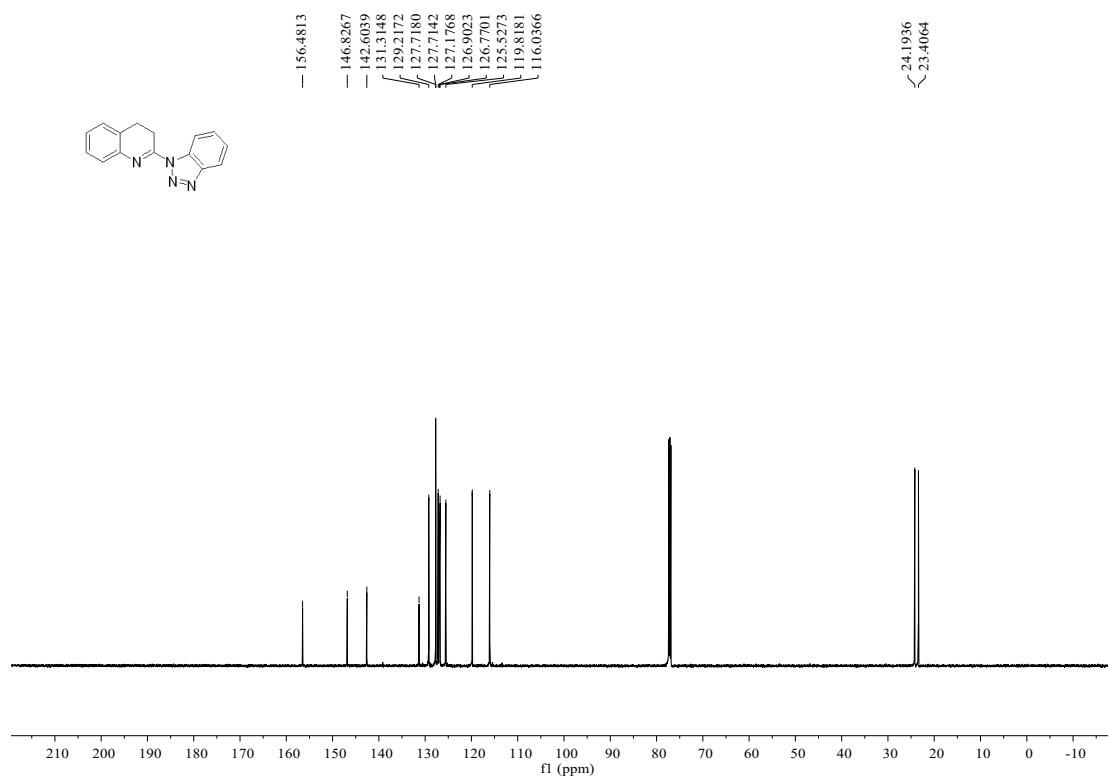

### <sup>1</sup>H-NMR Spectrum (400MHz, CDCl<sub>3</sub>) of 3b

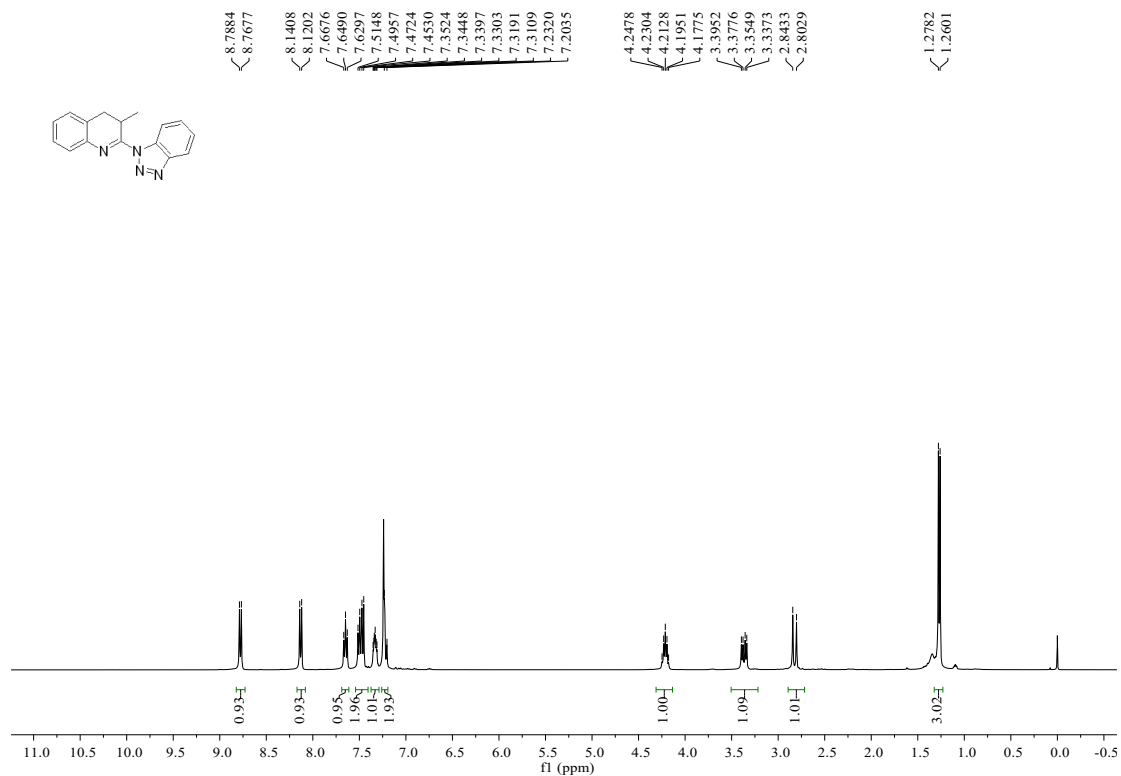

### <sup>13</sup>C-NMR Spectrum (101MHz, CDCl<sub>3</sub>) of 3b

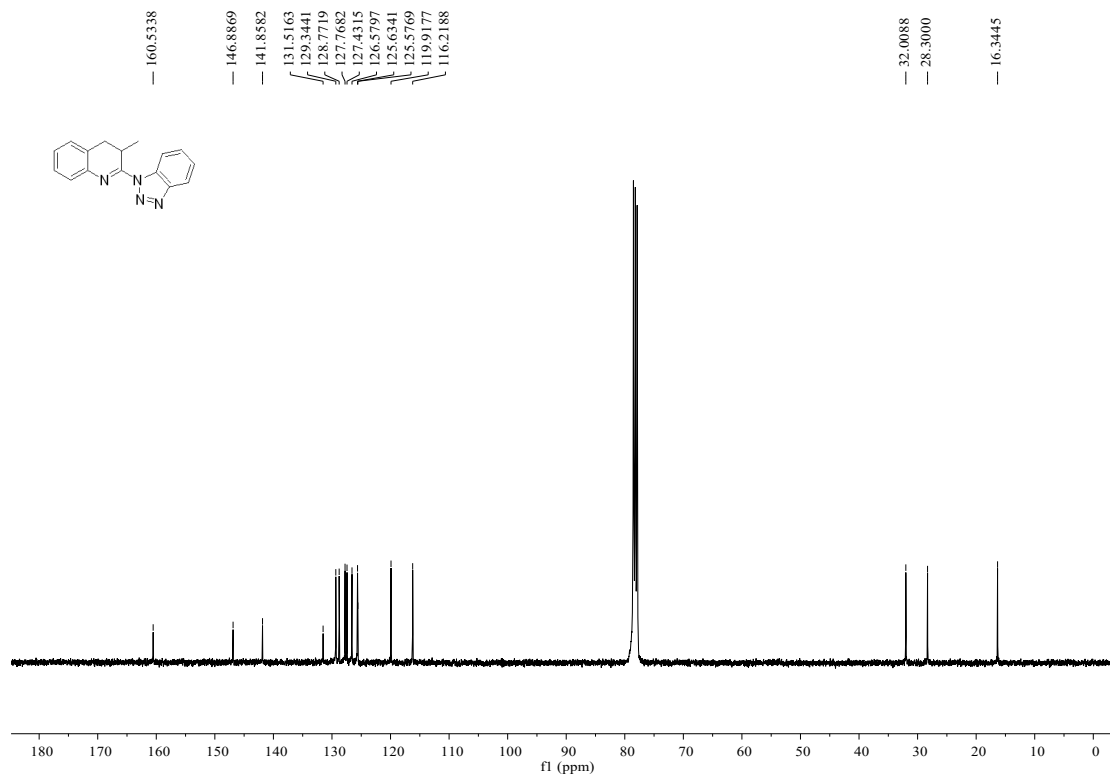

# <sup>1</sup>H-NMR Spectrum (600 MHz, CDCl<sub>3</sub>) of 3c

YD-1H-14.f1d  
YD-02-12-1

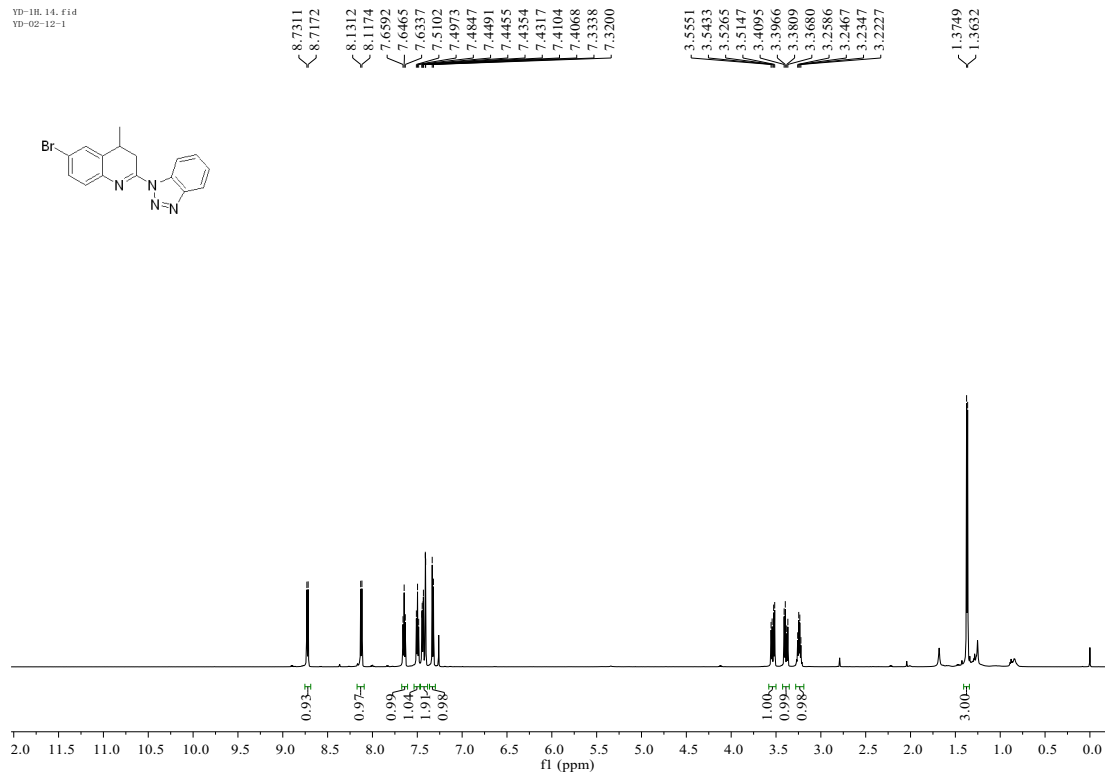

# <sup>13</sup>C-NMR Spectrum (151 MHz, CDCl<sub>3</sub>) of 3c

YD-13C-9.f1d  
YD-02-12-1

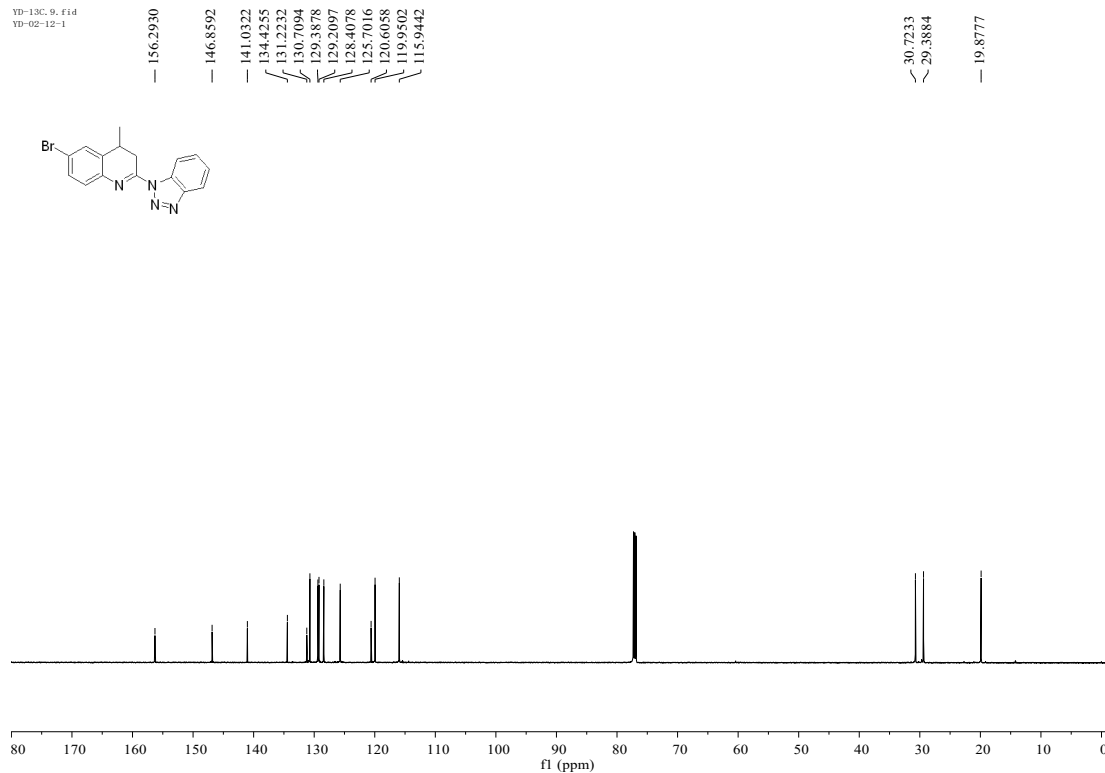

### <sup>1</sup>H-NMR Spectrum (400MHz, CDCl<sub>3</sub>) of 3d

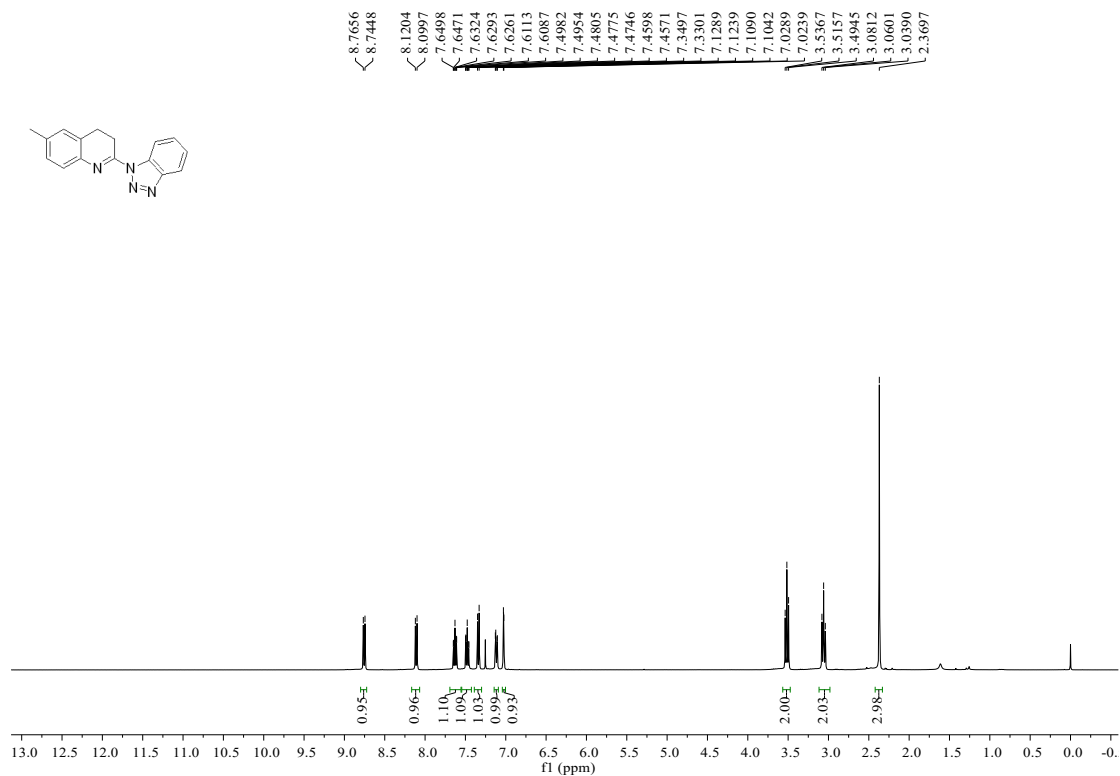

### <sup>13</sup>C-NMR Spectrum (151MHz, CDCl<sub>3</sub>) of 3d

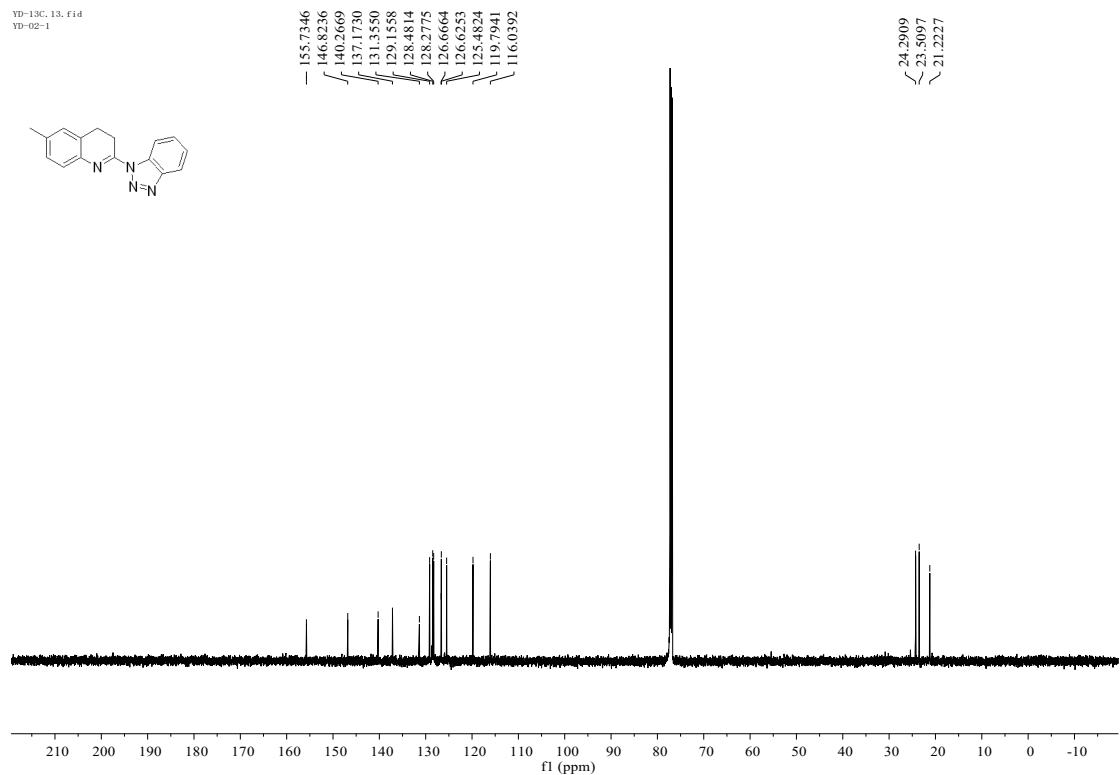



### <sup>1</sup>H-NMR Spectrum (600 MHz, CDCl<sub>3</sub>) of 3e

YD-1H\_18.fid  
YD-02-17-1

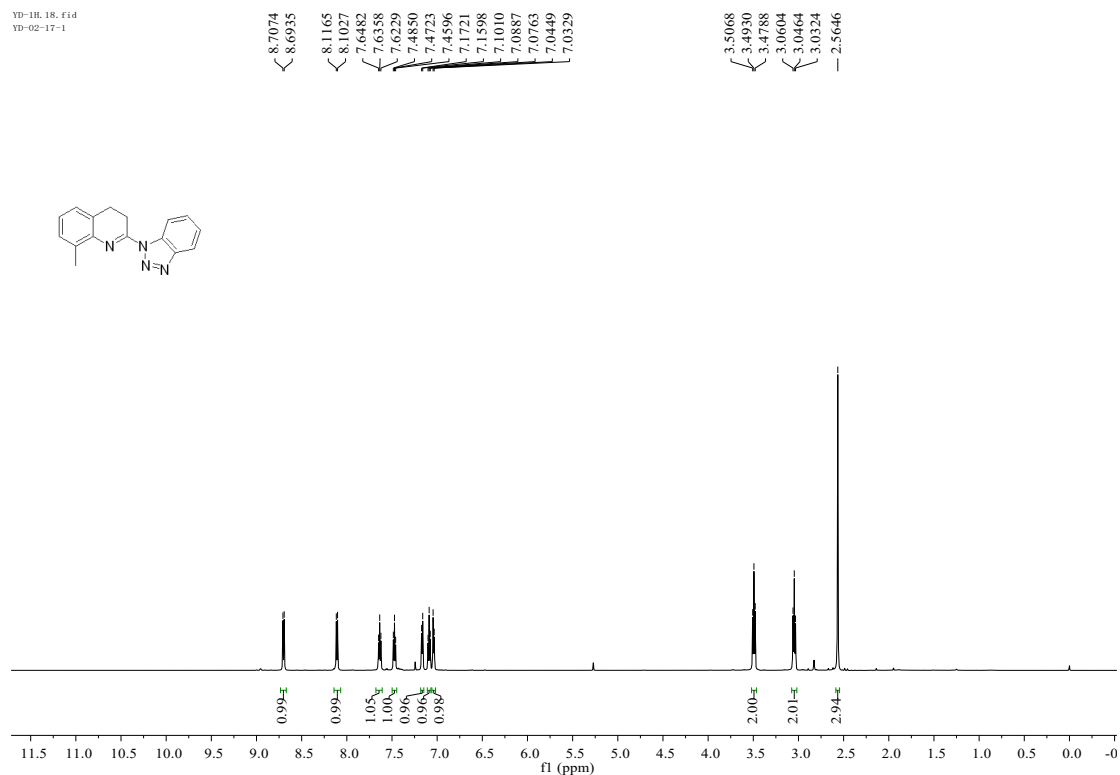

### <sup>13</sup>C-NMR Spectrum (151 MHz, CDCl<sub>3</sub>) of 3e

YD-13C\_11.fid  
YD-02-17-1

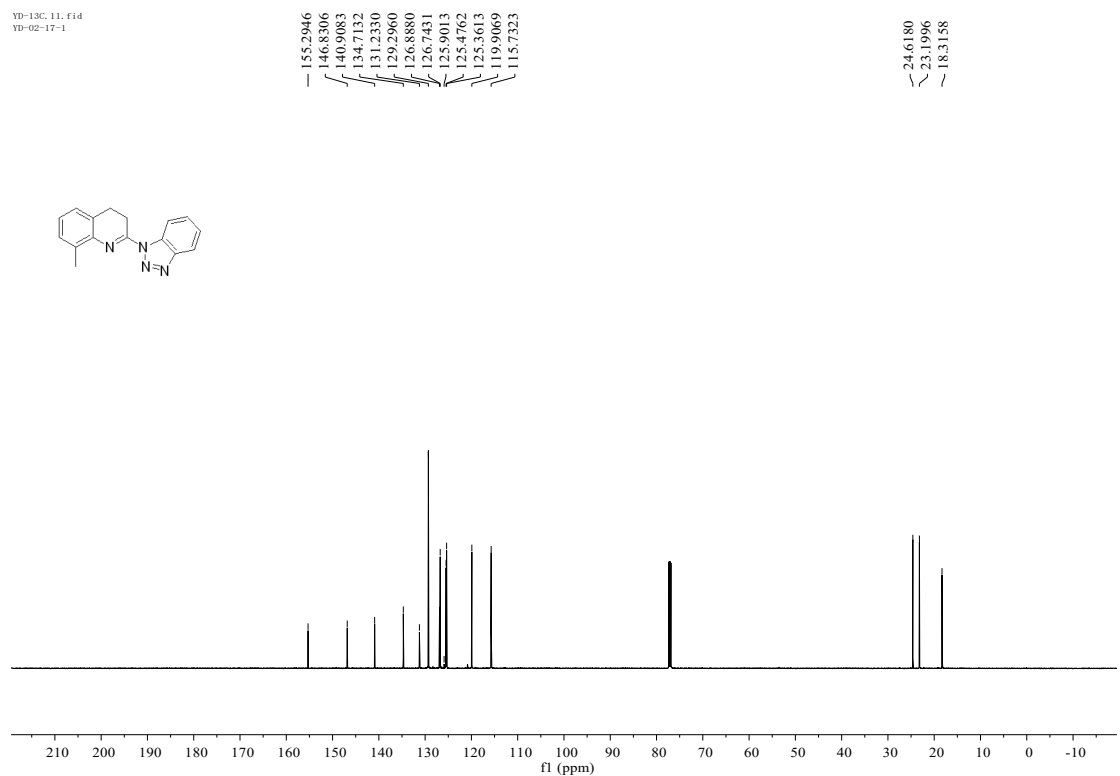

**<sup>1</sup>H-NMR Spectrum (400MHz, CDCl<sub>3</sub>) of 3f**

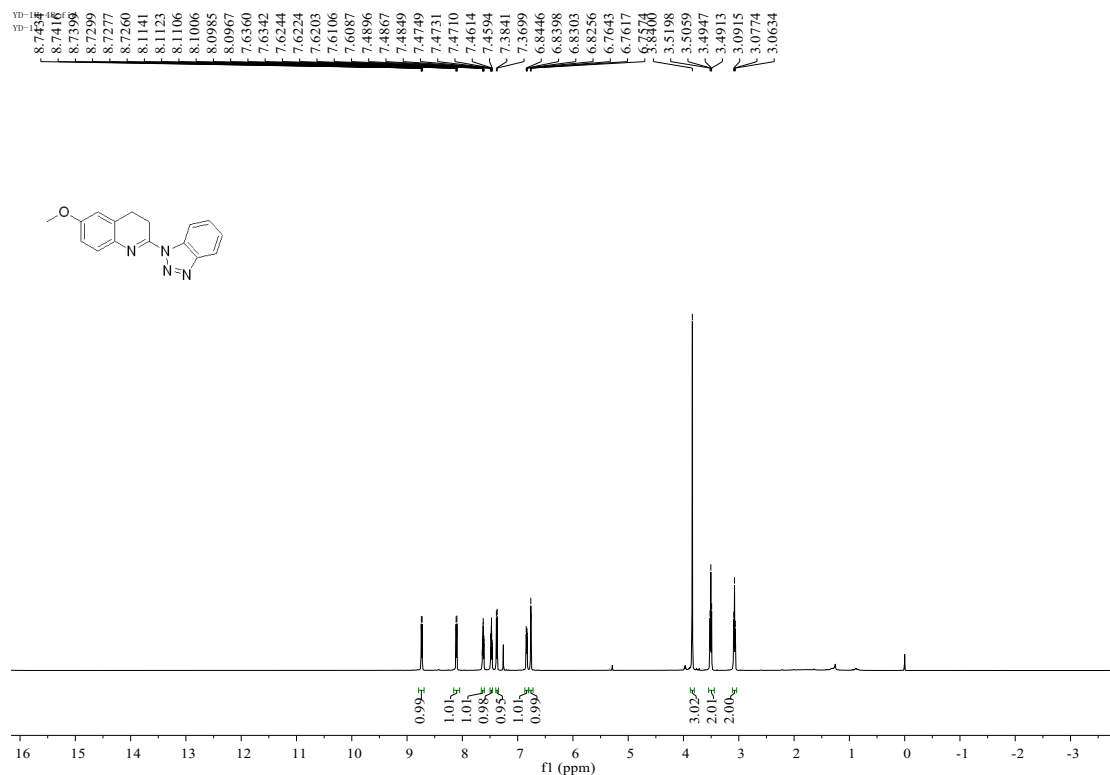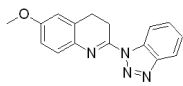

**<sup>13</sup>C-NMR Spectrum (101MHz, CDCl<sub>3</sub>) of 3f**

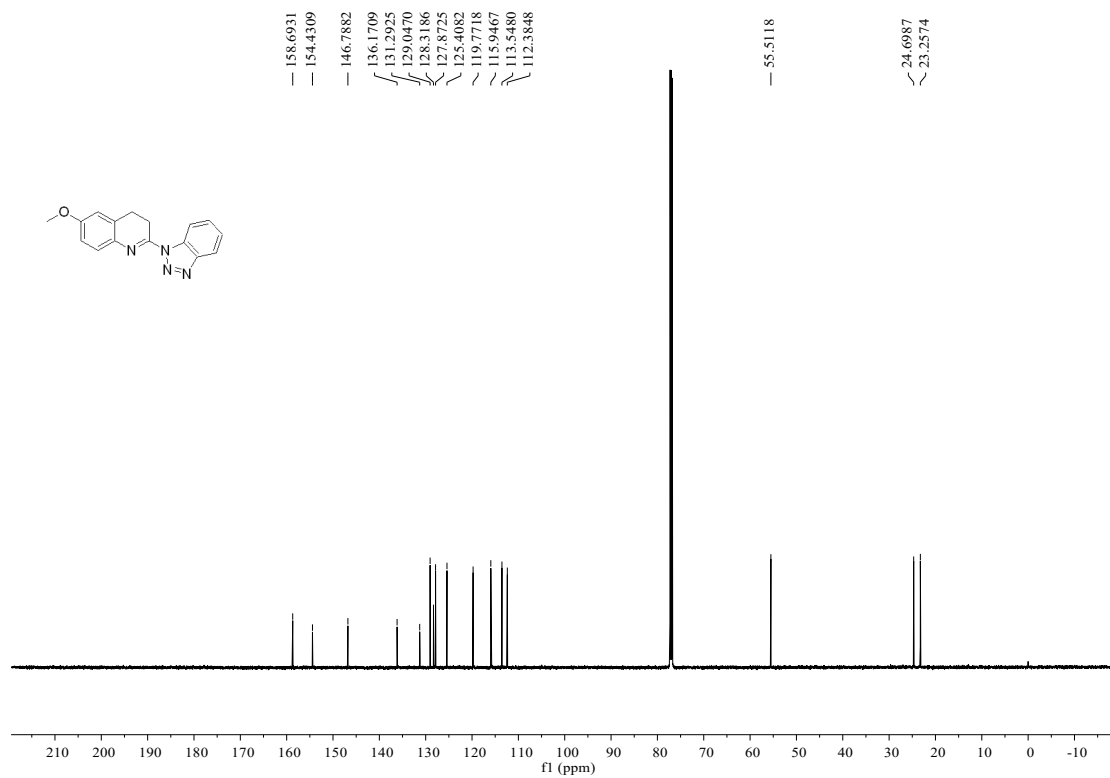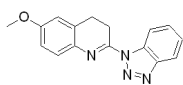

### <sup>1</sup>H-NMR Spectrum (600 MHz, CDCl<sub>3</sub>) of 3g

YD-1H\_89.f1d  
YD-2024-37-2

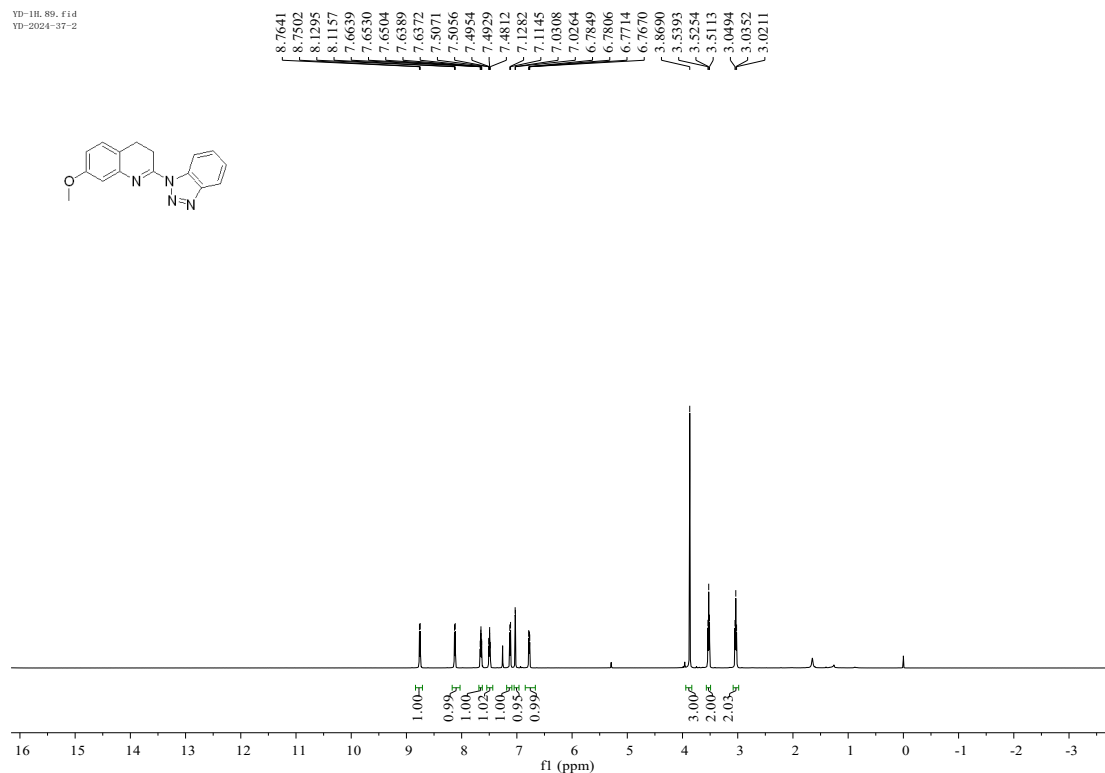

### <sup>13</sup>C-NMR Spectrum (151 MHz, CDCl<sub>3</sub>) of 3g

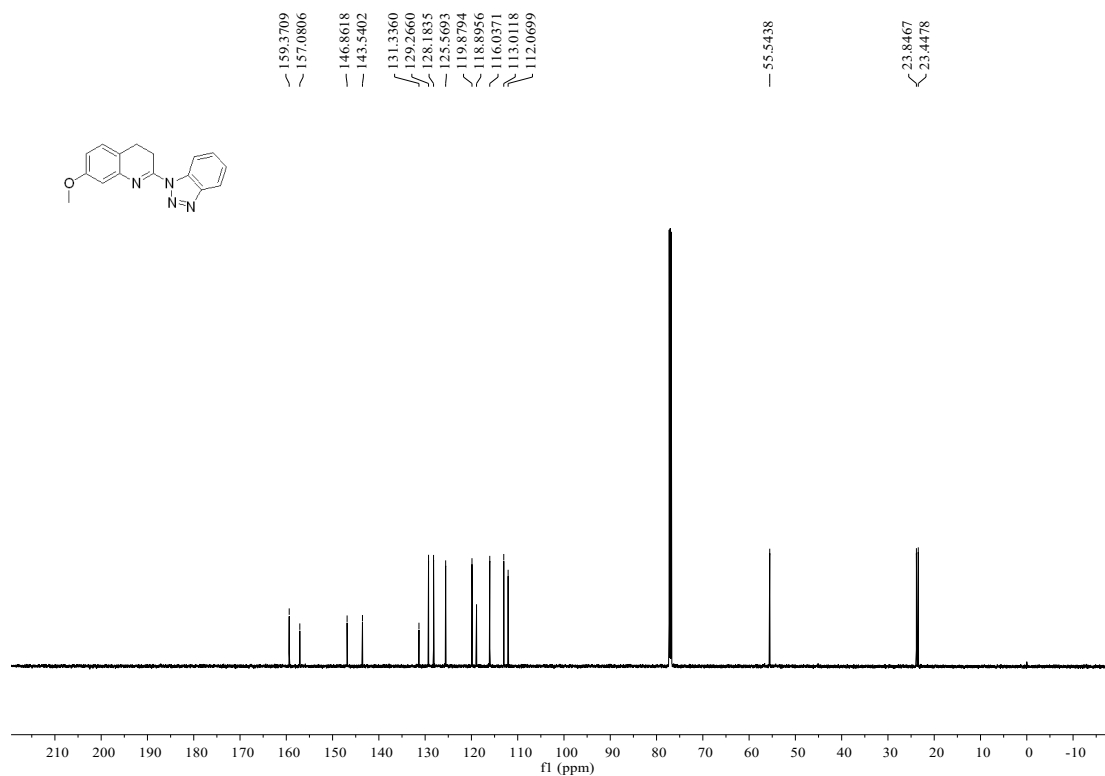

### <sup>1</sup>H-NMR Spectrum (600MHz, DMSO) of 3h

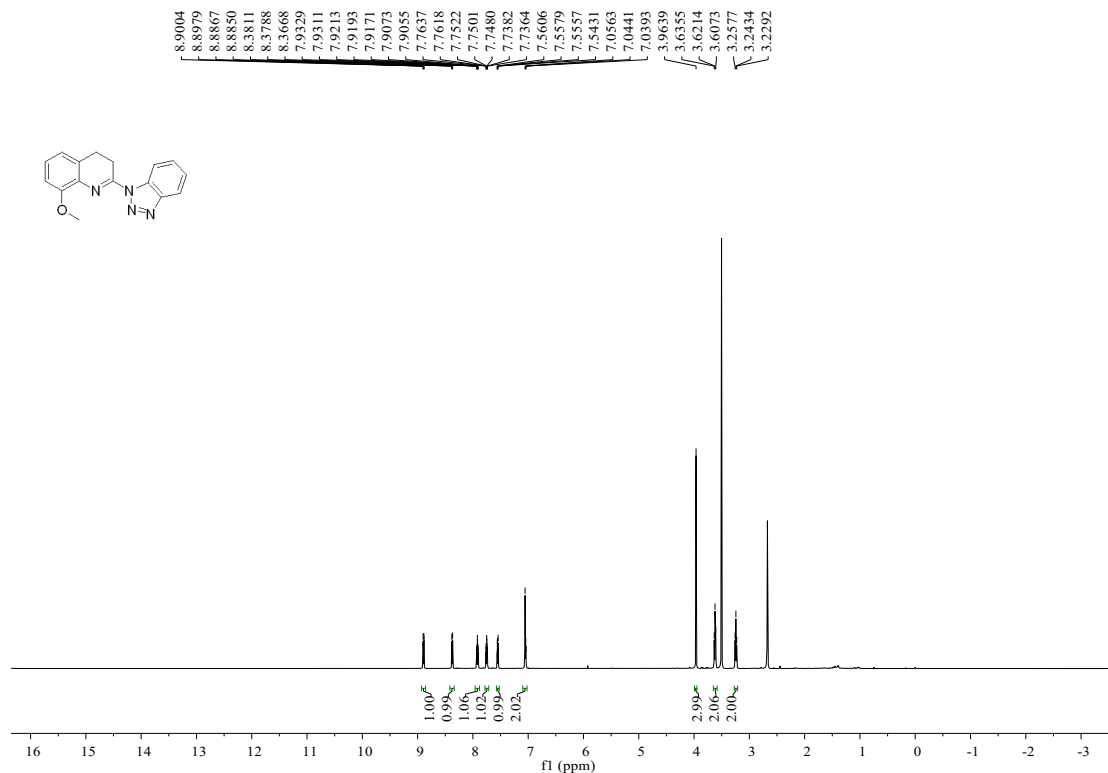

### <sup>13</sup>C-NMR Spectrum (151MHz, DMSO) of 3h

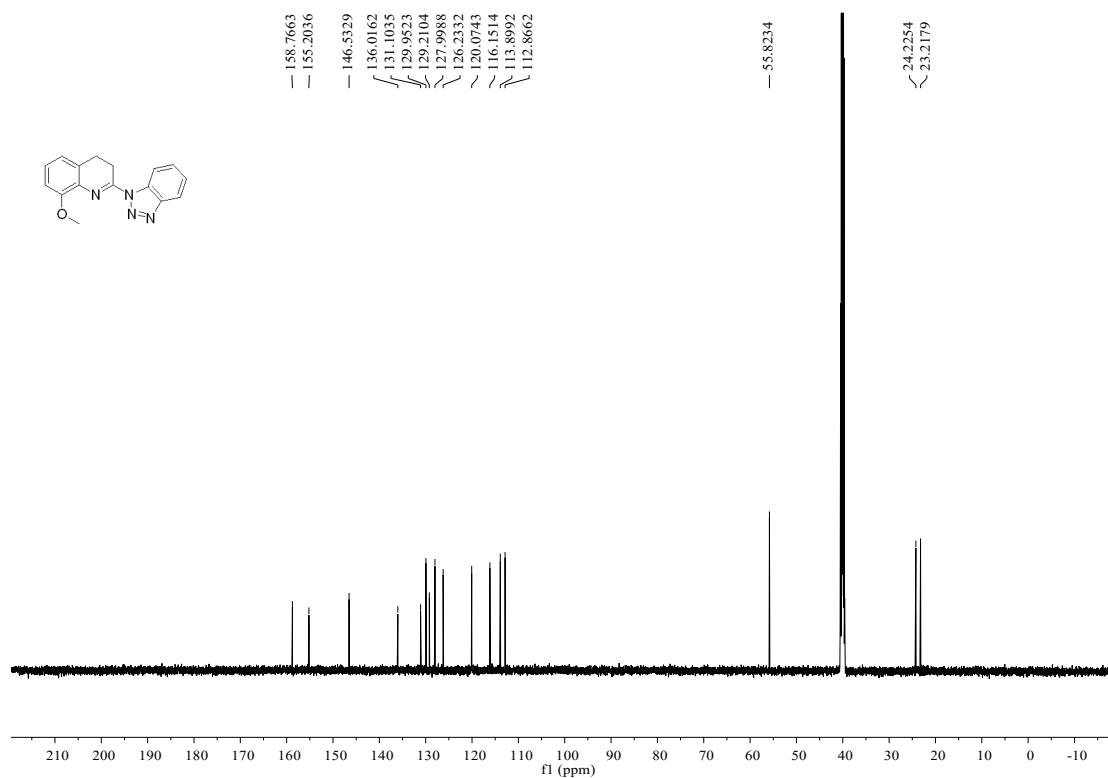

### <sup>1</sup>H-NMR Spectrum (600 MHz, CDCl<sub>3</sub>) of 3i

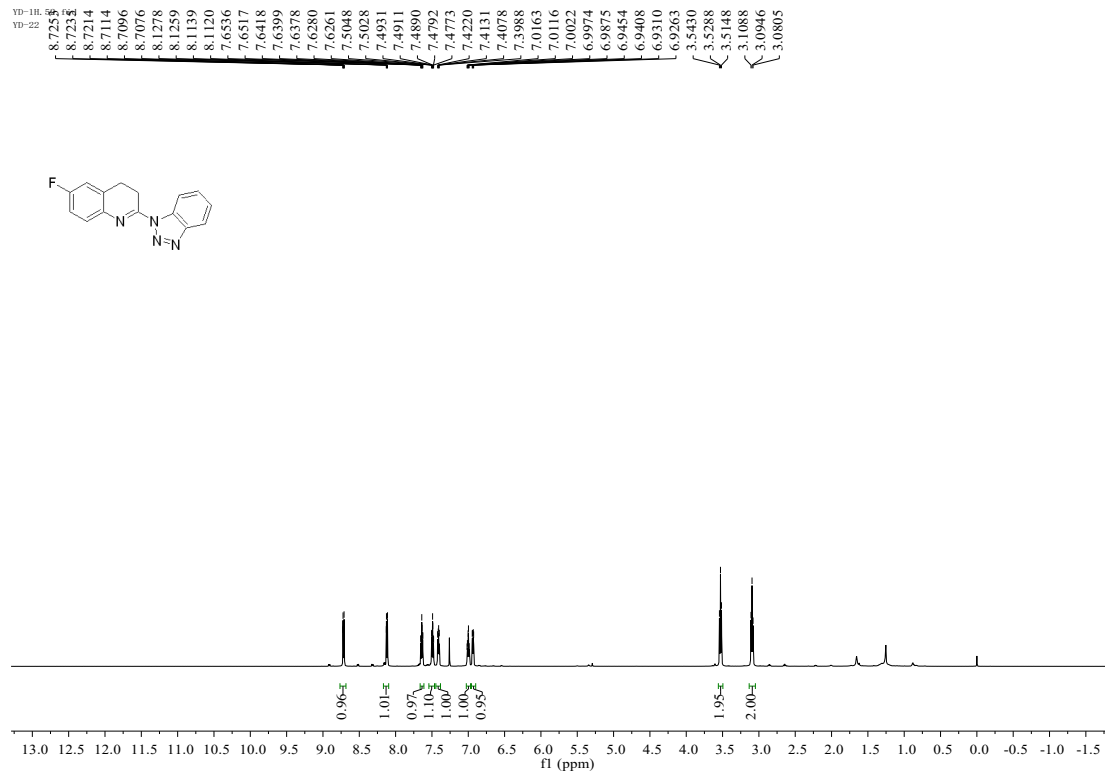

### <sup>13</sup>C-NMR Spectrum (151 MHz, CDCl<sub>3</sub>) of 3i

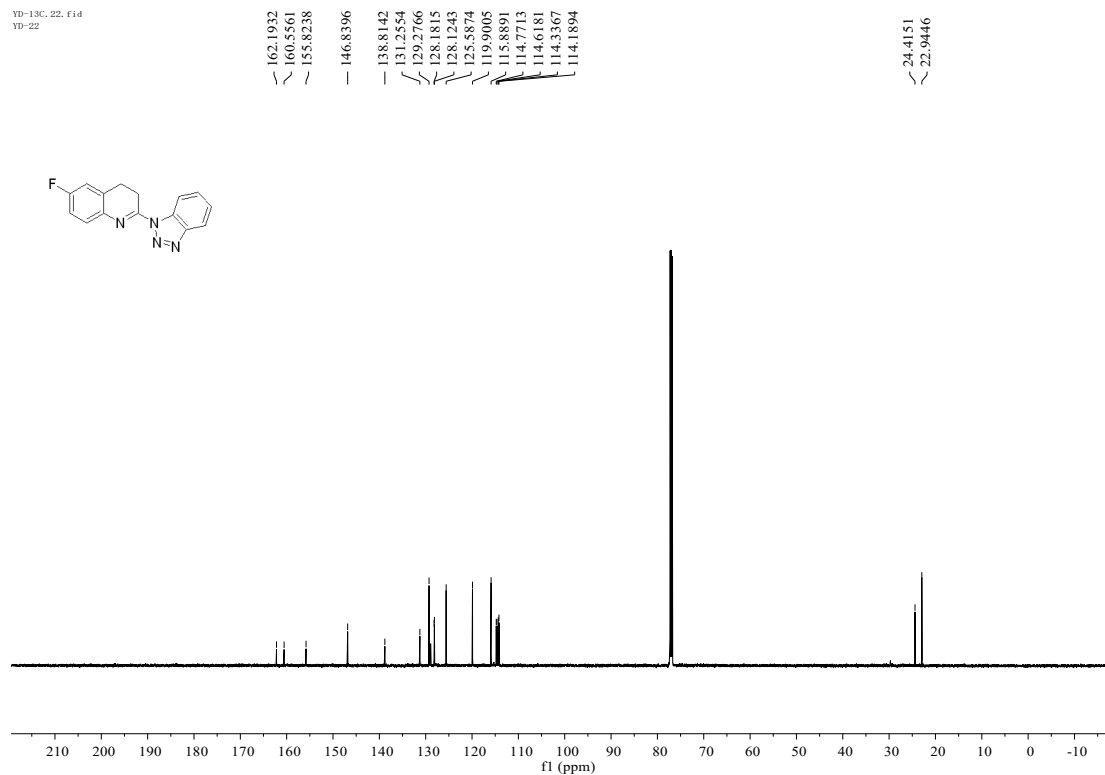

# <sup>1</sup>H-NMR Spectrum (600 MHz, CDCl<sub>3</sub>) of 3j

YD-IH\_50.f1d  
YD-20

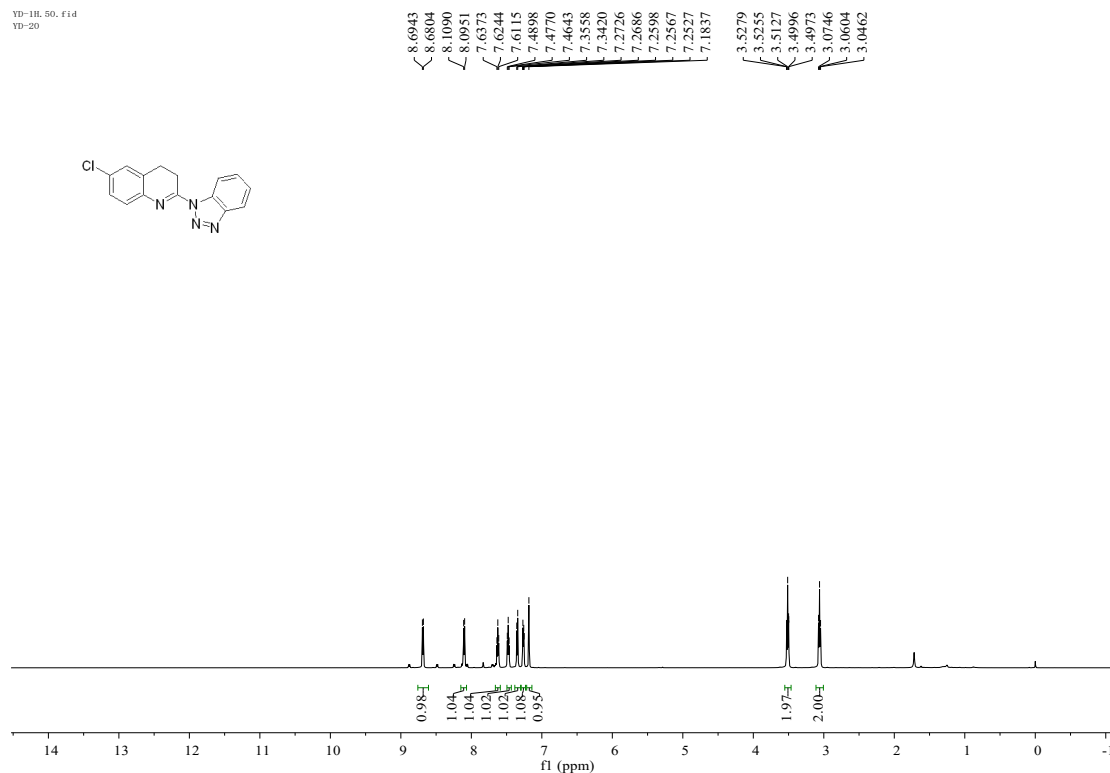

# <sup>13</sup>C-NMR Spectrum (151 MHz, CDCl<sub>3</sub>) of 3j

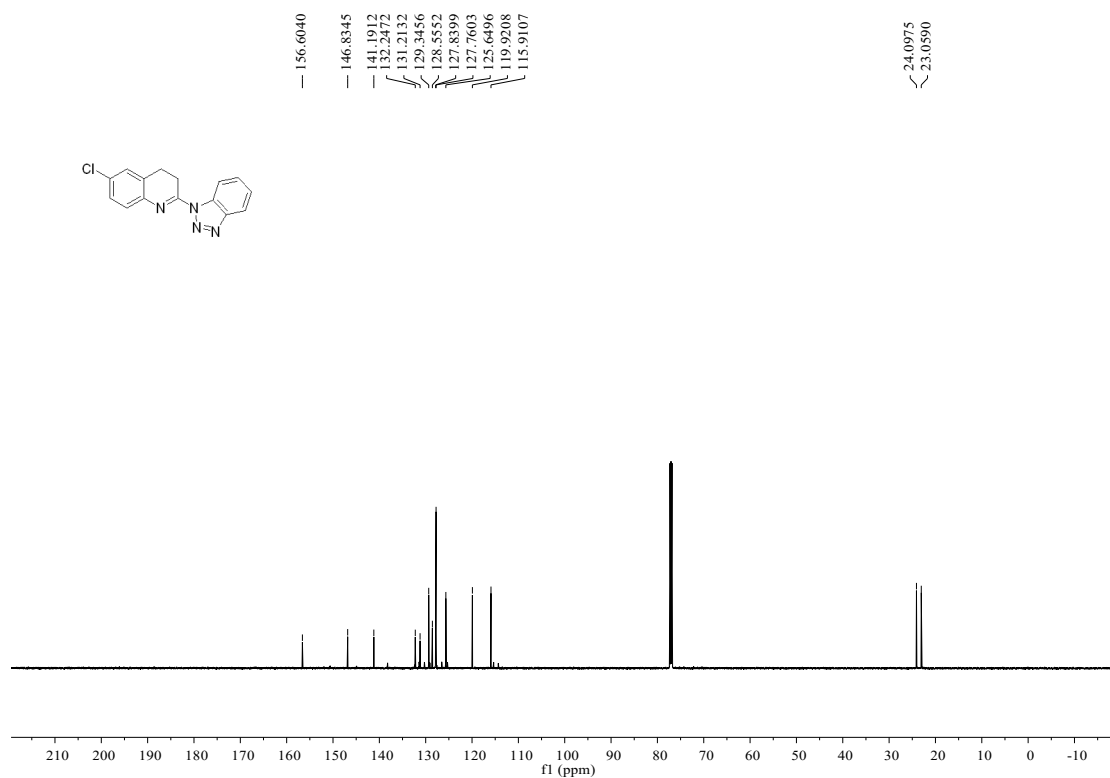

### <sup>1</sup>H-NMR Spectrum (400MHz, CDCl<sub>3</sub>) of 3k

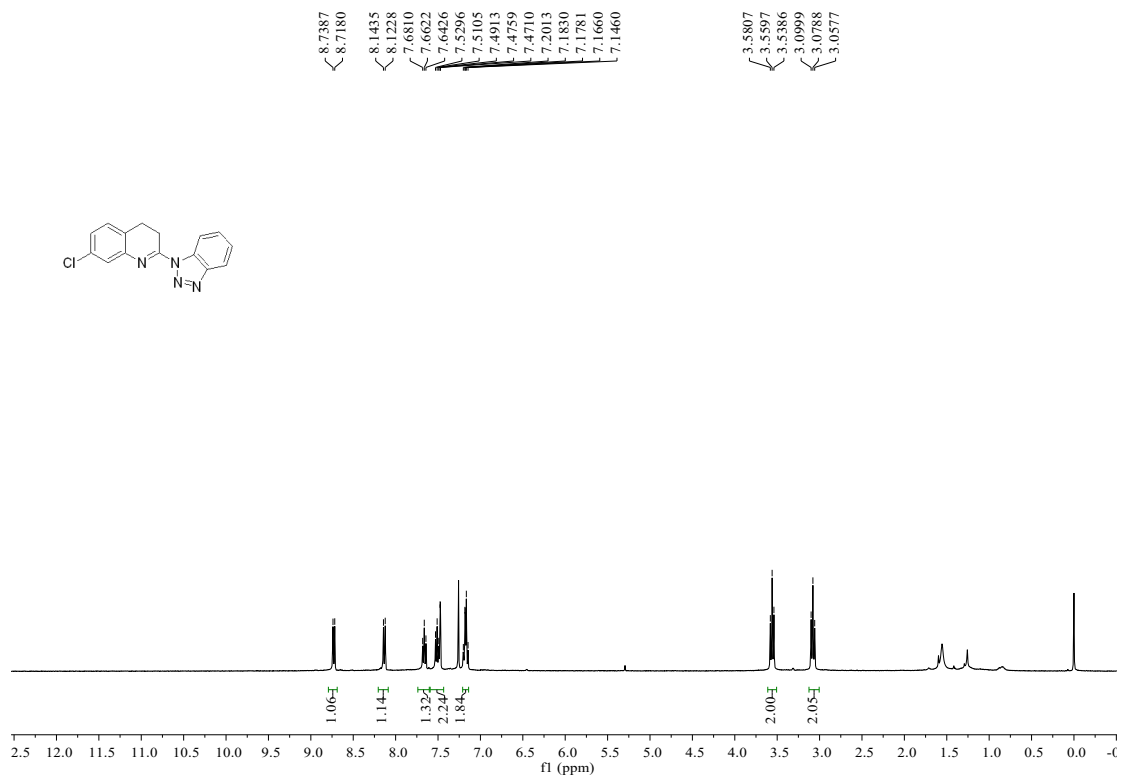

### <sup>13</sup>C-NMR Spectrum (151MHz, CDCl<sub>3</sub>) of 3k

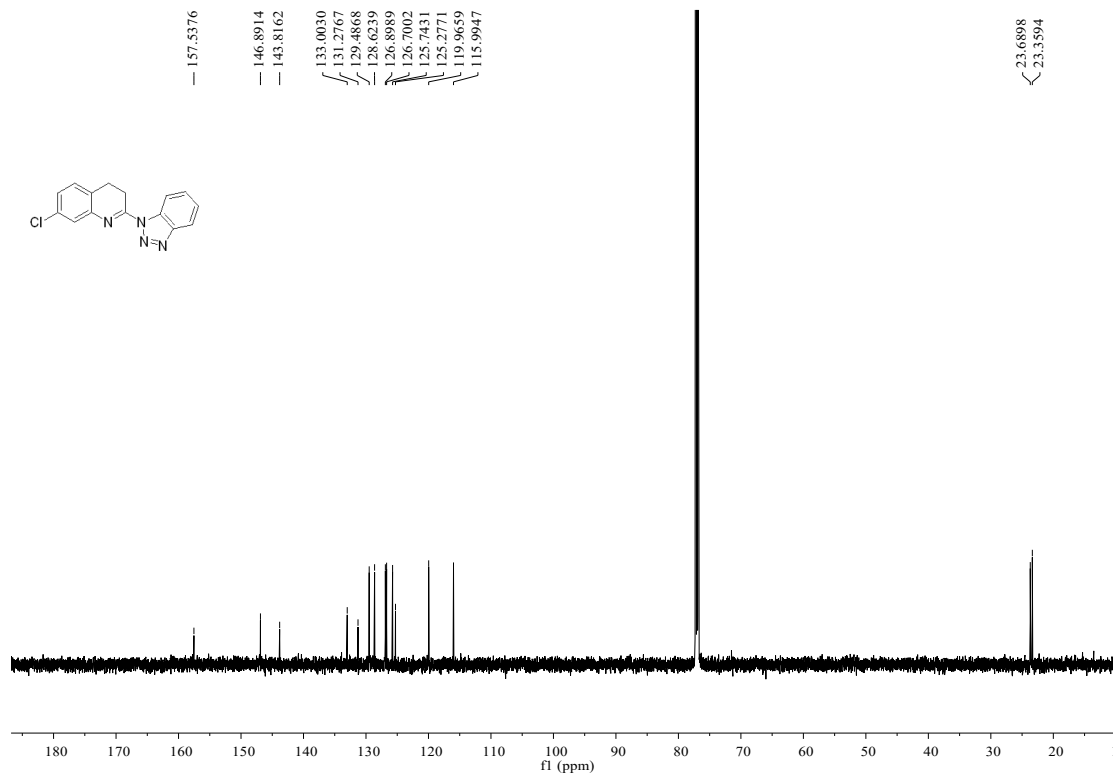

# <sup>1</sup>H-NMR Spectrum (600 MHz, CDCl<sub>3</sub>) of 3l

YD-1H\_20.f1d  
YD-02-17-2

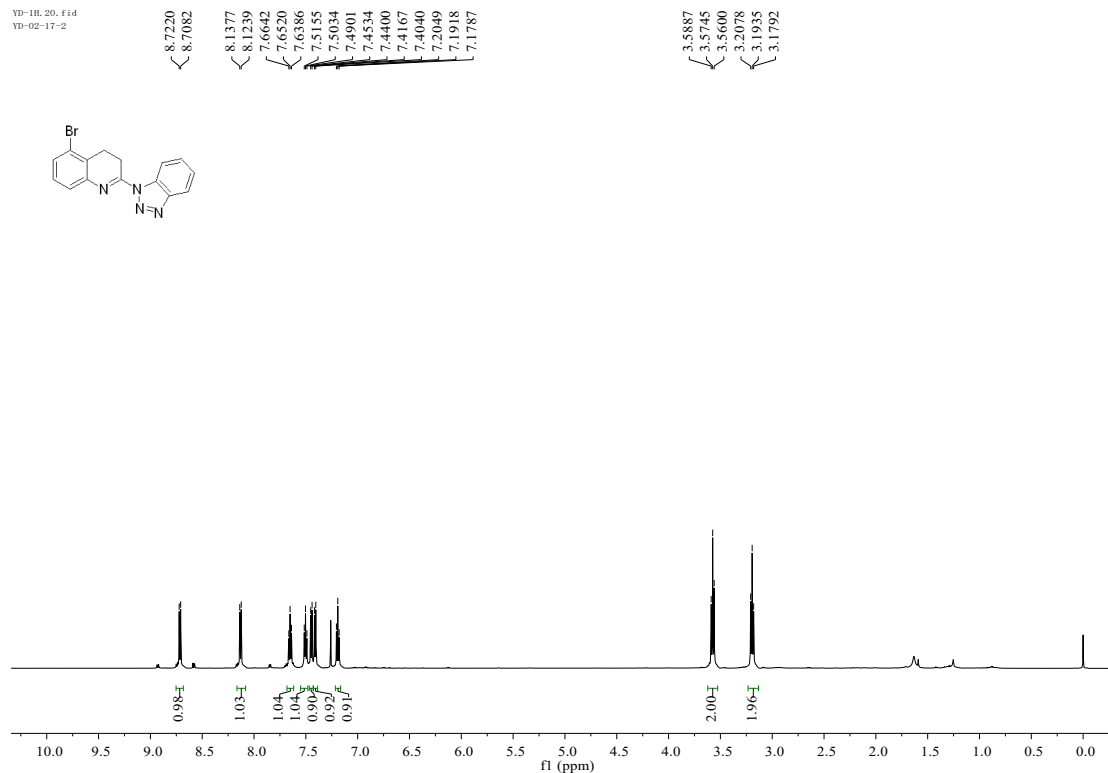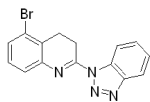

# <sup>13</sup>C-NMR Spectrum (151 MHz, CDCl<sub>3</sub>) of 3l

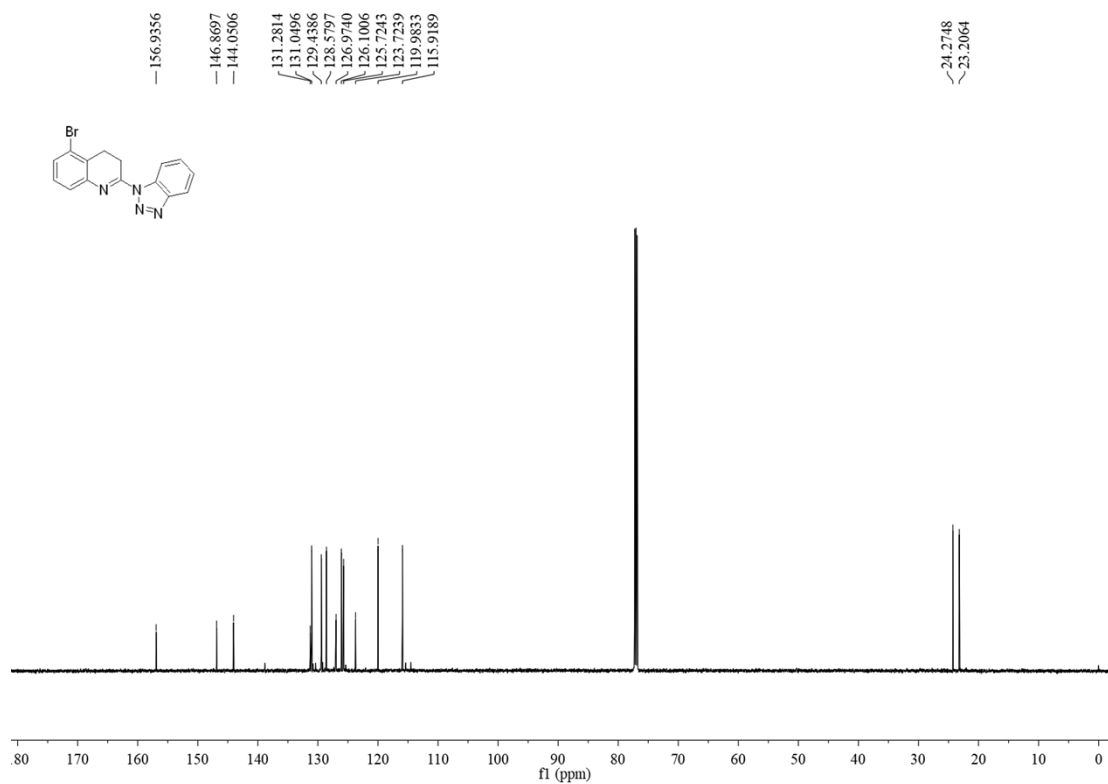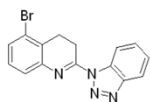



### <sup>1</sup>H-NMR Spectrum (600 MHz, CDCl<sub>3</sub>) of 3m

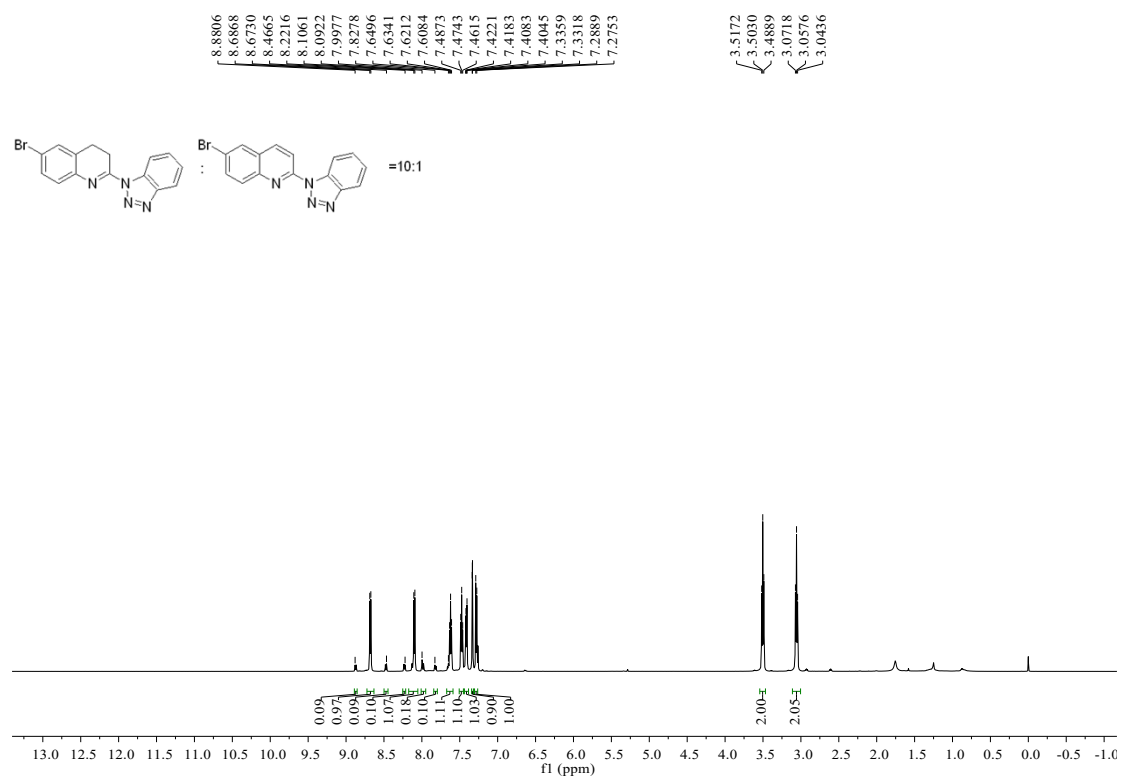

### <sup>13</sup>C-NMR Spectrum (151 MHz, CDCl<sub>3</sub>) of 3m

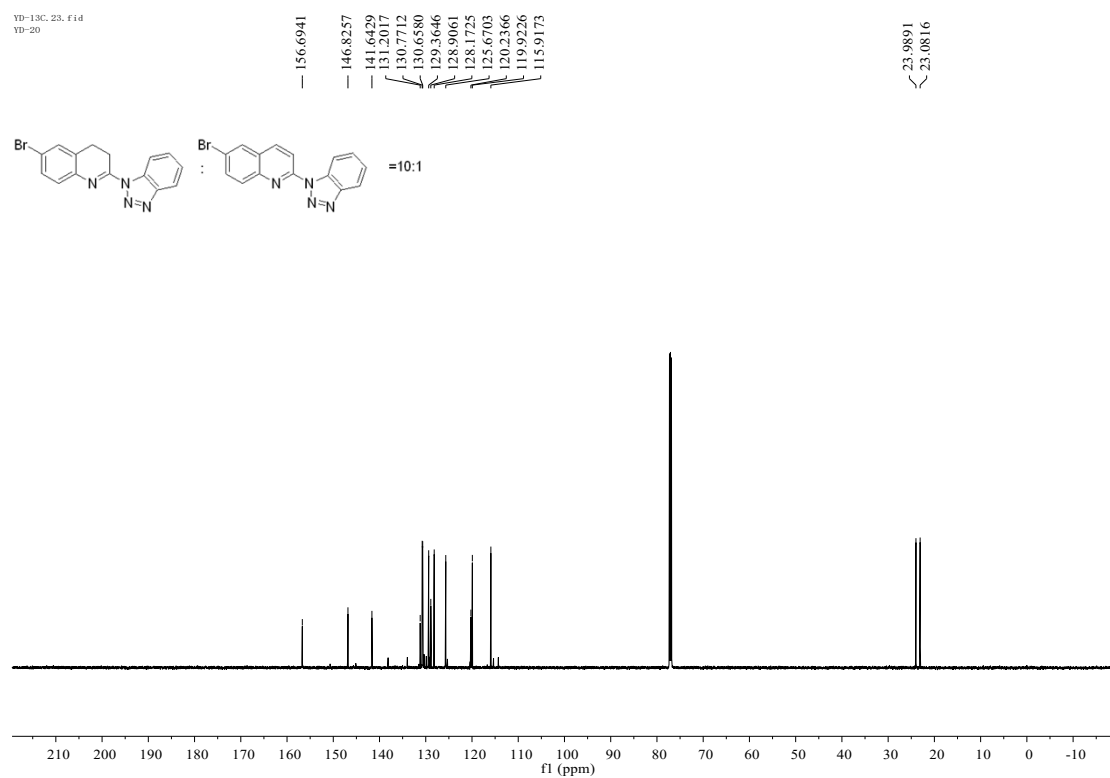

### <sup>1</sup>H-NMR Spectrum (600MHz, CDCl<sub>3</sub>) of 3n

YD-1H\_46.f1d  
YD-10

8.6659  
8.6520  
8.0918  
8.0777  
7.6290  
7.6167  
7.6037  
7.5672  
7.5636  
7.4821  
7.4692  
7.4565  
7.2967  
7.2932  
7.2834  
7.2800  
7.0587  
7.0455  
3.5171  
3.5029  
3.4887  
3.0280  
3.0138  
2.9997

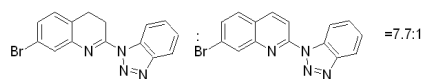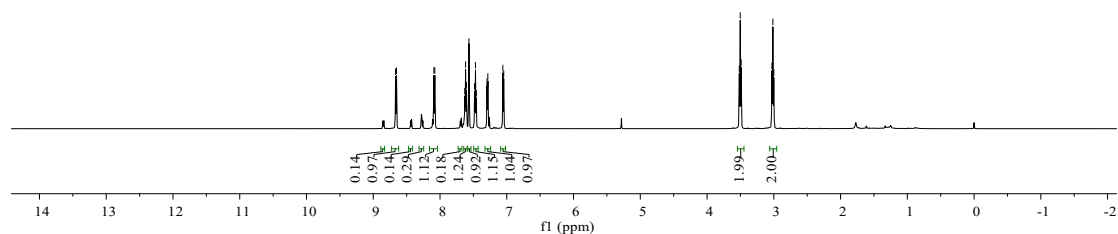

### <sup>13</sup>C-NMR Spectrum (151 MHz, CDCl<sub>3</sub>) of 3n

YD-13C\_17.f1d  
YD-10

157.4341  
146.8234  
143.9838  
131.1905  
129.7735  
129.5223  
129.4413  
128.9557  
125.7567  
125.7110  
120.6521  
119.8991  
115.9686  
23.6948  
23.2143

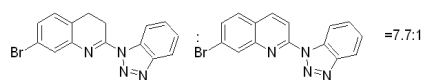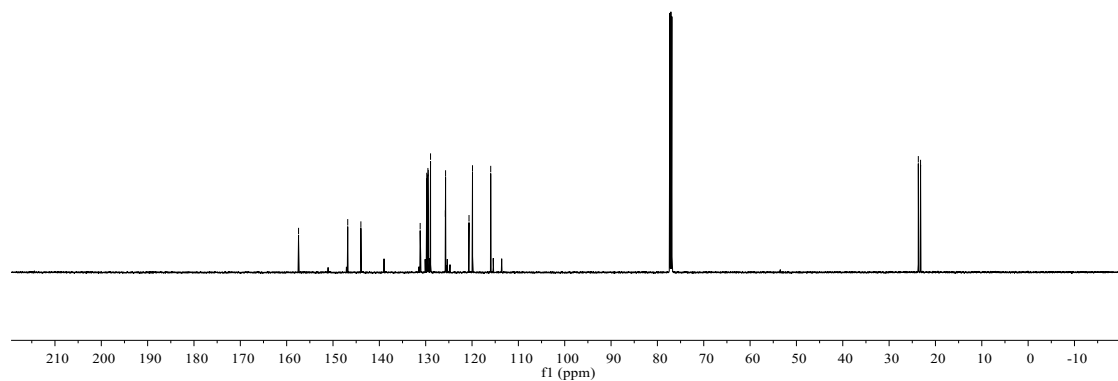

### <sup>1</sup>H-NMR Spectrum (400MHz, CDCl<sub>3</sub>) of 3o

YD-HL\_70.f1d  
YD-31-1

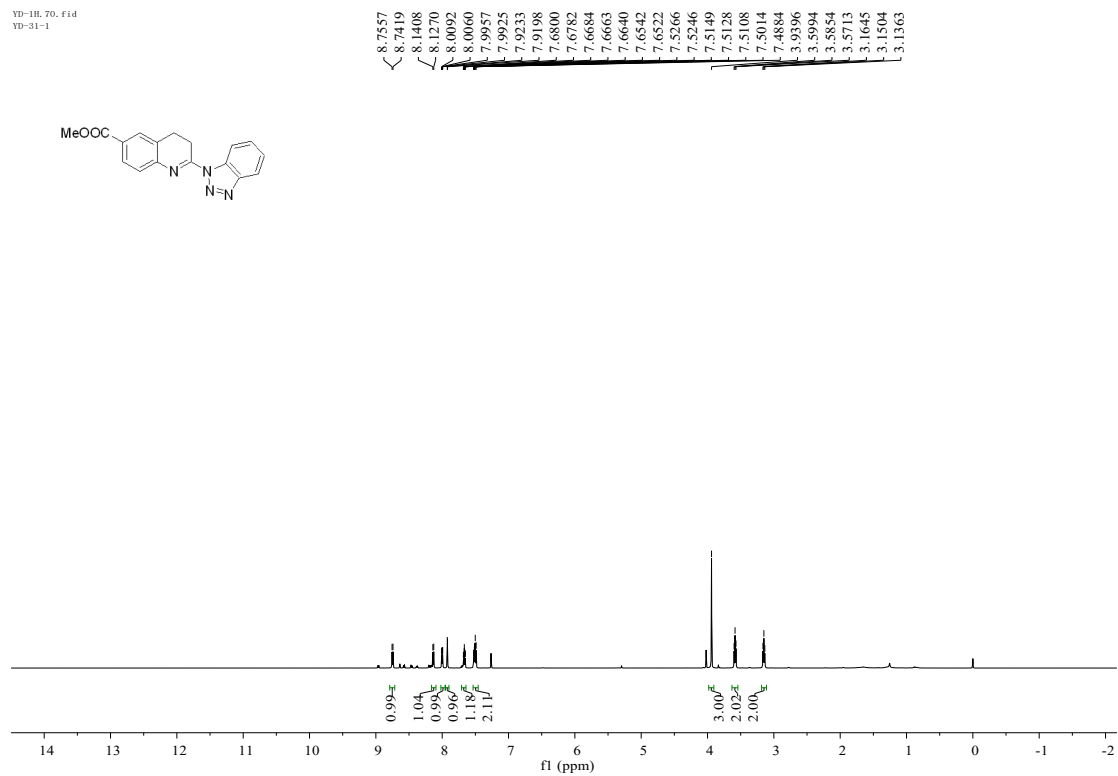

### <sup>13</sup>C-NMR Spectrum (101MHz, CDCl<sub>3</sub>) of 3o

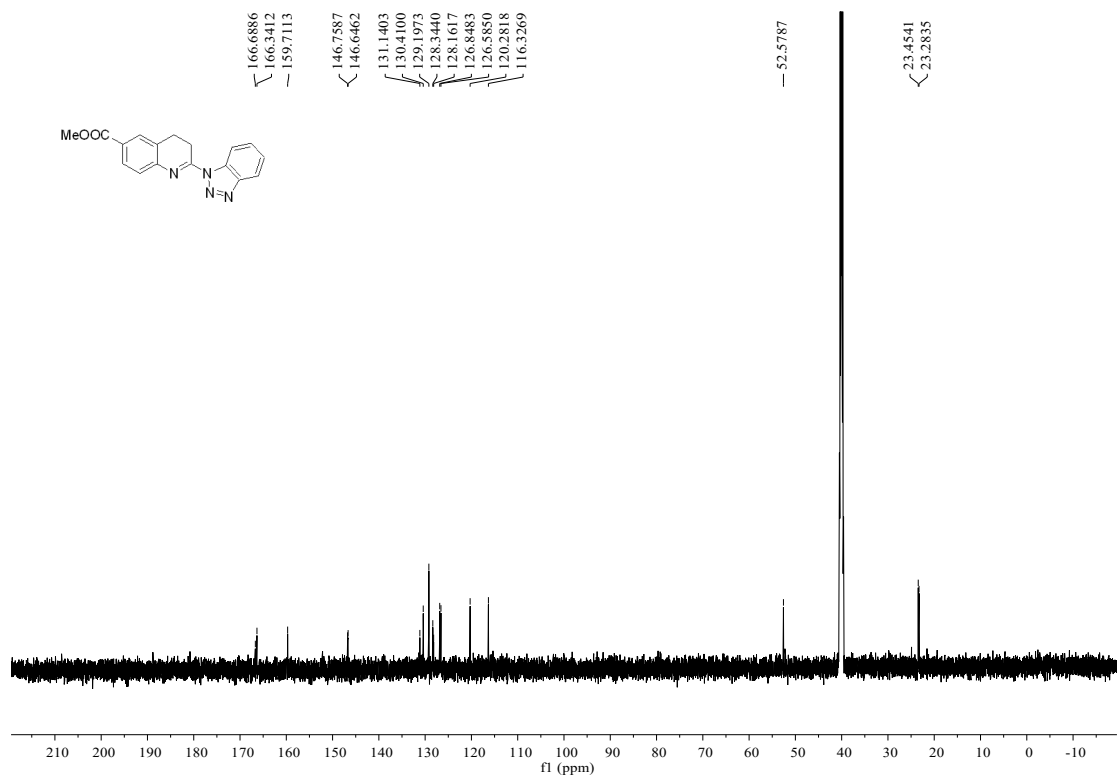

# <sup>1</sup>H-NMR Spectrum (400MHz, CDCl<sub>3</sub>) of 3p

YD-HL-51.f1d  
YD-23

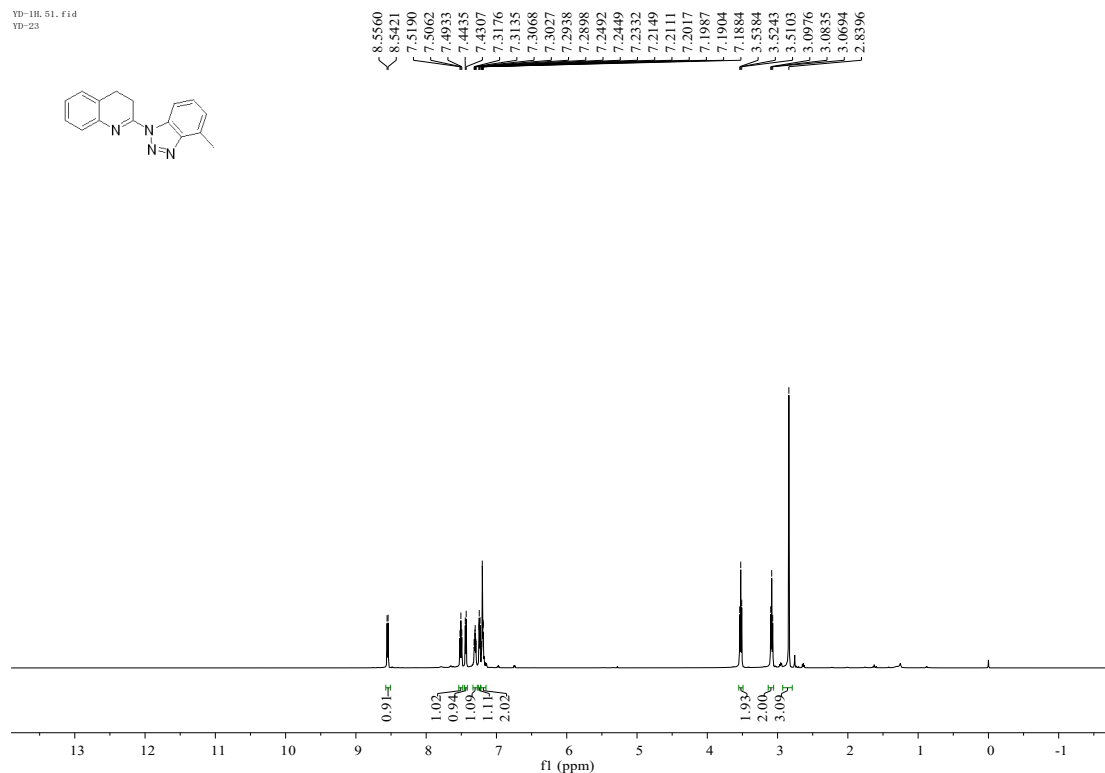

# <sup>13</sup>C-NMR Spectrum (101MHz, CDCl<sub>3</sub>) of 3p

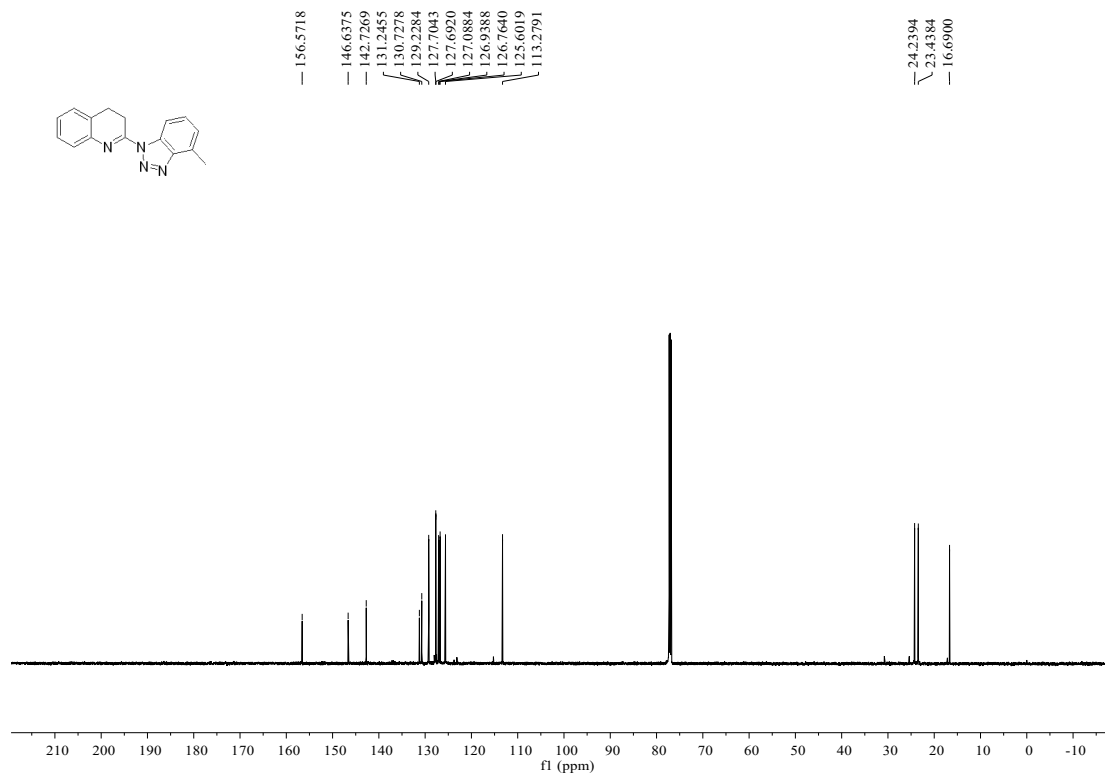

### <sup>1</sup>H-NMR Spectrum (600MHz, CDCl<sub>3</sub>) of 3q

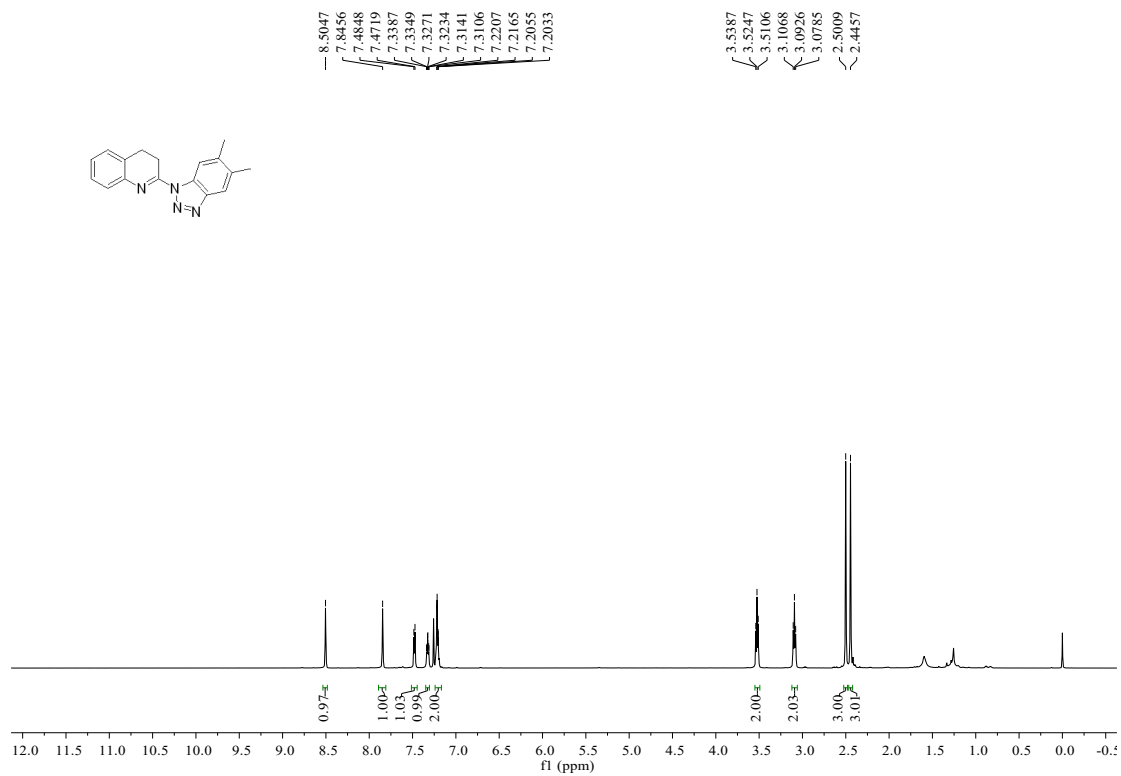

### <sup>13</sup>C-NMR Spectrum (151MHz, DMSO) of 3q

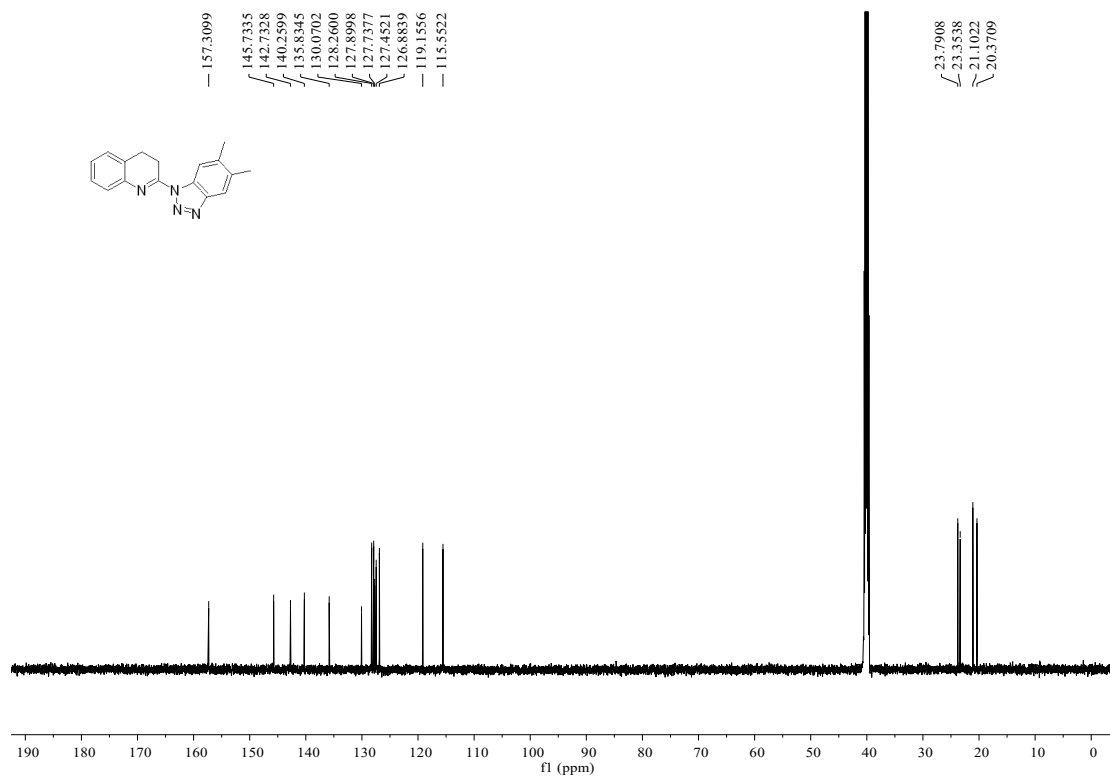

### <sup>1</sup>H-NMR Spectrum (600 MHz, CDCl<sub>3</sub>) of 3r

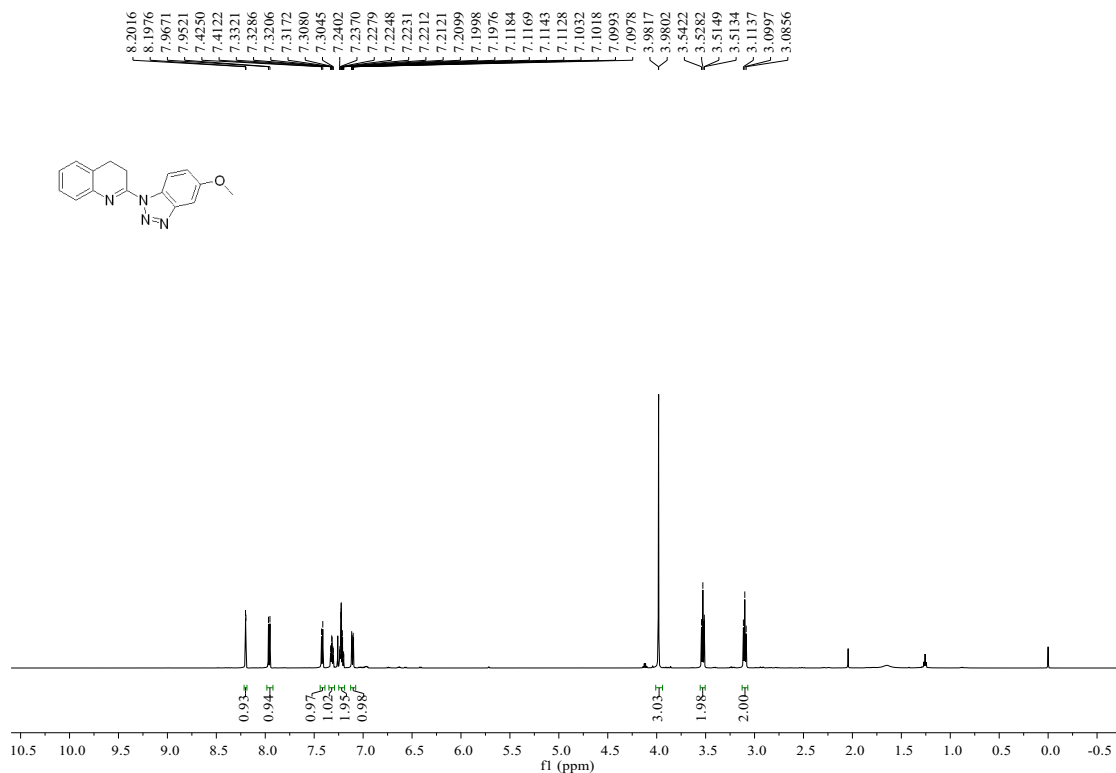

### <sup>13</sup>C-NMR Spectrum (151 MHz, CDCl<sub>3</sub>) of 3r

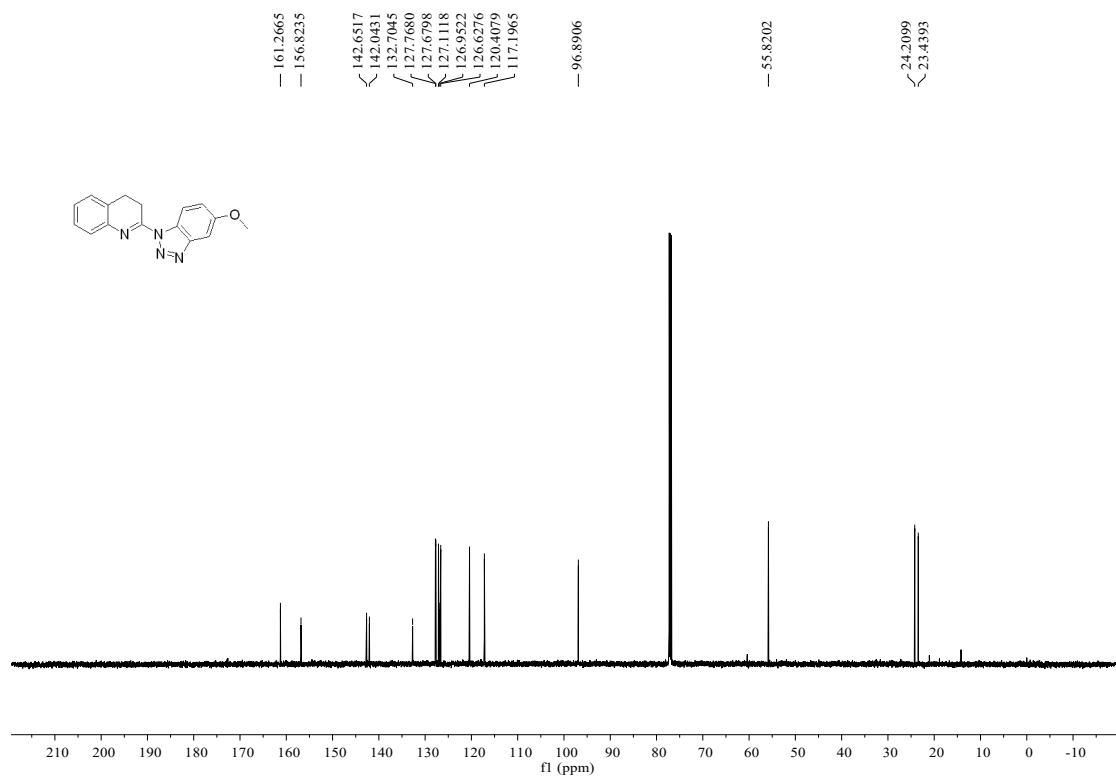

### <sup>1</sup>H-NMR Spectrum (600MHz, CDCl<sub>3</sub>) of 3s

YD-HL\_75.f1d  
YD-30-1

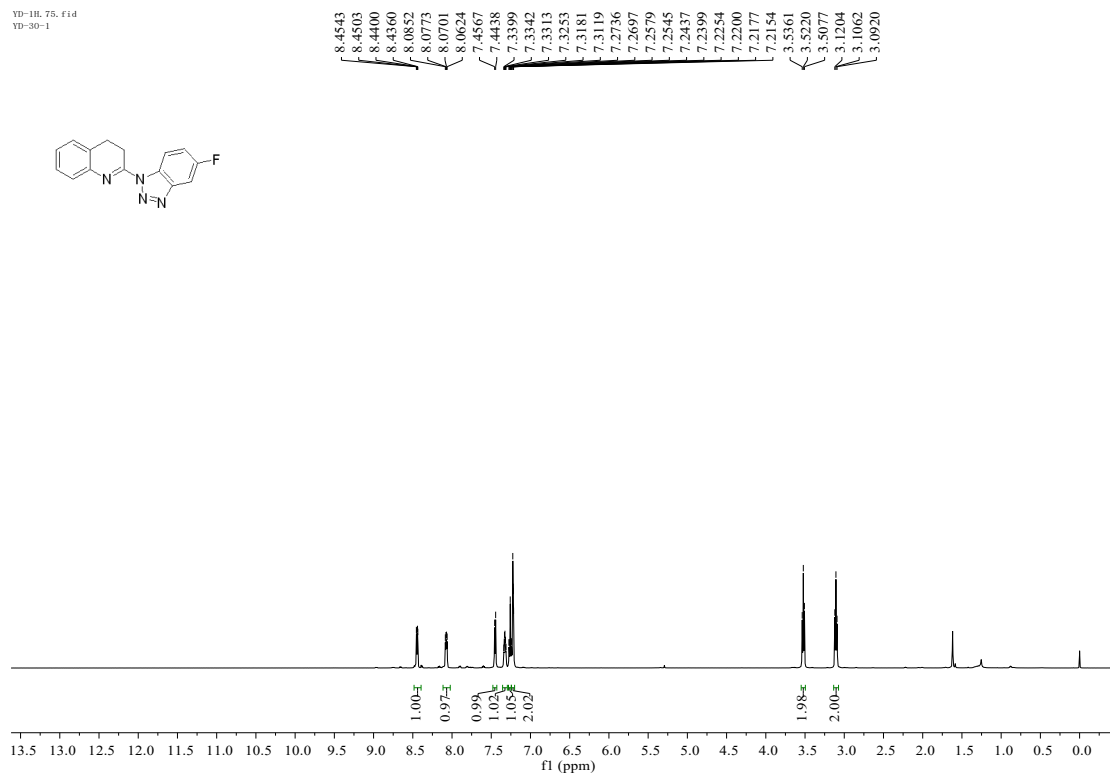

### <sup>13</sup>C-NMR Spectrum (151MHz, CDCl<sub>3</sub>) of 3s

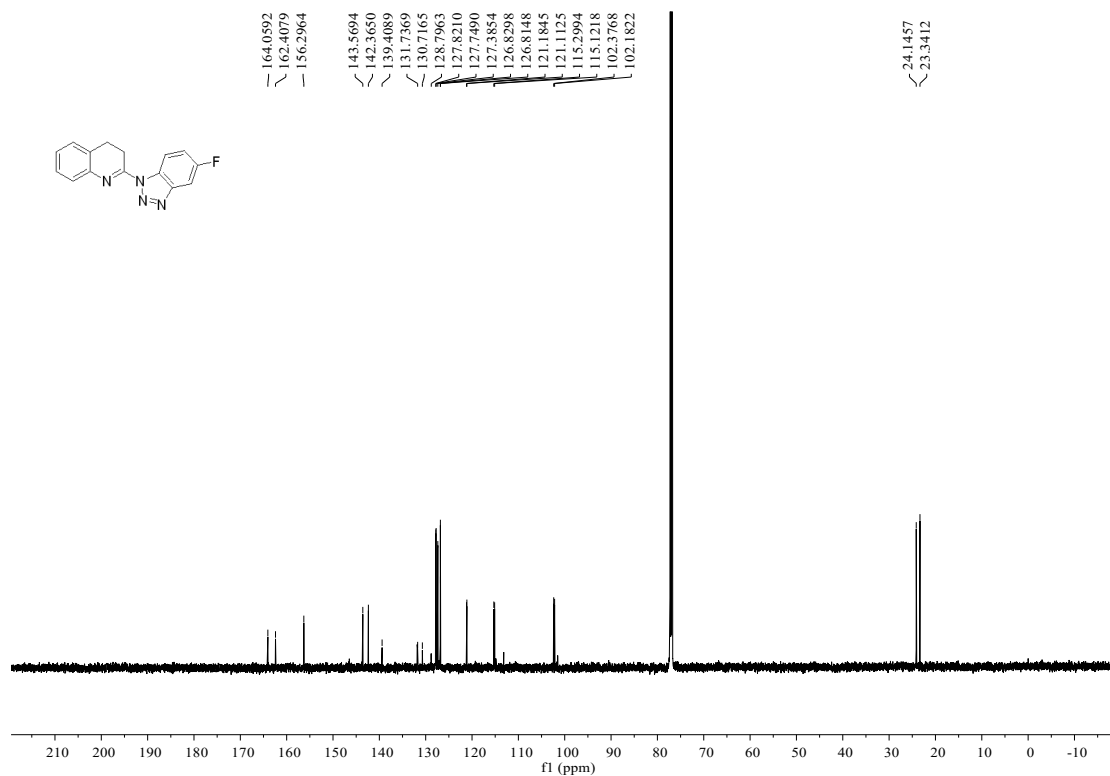

### <sup>1</sup>H-NMR Spectrum (400MHz, CDCl<sub>3</sub>) of 3t

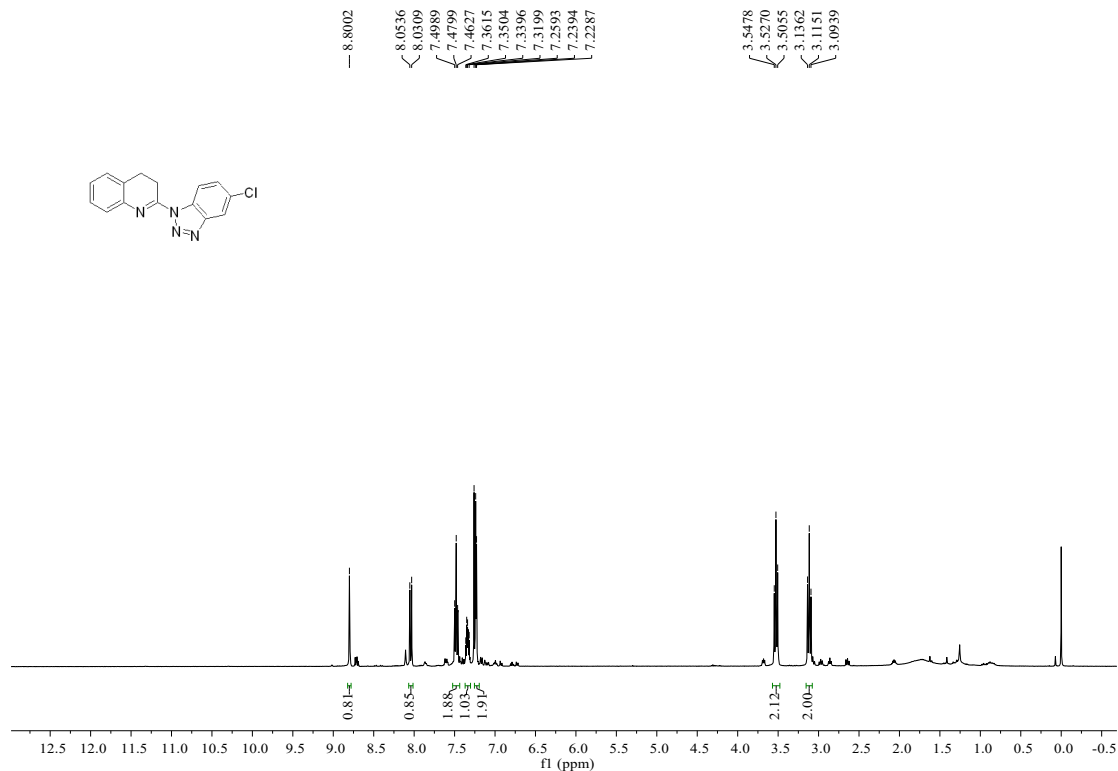

### <sup>13</sup>C-NMR Spectrum (101MHz, CDCl<sub>3</sub>) of 3t

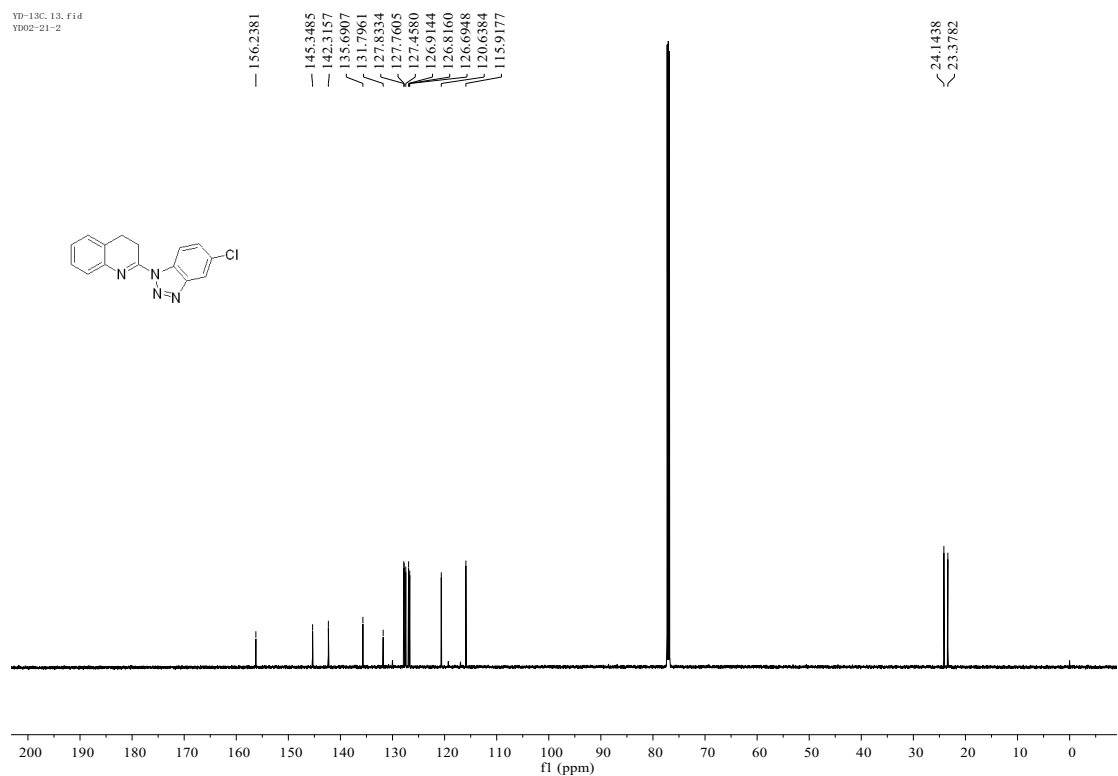



### <sup>1</sup>H-NMR Spectrum (400MHz, CDCl<sub>3</sub>) of 3u

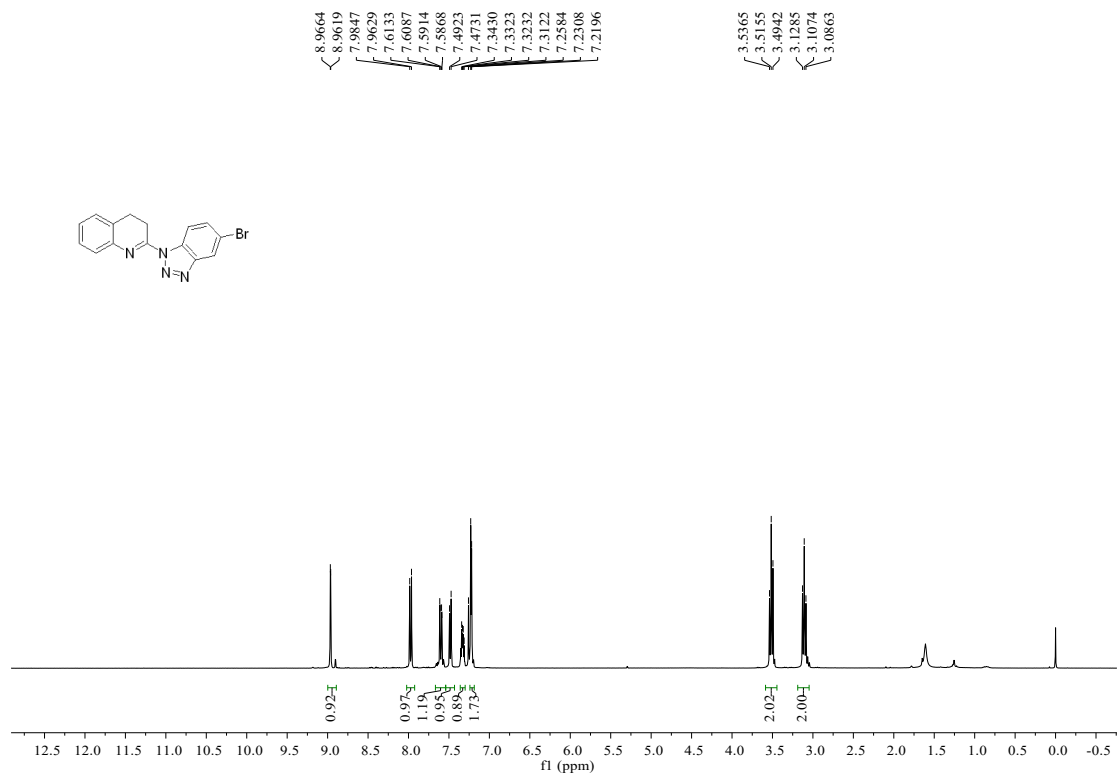

### <sup>13</sup>C-NMR Spectrum (101MHz, CDCl<sub>3</sub>) of 3u

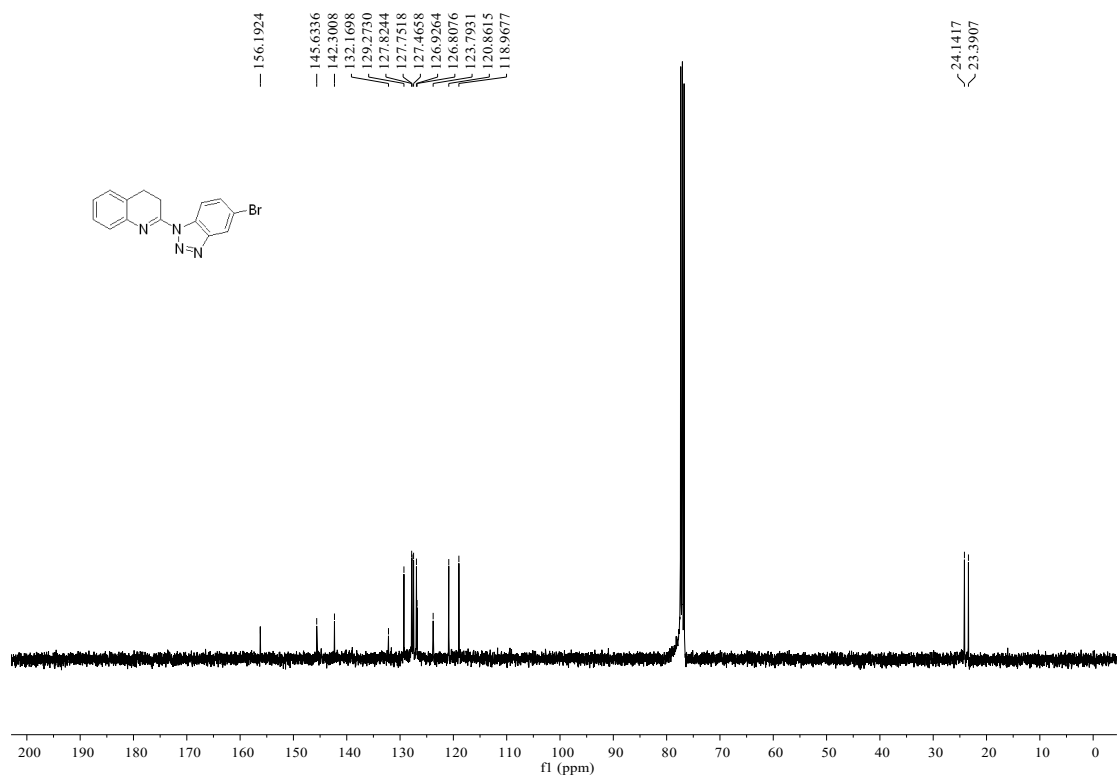

### <sup>1</sup>H-NMR Spectrum (600 MHz, CDCl<sub>3</sub>) of 3v

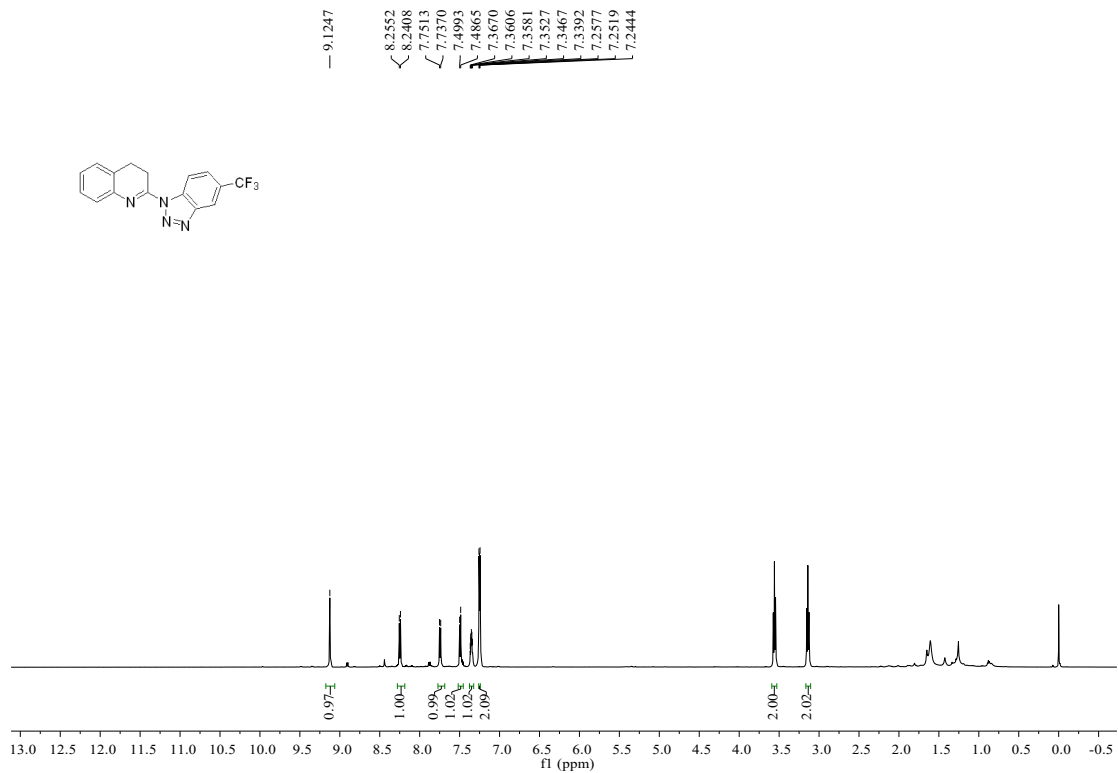

### <sup>13</sup>C-NMR Spectrum (151 MHz, CDCl<sub>3</sub>) of 3v

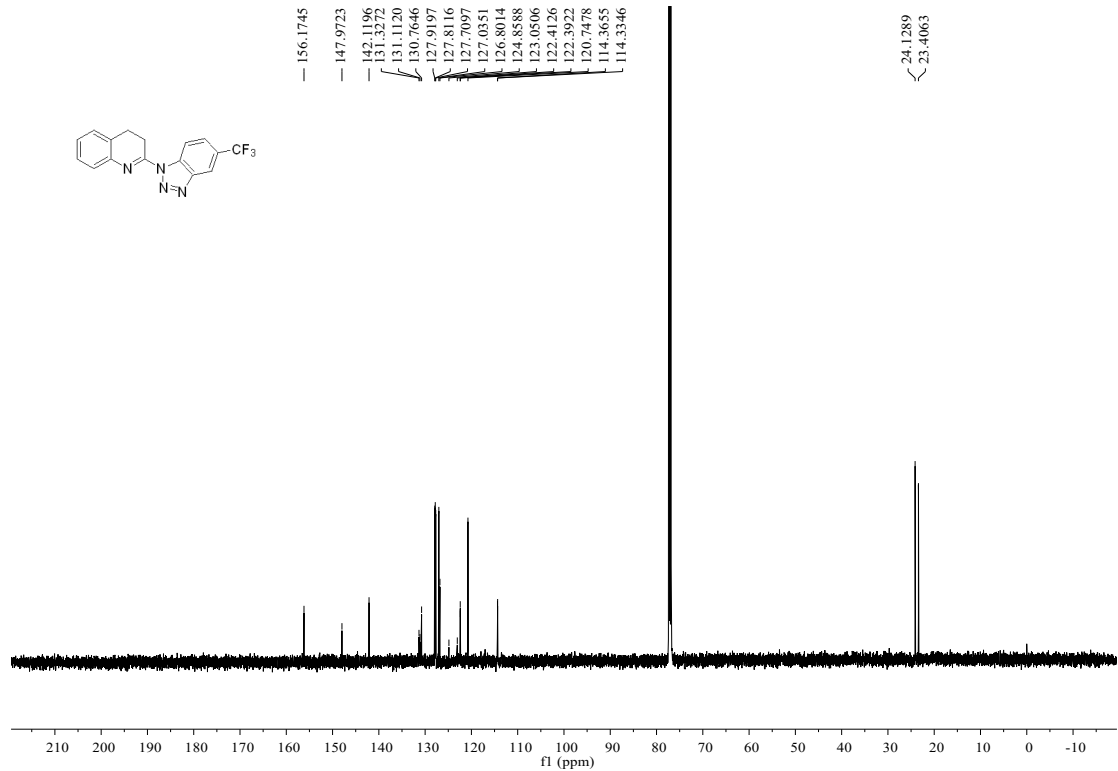

# <sup>1</sup>H-NMR Spectrum (600 MHz, CDCl<sub>3</sub>) of 3w

YD-18\_17.fid  
YD-02-15-3

8.6193  
8.6173  
8.3917  
7.8201  
7.8180  
7.3554  
7.3427  
7.3163  
7.3118  
7.3056  
7.3016  
7.2984  
7.2934  
7.2886  
7.2296  
7.2276  
7.2228  
7.2191  
7.2176  
3.4246  
3.4105  
3.3962  
3.0792  
3.0649  
3.0507

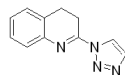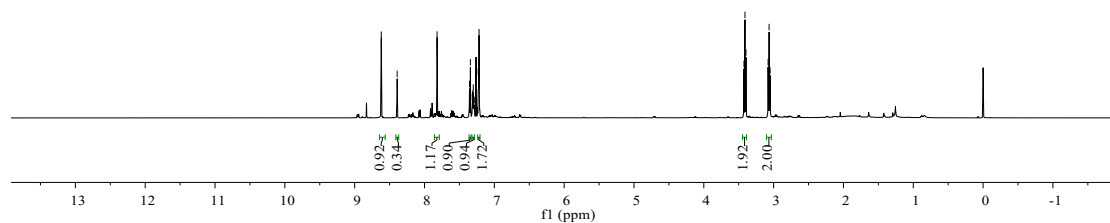

# <sup>13</sup>C-NMR Spectrum (151 MHz, CDCl<sub>3</sub>) of 3w

YD-18C\_10.fid  
YD-02-15-3

154.2835  
141.9306  
139.6978  
137.1152  
134.2494  
127.8438  
126.9360  
120.7299  
112.7977  
24.0103  
22.8009

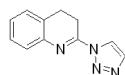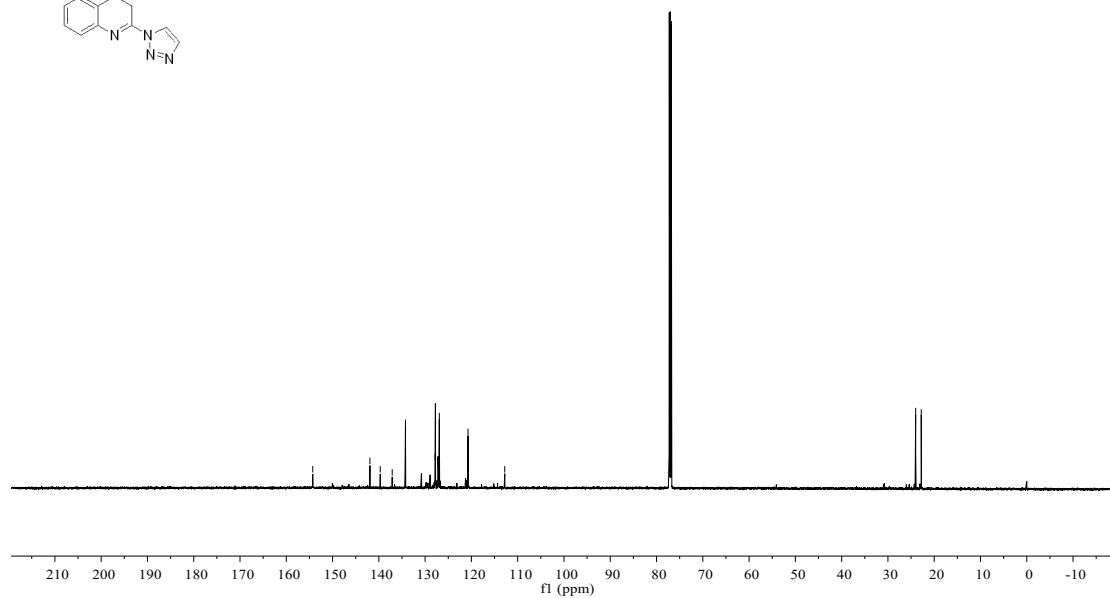

**<sup>1</sup>H-NMR Spectrum (400MHz, CDCl<sub>3</sub>) of 3x**

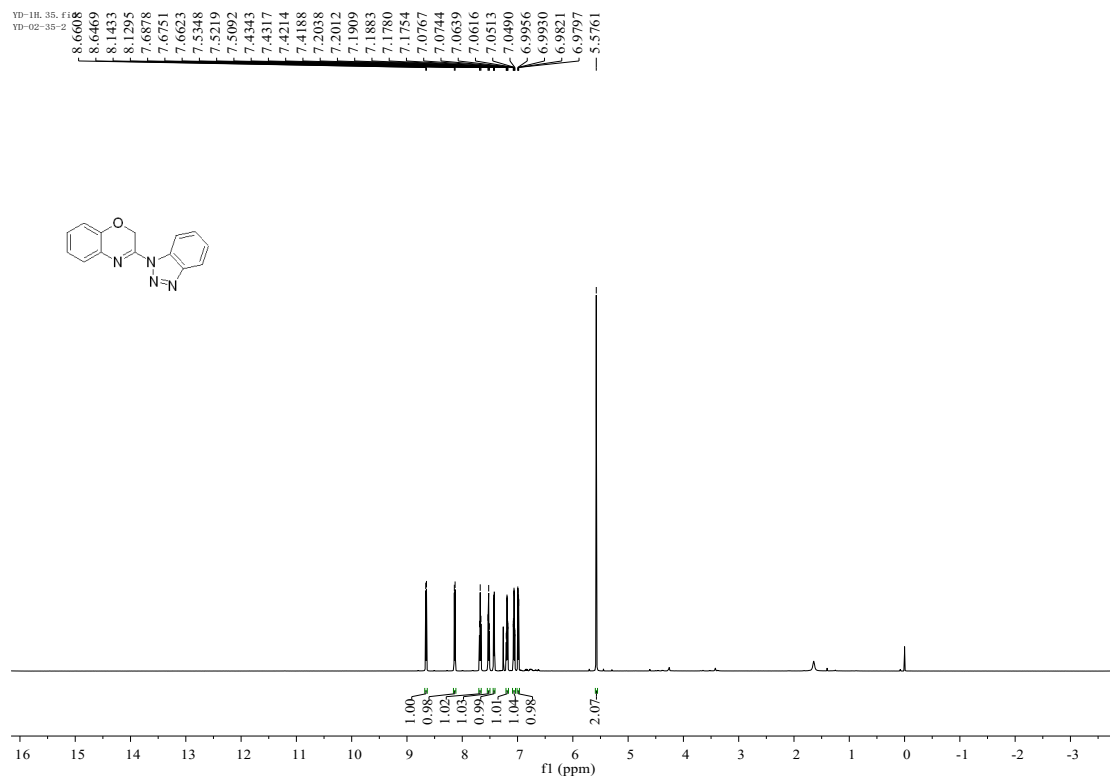

**<sup>13</sup>C-NMR Spectrum (151 MHz, CDCl<sub>3</sub>) of 3x**

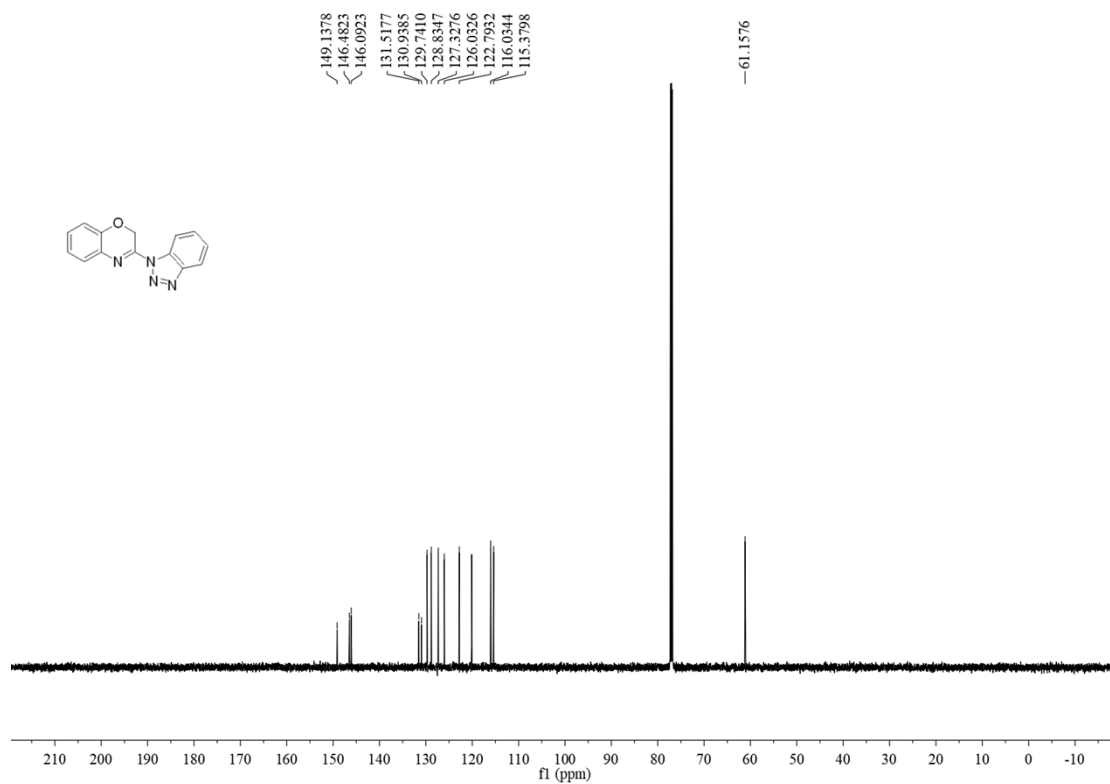

### <sup>1</sup>H-NMR Spectrum (600 MHz, CDCl<sub>3</sub>) of 4a

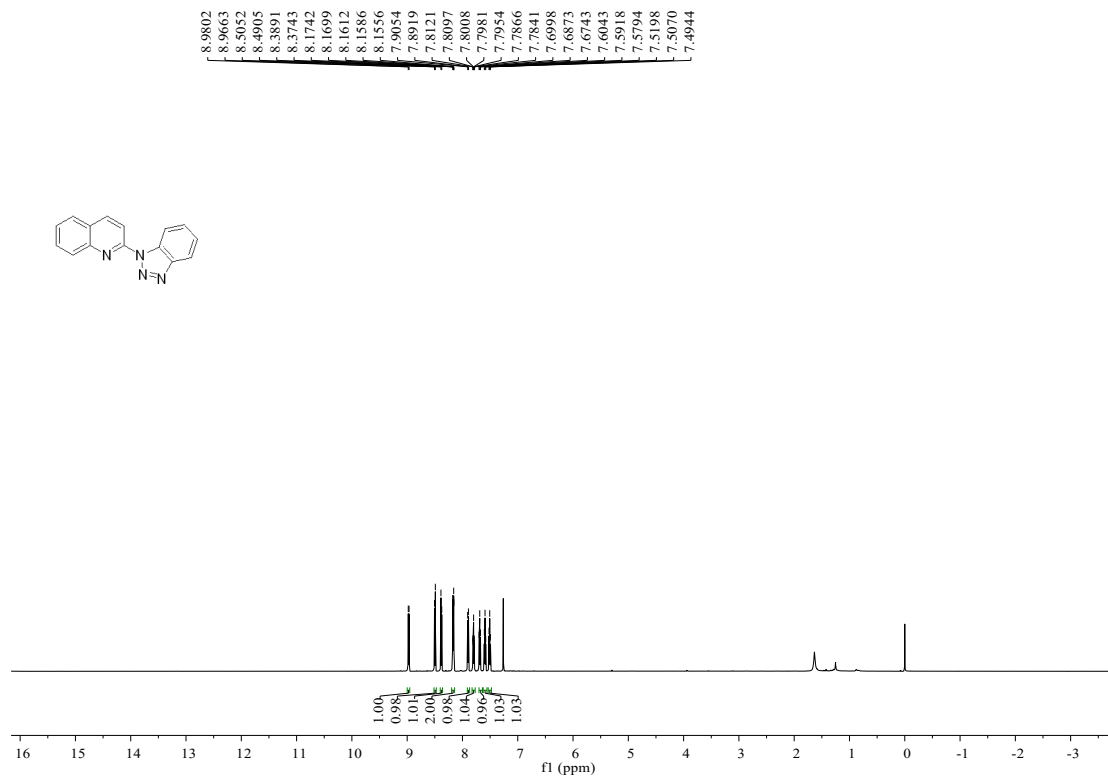

### <sup>13</sup>C-NMR Spectrum (151 MHz, CDCl<sub>3</sub>) of 4a

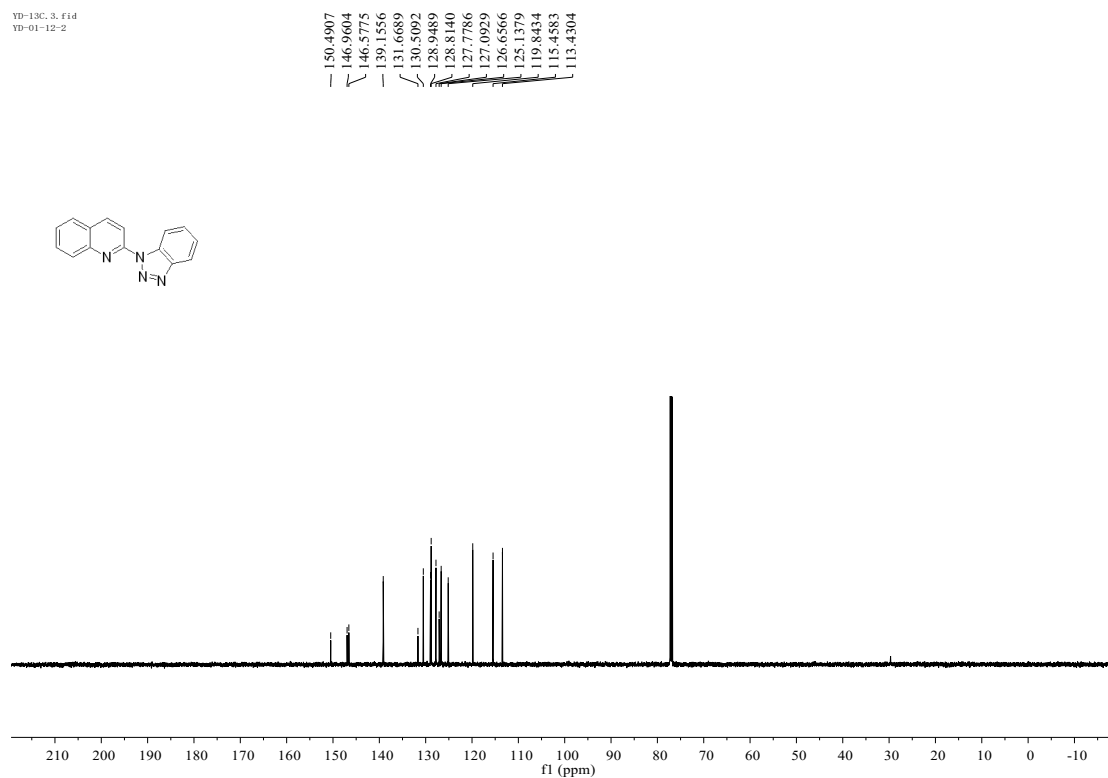

# <sup>1</sup>H-NMR Spectrum (600 MHz, CDCl<sub>3</sub>) of 4b

1D-1H\_44.fid  
1D-02-44-1

8.9663  
8.9524  
8.4608  
8.4568  
8.4460  
8.4424  
8.4392  
8.3010  
8.2865  
8.2808  
8.1648  
8.1509  
8.0694  
8.0554  
7.6903  
7.6772  
7.6639  
7.6375  
7.6230  
7.5128  
7.4989  
7.4873

— 2.5815

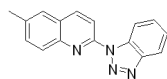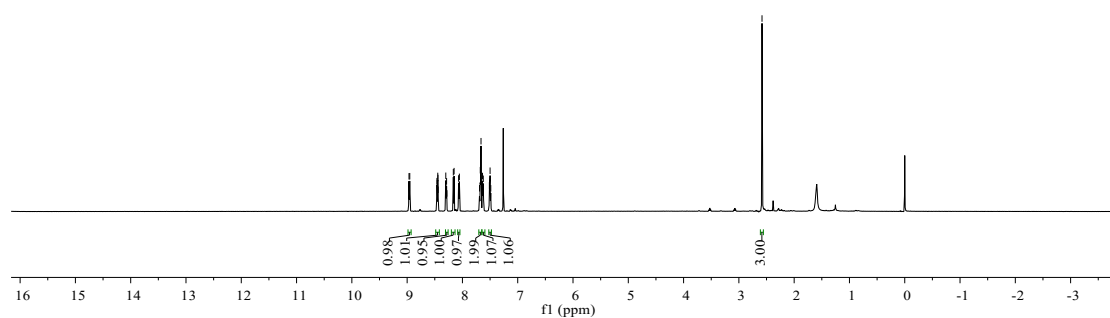

# <sup>13</sup>C-NMR Spectrum (151 MHz, CDCl<sub>3</sub>) of 4b

1D-13C\_23.fid  
1D-02-44-1

149.9132  
146.9120  
145.0094  
138.5612  
136.7375  
132.7827  
131.6516  
128.8986  
128.5042  
127.1516  
126.7763  
125.1106  
119.8250  
115.4357  
113.4353

— 21.6044

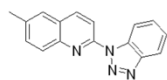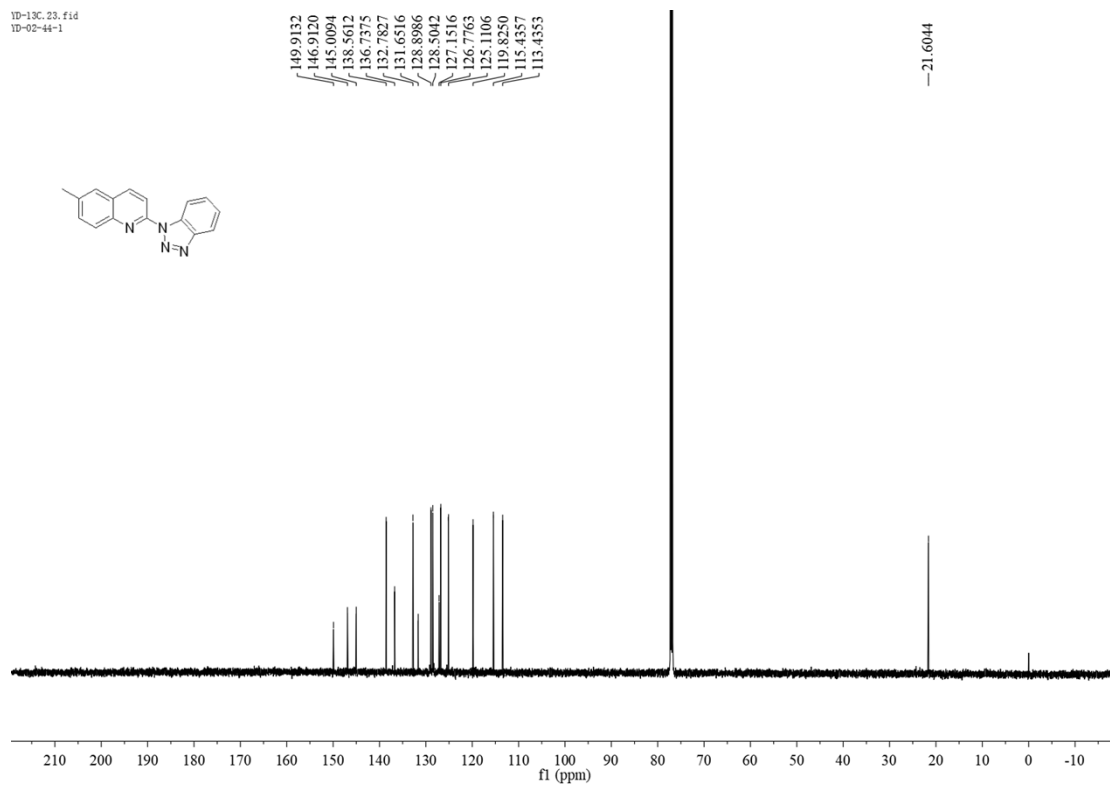

# <sup>1</sup>H-NMR Spectrum (600 MHz, CDCl<sub>3</sub>) of 4c

YD-1B\_45.fid  
YD-02-45-1

8.8927  
8.8788  
8.8086  
8.4938  
8.2702  
8.2554  
8.1568  
8.1430  
8.0737  
8.0589  
7.8495  
7.8457  
7.7171  
7.7133  
7.7023  
7.6985  
7.6804  
7.6700  
7.6680  
7.6660  
7.6550  
7.5114  
7.4993  
7.4968  
7.4860

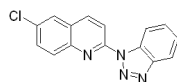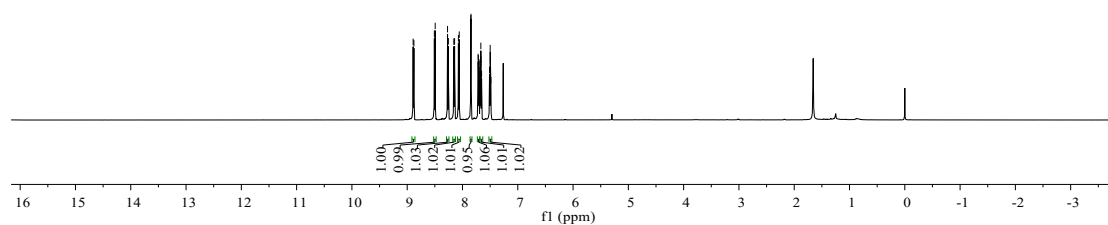

# <sup>13</sup>C-NMR Spectrum (151 MHz, CDCl<sub>3</sub>) of 4c

YD-13C\_21.fid  
YD-02-45-1

150.6138  
146.9304  
144.9054  
138.2588  
132.3879  
131.5062  
131.4466  
130.2955  
129.1449  
127.5998  
126.5491  
125.3309  
119.9520  
118.3523  
114.3495

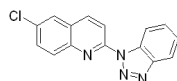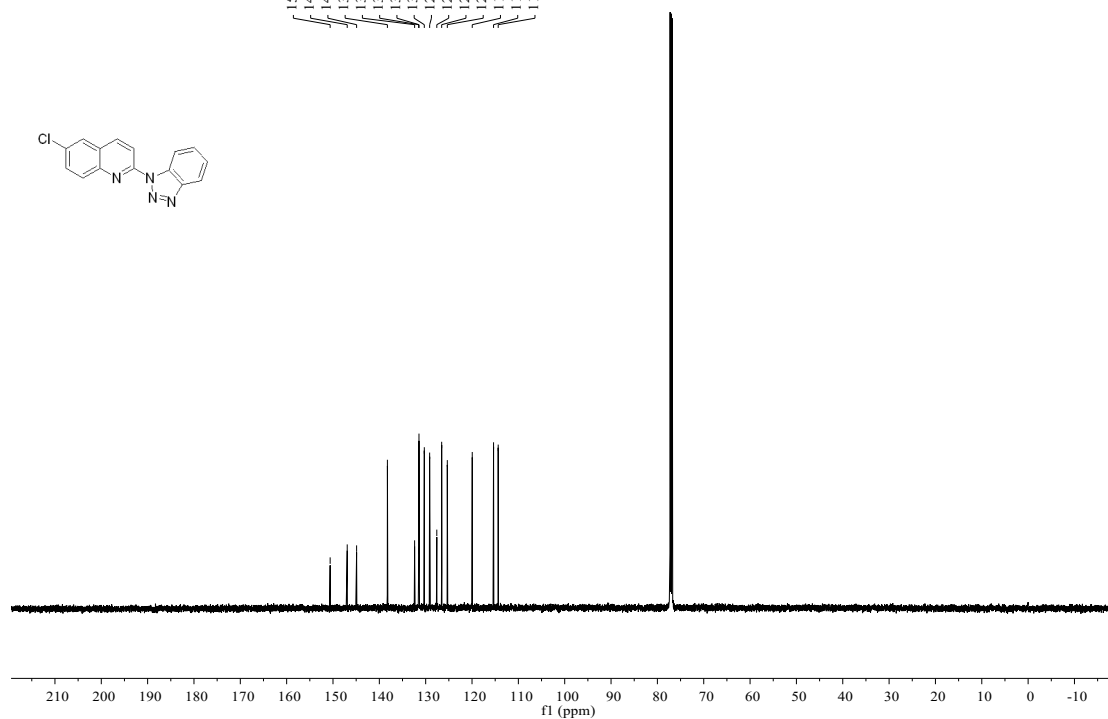

# <sup>1</sup>H-NMR Spectrum (600 MHz, CDCl<sub>3</sub>) of 4d

VD-1H-99.f1d  
VD-2024-315-1

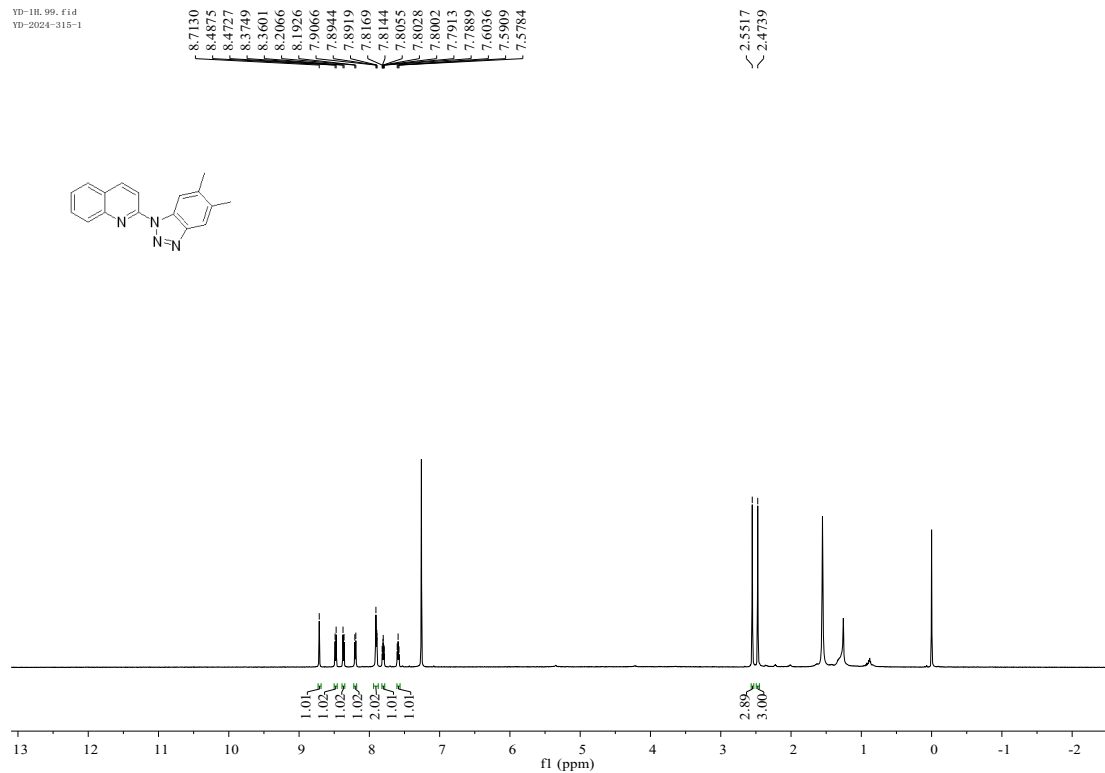

# <sup>13</sup>C-NMR Spectrum (151 MHz, CDCl<sub>3</sub>) of 4d

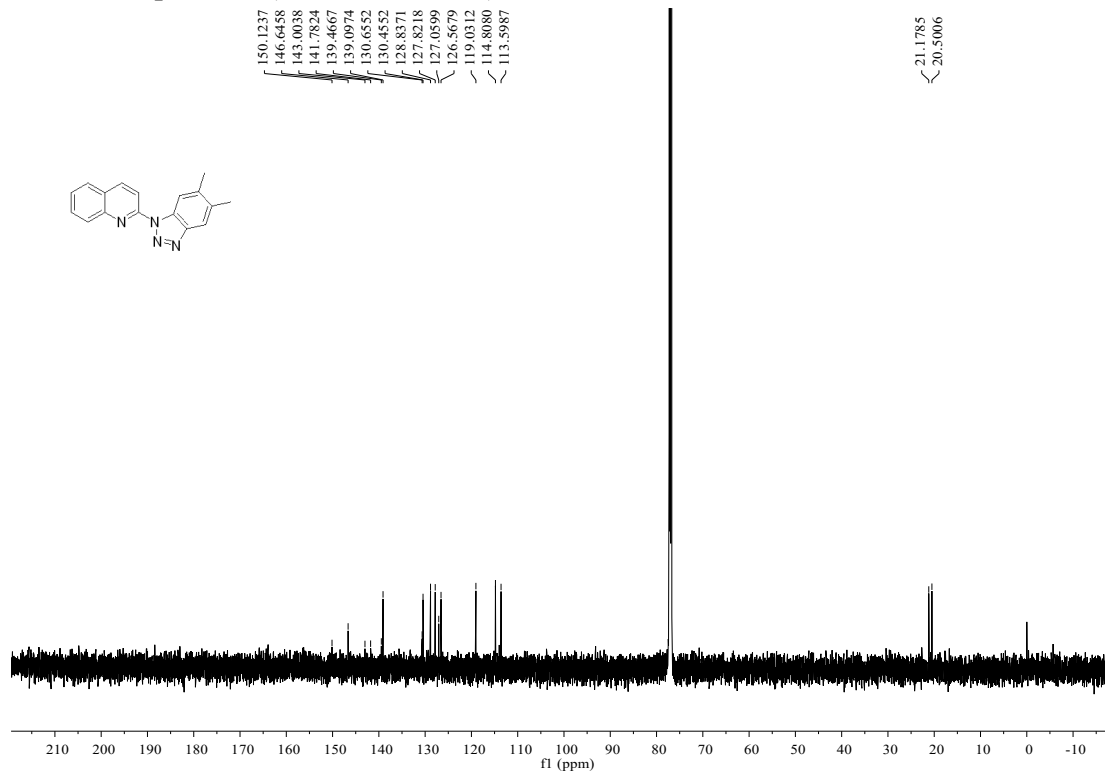



### <sup>1</sup>H-NMR Spectrum (600 MHz, CDCl<sub>3</sub>) of 4e

YD-18\_46\_f1d  
YD-02-45-3

8.7833  
8.7790  
8.2209  
8.2061  
8.1892  
8.1747  
7.9925  
7.9785  
7.7804  
7.7674  
7.6977  
7.6953  
7.6843  
7.6722  
7.6695  
7.4771  
7.4646  
7.4522  
6.5025  
6.4987  
6.4953

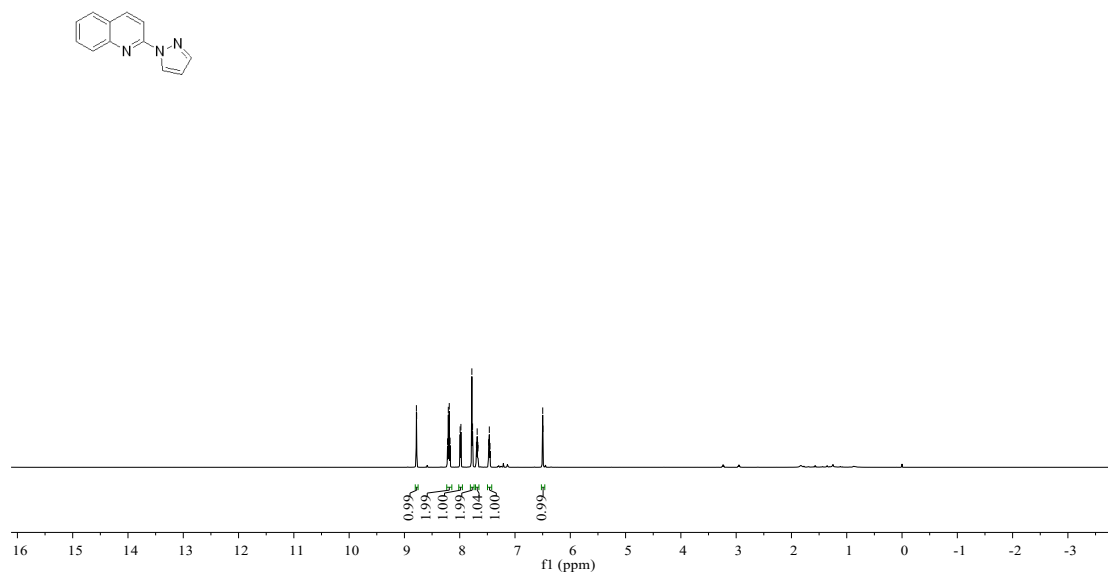

### <sup>13</sup>C-NMR Spectrum (151 MHz, CDCl<sub>3</sub>) of 4e

150.2677  
146.6215  
142.3573  
139.0331  
130.2985  
128.5506  
127.7456  
127.4030  
127.0914  
125.9514  
112.3647  
108.2685

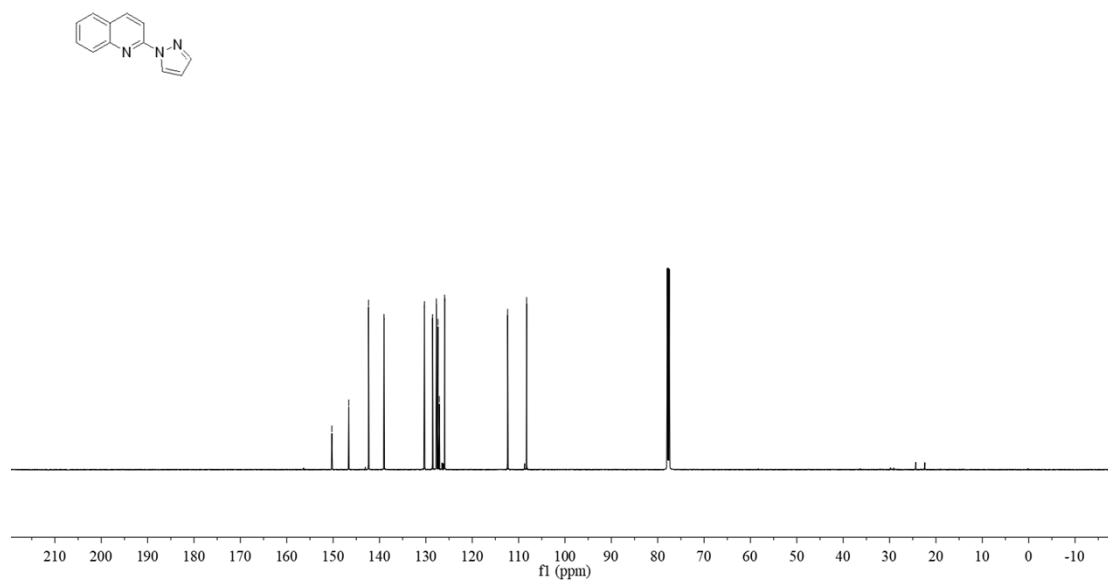

# <sup>1</sup>H-NMR Spectrum (600 MHz, CDCl<sub>3</sub>) of 8

VD-1H-28.f1d  
VD-02-5

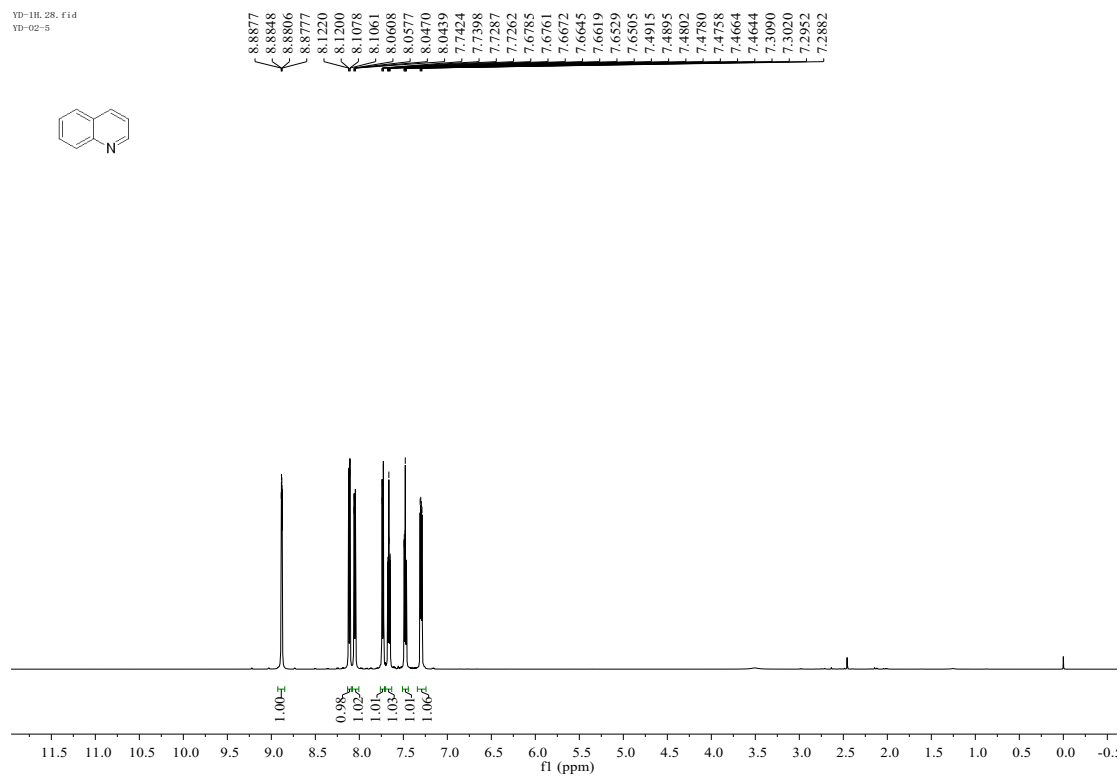

# <sup>13</sup>C-NMR Spectrum (151 MHz, CDCl<sub>3</sub>) of 8

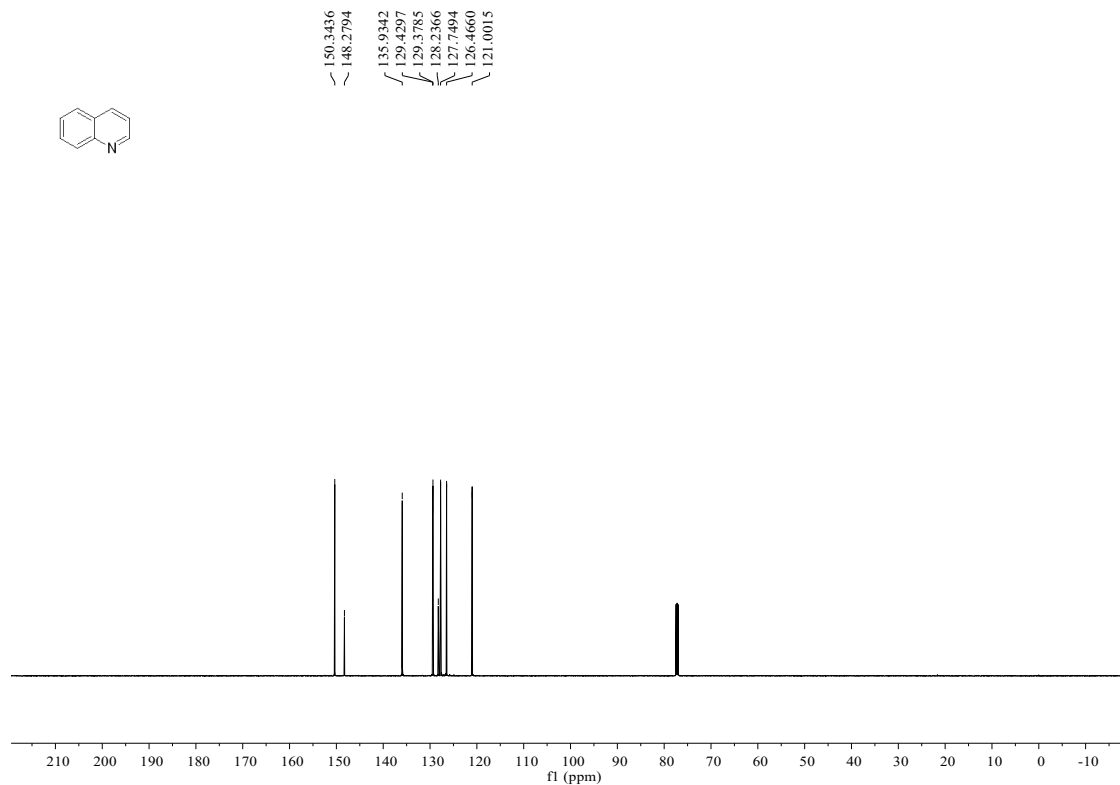

### <sup>1</sup>H-NMR Spectrum (600 MHz, CDCl<sub>3</sub>) of 9

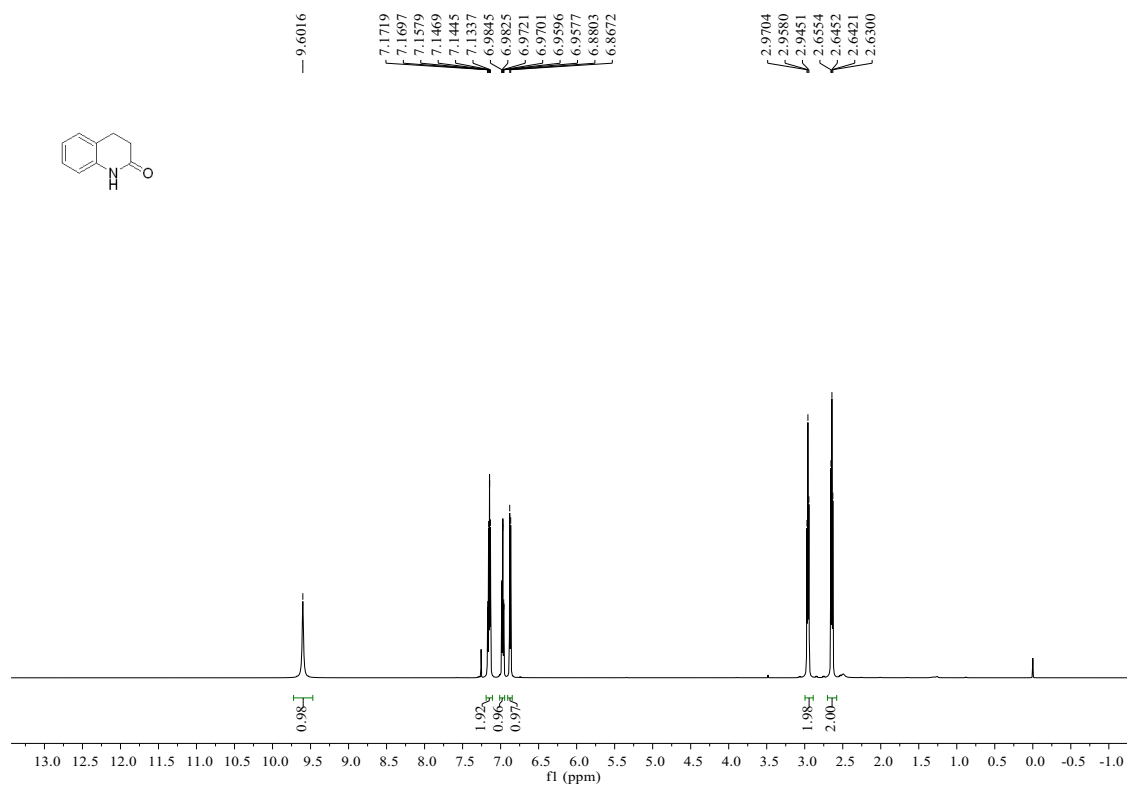

### <sup>13</sup>C-NMR Spectrum (151 MHz, CDCl<sub>3</sub>) of 9

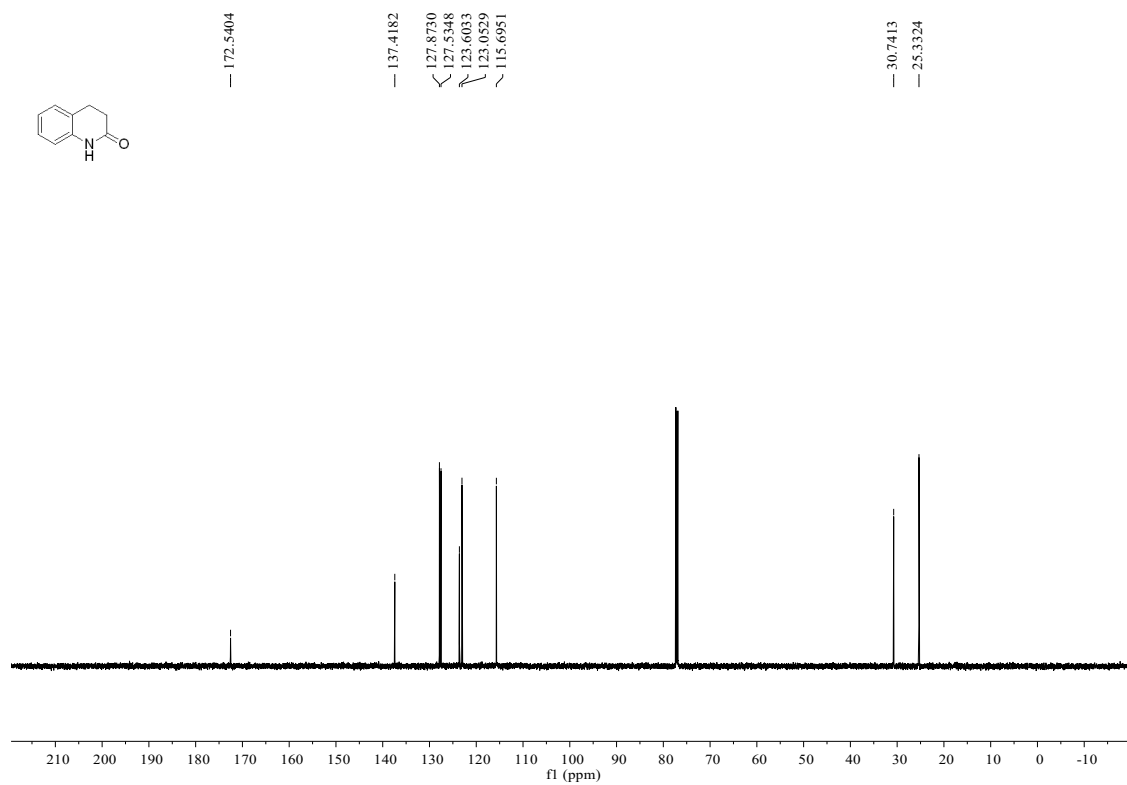

**<sup>19</sup>F-NMR Spectrum (565 MHz, CDCl<sub>3</sub>) of 3i**

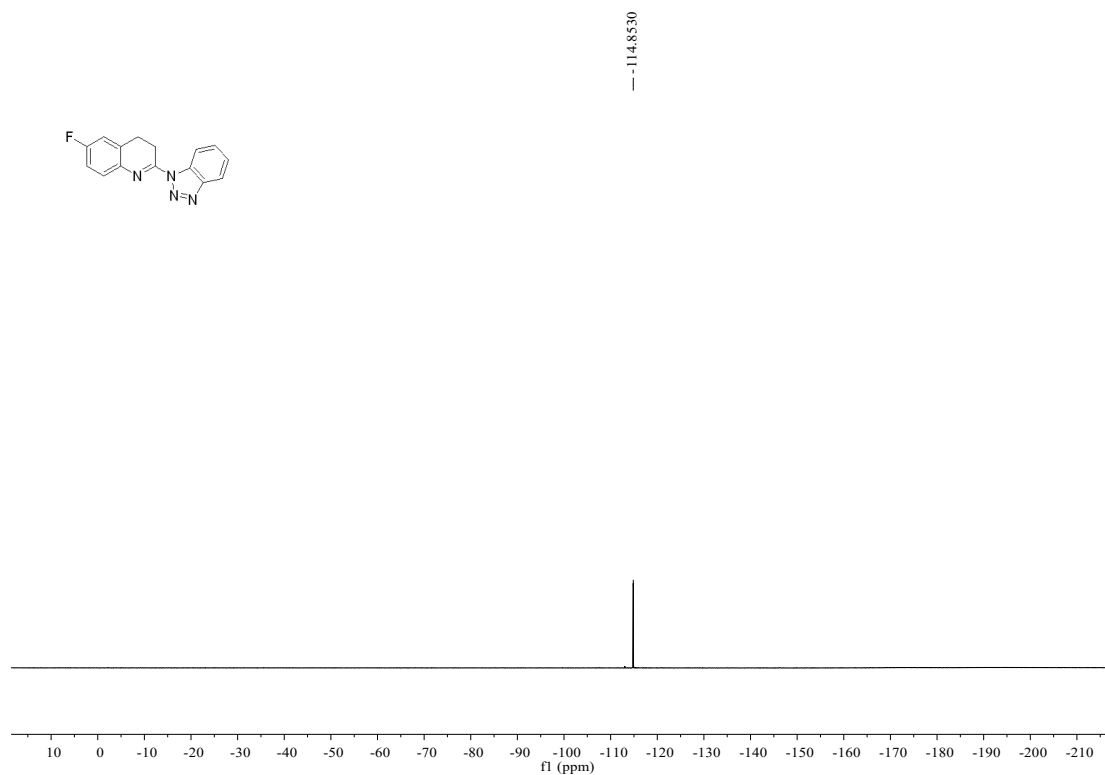

**<sup>19</sup>F-NMR Spectrum (565 MHz, CDCl<sub>3</sub>) of 3s**

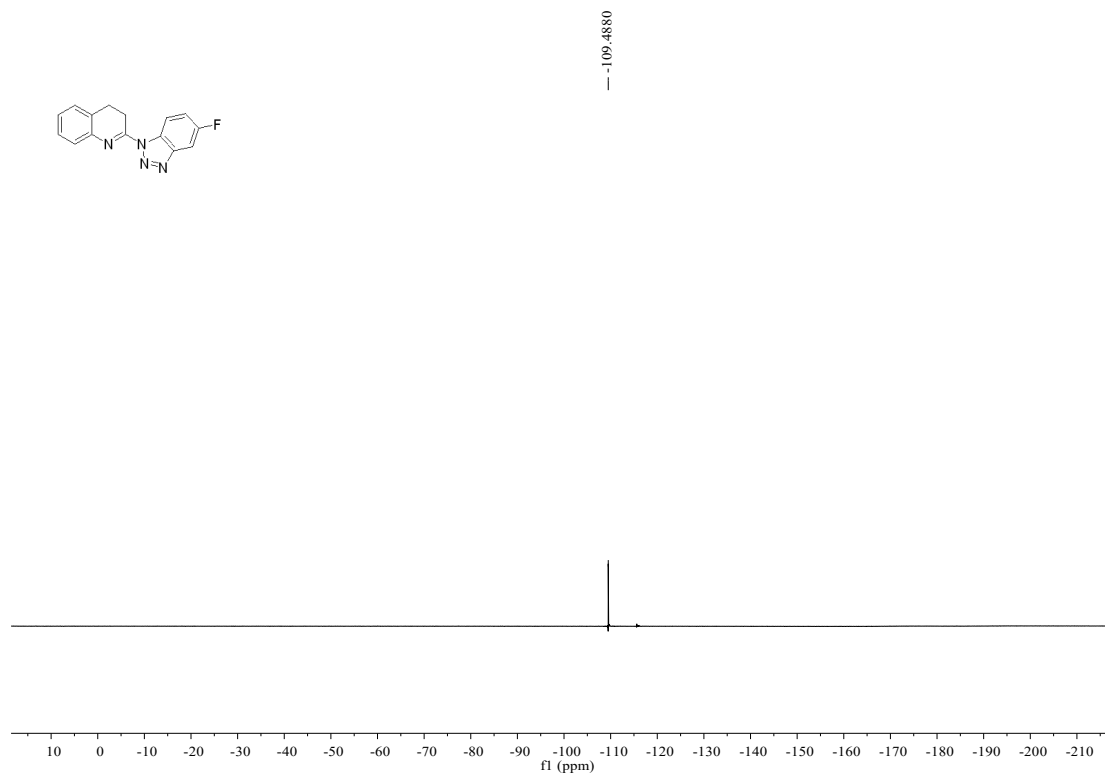

**<sup>19</sup>F-NMR Spectrum (565 MHz, CDCl<sub>3</sub>) of 3w**

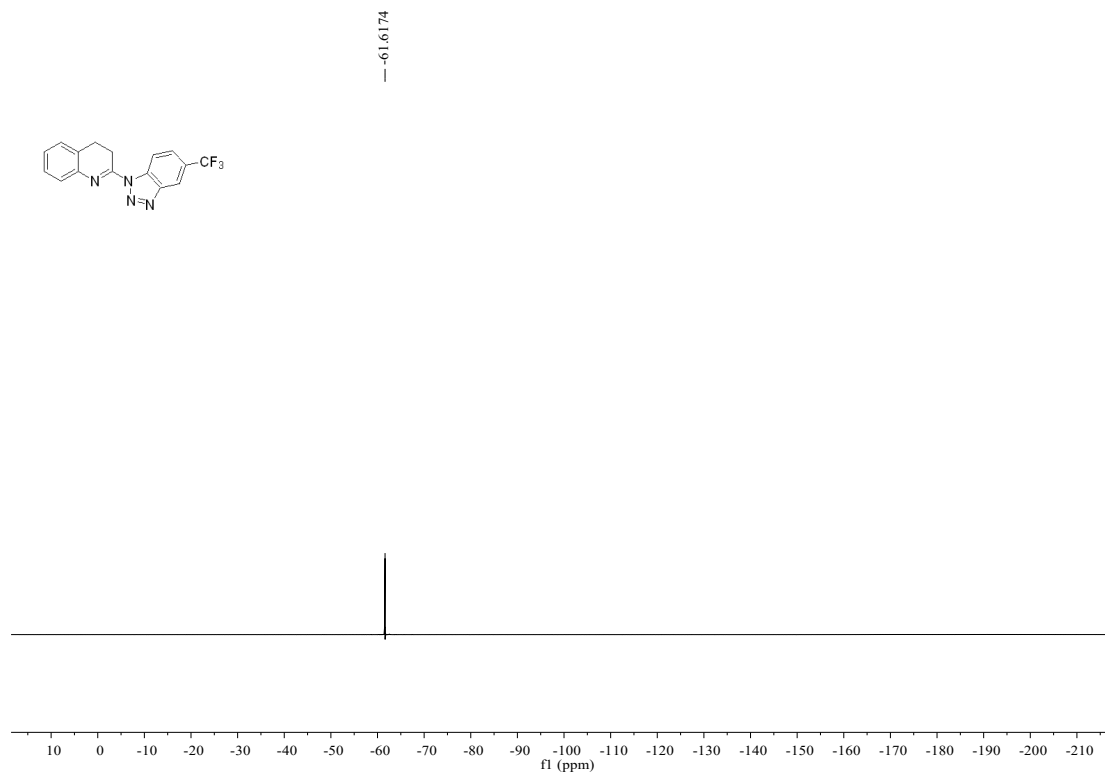

Supplement: d3gc04453j1.pdf [file d3gc04453j1.pdf]
